# Supplementary material for: Improving course evaluation processes in higher education institutions: a modular system approach
Source: PeerJ Comput Sci. 2025 Aug 28;11:e3110. doi: 10.7717/peerj-cs.3110 (PMC12453702; doi:10.7717/peerj-cs.3110)
Supplement: Supplemental Information 3 [file peerj-cs-11-3110-s003.xls]

## Sheet: ANKET
SORU_1	SORU_2	SORU_3	SORU_4	SORU_5	SORU_6	SORU_7	SORU_8	SORU_9	SORU_10	SORU_11	SORU_12	SORU_13	SORU_14	SORU_15	SORU_16	AÇIKLAMA	Comments
3	3	3	2	2	3	4	3	4	4	4	4	4	4	4	4	öğretim görevlisi hocamız dersin içeriğine kullanılan materyallere özen göstererek dersimizi işlemiştir	Our lecturer taught our course by paying attention to the content of the course and the materials used.
2	2	2	2	1	2	2	2	1	1	1	1	1	1	1	1	HOCAMIZ BİZİ GEREKSİZ ZORLUYO DERSTE ANLATILANLA SINAVDA SORULAN SORULARIN BENZERLİĞİ ÇOK AZ	OUR TEACHER IS UNNECESSARILY CHALLENGING US. THERE IS VERY LITTLE SIMILARITY TO THE QUESTIONS ASKED IN THE EXAM AND WHAT IS EXPLAINED IN THE COURSE.
3	4	4	3	4	3	2	3	2	3	3	3	3	3	3	3	Güzeldi	it was nice
4	4	4	4	3	4	3	4	4	1	1	1	1	1	1	1	Çan yapılan bir derste farklı şubelere yapılan quizlerin daha adil-eşit zorlukta olması gerektiğini düşünüyorum.	I think that the quizzes given to different branches in a course where bells are made should be more fair and of equal difficulty.
4	3	3	3	3	2	3	3	3	2	2	2	2	2	2	2	Dönem boyunca speaking çok az yaptık bu yüzden kendimi konuşma adına çok geliştiremedim. Derste genellikle türkçe konuştuğumuz için bana çok bir katkısı olmadı. Ayrıca zaman zaman ses sisteminde aksaklıklar olduğu için ve internet sıkıntısı çektiğimiz için bazı reading aktivitelerini geçmek zorunda kaldık.	We did very little speaking during the semester, so I couldn't improve myself much in terms of speaking. Since we mostly spoke Turkish in class, it did not help me much. In addition, we had to skip some reading activities because there were problems in the sound system from time to time and we had internet problems.
4	4	4	4	4	4	3	4	4	4	4	4	4	4	4	4	Ders içeriğine uygun olarak işlendi.	It was taught in accordance with the course content.
4	4	4	4	4	4	4	4	4	4	4	4	4	4	4	4	Bu ders gayet güzeldi.	This lesson was very good.
3	4	4	4	4	4	4	4	4	4	4	4	4	4	4	4	iyi ki varsınız hocam, teşekkürler	I'm glad to have you sir, thank you
4	4	4	4	4	4	4	4	4	4	4	4	4	4	4	4	G2 1. Soru	G2 Question 1
3	3	3	3	3	3	3	3	3	3	3	3	3	3	3	3	Ders çok yoğun ve zor olmasına rağmen; kalma riskim olduğu halde hocadan çok memnun kaldım.	Although the course was very intense and difficult; Even though I had a risk of failing, I was very pleased with the teacher.
2	2	2	2	2	2	2	2	2	2	2	2	2	2	2	2	Ders genel olarak iyiydi	The course was good overall
4	4	4	4	2	2	4	4	4	4	4	4	4	4	4	4	Ders gerçekten çok zor, kredisine göre gereksiz zor olan bir ders. 5 kat daha fazla kredili olup çok daha kolay derslerimiz var. Zor olmasının sebebi herşeyin tarihe dair ezber olması.	The course is really difficult, unnecessarily difficult considering its credits. We have much easier courses with 5 times more credits. The reason it's hard is because everything is about history.
4	4	4	4	4	4	4	4	4	4	4	4	4	4	4	4	Her anlamda yeterli ve güzel bir ders dönemi geçirdiğimi düşünüyorum.	I think I had a good and sufficient academic term in every sense.
3	3	3	3	3	3	3	3	3	3	3	3	3	3	3	3	Bu dersi daha verimli geçirebiliriz daha fazla uygulamayla daha çok şey öğrenerek	We can spend this course more efficiently by learning more with more applications.
4	4	4	4	4	4	4	4	4	4	4	4	4	4	4	4	1200 liralık ücretli uygulamayı zorla aldırıp, o uygulamadan 20 puanlık değerlendirme yapacağız demek üniversiteye yakışmadı. Eğer uygulamanın alınması şartsa bunu okul fiyatına ekleyip insanları mağdur etmeyebilirdiniz.	It did not suit the university to force the 1200 lira paid application to be removed and say that we will evaluate that application with 20 points. If it was necessary to purchase the application, you could add it to the school fee and not make people suffer.
3	3	3	3	3	3	3	3	3	3	3	3	3	3	3	3	Teşekkür ederim.	Thank you.
4	4	4	4	4	4	4	4	4	4	4	4	4	4	4	4	Hocam?a teşekkür ederim.	Thank you teacher.
3	2	2	3	3	3	2	3	3	2	2	2	2	2	2	2	Eğitim süresinde baştan sona öğrendiklerimizi uygulayabileceğimiz bir ödev verilmesi öğrenilen konuların somutlaştırılması adına faydalı olacaktır. Örn. xxx malzemesi için pazarlama karması elemanlarını ve pazarlama sürecini planlayın.	Giving homework in which we can apply what we have learned throughout the training will be beneficial in concretizing the subjects learned. Ex. Plan the marketing mix elements and marketing process for xxx material.
4	4	4	4	4	4	4	4	4	4	4	4	4	4	4	4	Bu ders gayet güzeldi.	This lesson was very good.
2	2	2	2	2	2	2	2	2	2	2	2	2	2	2	2	Bir ömerim yok	I have no praise
1	1	1	1	1	1	1	1	1	1	1	1	1	1	1	1	Bir önerim yok	I don't have a suggestion
4	4	4	4	4	4	4	4	4	4	4	4	4	4	4	4	Dersler dönem boyu gayet keyifliydi.	The classes were very enjoyable throughout the semester.
4	4	4	4	4	4	4	4	4	4	4	4	4	4	4	4	Öğretim elemanın bilgisi ve aktarımı çok güzel.	The instructor's knowledge and communication are very good.
4	4	4	4	4	4	4	3	4	4	4	4	4	4	4	4	teşekkürler	thanks
4	4	4	4	4	4	4	4	4	4	4	4	4	4	4	4	Çok keyifli bir dersti, dönemin başından beri hiç devamsızlık yapmadım. Dersi dinlemek ve kuramcıların hayatlarını dinlemek kendi hayatımla ilgili çok fazla detayı fark etmemi sağladı. Teşekkürler.	It was a very enjoyable course, I have not been absent since the beginning of the semester. Listening to the lecture and listening to the lives of theorists made me realize many details about my own life. Thanks.
3	3	3	3	3	3	3	3	3	3	3	3	3	3	3	3	Hocamız özverili biridir.	Our teacher is a selfless person.
4	4	4	4	4	4	3	4	4	4	4	4	4	4	4	4	Hocam sizinle son dersimizdi her şey için teşekkürler :)	Teacher, this was our last lesson with you, thank you for everything :)
4	4	4	4	4	4	4	4	4	4	4	4	4	4	4	4	Verimli bir dersti	It was a productive lesson
4	4	4	4	4	4	4	4	4	4	4	4	4	4	4	4	Teşekkürler	Thanks
4	4	4	4	4	4	4	4	4	4	4	4	4	4	4	4	Ben sınavlarda çok zorlandım test olmadığı için	I had a hard time in the exams because there was no test.
4	4	4	4	4	4	4	4	4	4	4	4	4	4	4	4	Derslerde kullandığımız materyaller gayet yeterliydi.	The materials we used in the lessons were quite sufficient.
3	3	2	3	4	4	2	4	4	2	2	2	2	2	2	2	Öğretim elemanımız derse oldukça hakim olmasına rağmen slayt okumak harici dersi ilgi çekici hâle getirecek herhangi bir gayret içinde olmayışı, verilen iki ödevle "pratik üzerine kurulu" bir dersi kavramış ve geliştirmiş olduğumuzu düşünüşü final sınavından da anlaşılacağı üzere bütün bir dönemi çöpe attığımızın göstergesidir. Daha fazla ödev, daha fazla yönlendirme ve eleştiri bizleri bu derse …	Although our instructor has a good command of the course, his lack of effort to make the course interesting, other than reading slides, and his belief that we have grasped and developed a "practice-based" course with the two assignments given, is an indication that we have thrown away the entire semester, as can be seen from the final exam. More homework, more guidance and criticism will help us …
4	4	4	4	4	4	4	4	4	4	4	4	4	4	4	4	Verimli bir dersti teşekkürler	It was a productive lesson, thank you.
3	3	3	3	3	3	3	3	3	3	3	3	3	3	3	3	Yok	None
3	3	3	3	3	3	3	3	3	3	3	3	3	3	3	3	Ders konuları biraz ağır olduğunu düşünüyorum ayt sınavında bu konuları yapabilecek kapasitede olan biri ult bölümünü seçmezdi.	I think the course topics are a bit heavy, someone who is capable of doing these subjects in the ayt exam would not choose the ult department.
4	4	4	4	4	4	4	4	4	4	4	4	4	4	4	4	Özellikle mühendisler için oldukça gerekli bir ders olduğunu düşünüyorum. Emeği geçen herkese teşekkürler.	I think it is a very necessary course, especially for engineers. Thanks to everyone who contributed.
4	4	4	4	4	4	4	4	4	4	4	4	4	4	4	4	Dersin işleyişi, bilgi birikimi aktarımı konusunda dersin yanı sıra bize her konuda yardımcı olup okulda olan problemlemlerimize de ayrıyeten yardımcı olup çözüme kavuşturmaya çalıştığı için hocamıza çok teşekkür ederiz.	We would like to thank our teacher for helping us in every aspect of the course, transferring knowledge, and trying to solve our problems at school.
3	4	3	4	4	3	3	3	4	4	4	4	4	4	4	4	Her şey çok iyiydi	Everything was so good
1	1	1	1	1	1	1	1	1	1	1	1	1	1	1	1	Ders sistemde verilen ders içeriği ile benzemiyordu bile. Öğretmenin bilgi konusunda yetersiz olduğunu düşünmüyorum ancak dersi anlatma ve iletişim kurma konusunda yetersizdi. Ders süresince sorduğum hiçbir soruya düzgün bir cevap alamadım bu sebeple konuyu anlamakta zorlandım. Ders içeriğinde verilenler yetersiz geldi.	The course did not even resemble the course content given in the system. I don't think the teacher was inadequate in terms of knowledge, but he was insufficient in explaining the lesson and communicating. I could not get a proper answer to any of the questions I asked during the lecture, so I had difficulty understanding the subject. What was given in the course content was insufficient.
4	4	4	4	4	4	4	4	4	4	4	4	4	4	4	4	Dönem için teşekkür ederiz.	Thank you for the period.
4	4	4	4	4	4	4	4	4	4	4	4	4	4	4	4	<3	<3
4	4	4	4	4	4	4	4	4	4	4	4	4	4	4	4	Ders içerik olarak zor hocamız çok donanımlı bir hoca fakat ders anlatırken kendini çok tekrarlıyor.	The course is difficult in terms of content. Our teacher is a very well-equipped teacher, but he repeats himself a lot while teaching.
1	1	3	3	2	2	1	3	4	3	3	3	3	3	3	3	Öğretmenin konuşurken takılması ve sorulan soruların bazılarının alakasız cevaplaması veya hiç cevaplamaması benim ders işleyişimi olumsuz etkileyen faktörlerdi.	The teacher's slurred speech and her answering some of the questions that were irrelevant or not answering them at all were factors that negatively affected my course.
4	4	3	3	3	3	4	4	4	4	4	4	4	4	4	4	Bilgilendirici bir dersti. Teşekkür ederim.	It was an informative lesson. Thank you.
4	4	4	4	4	4	4	4	4	4	4	4	4	4	4	4	Önerim yok.	I have no suggestions.
2	3	2	3	3	2	2	3	3	3	3	3	3	3	3	3	Ders devamsızlıkları bizim hakkımız olmasa bile elimizde olmadan kullanılabiliyor, saglık sorunlari vb,bu nedenle dersteki devamsizligin notlardirma yüzdesine etkisi olması bana etik gelmiyor.Dersin ayrıca ezber bazlı gitmek yerine gerçek anlamda yorum yapılabilir olmasını dilerdim	Even though class absences are not our right, they can be used without our control, health problems, etc., so it does not seem ethical to me that class absences have an impact on the grading percentage. I also wish the course could be interpreted in real terms instead of being based on memorization.
4	4	4	4	4	4	4	4	4	4	4	4	4	4	4	4	Mükemmel ötesi bir dersti.	It was a beyond perfect lesson.
4	4	4	4	4	4	4	4	4	4	4	4	4	4	4	4	Hocamızın tam bir öğrenci dostu olduğunu ve dersi öğretmenin yanı sıra bizi hayata hazırlama konusunda da çok şey kattığına eminim.Çok teşekkür ederiz.	I am sure that our teacher is a real student friend and that he contributes a lot to preparing us for life as well as teaching the course. Thank you very much.
4	4	4	4	4	4	4	4	4	4	4	4	4	4	4	4	Ders benim için verimli ve keyifliydi. Teşekkürler.	The lesson was productive and enjoyable for me. Thanks.
3	3	3	3	3	3	3	3	3	3	3	3	3	3	3	3	Daha iyi bir sistem olabilir	Could be a better system
4	4	4	4	4	4	4	4	4	4	4	4	4	4	4	4	Hem çok eğlenceli hemde çok öğreticiydi. Derste öğrendiklerimi nasıl kullanacağımı da deneyerek öğrendim.	It was both very entertaining and very educational. I also learned by trying how to use what I learned in class.
4	4	4	4	4	4	4	4	4	4	4	4	4	4	4	4	Daha fazla kendi aramızda speking yaptığımız bir ders olması bence daha verimli olur onun dışında hocama çok teşekkür ediyorum çok iyi ve hoşgörülü bir insan kendisi ile İngilizce öğrenmek daha kolaylaşıyor	I think it would be more productive to have a lesson where we talk more among ourselves. Apart from that, I would like to thank my teacher very much. He is a very good and tolerant person. Learning English becomes easier with him.
3	3	3	3	3	3	3	3	3	3	3	3	3	3	3	3	B	B.
4	4	4	4	4	4	4	4	4	4	4	4	4	4	4	4	Hocamın anlatımı, iletişimi harikaydı kendisine teşekkürlerimi sunarım.	My teacher's explanation and communication was excellent. I would like to thank him.
4	4	4	4	3	4	4	4	4	4	4	4	4	4	4	4	Neredeyse her hafta yapılan ders içi aktivitilerin sayısı çok fazlaydı. Grup ödevlerinin birçoğu kişi fazlalılığında dolayı karmaşık ve düzensiz şekilde ilerledi. Onun dışında hem dersten hem de dersi veren öğretim elemanından memnunum	The number of in-class activities held almost every week was very high. Many of the group assignments proceeded in a complex and disorganized manner due to the large number of people. Other than that, I am satisfied with both the course and the instructor teaching the course.
3	3	3	4	3	3	3	3	2	3	3	3	3	3	3	3	Öncelikle bu dersten dönem boyunca verim alamadığımı belirtmek istiyorum. Bu ders benim için verimli geçmedi. Hocamızın dersi başlatmadan önce bilgisayarında teknik sorunlar çıkması dersin akışını bana göre bozdu. Ve derste hocaya soru sorduğumuzda sorduğumuz sorunun cevabını bilmemesi beni çok üzdü. Temennim bu dersin final sınavından geçebilmek. Eğer geçemezsem bir sonraki Muafiyet sınavında bu…	First of all, I would like to state that I could not get any benefit from this course throughout the semester. This lesson was not productive for me. In my opinion, our teacher's computer had technical problems before starting the lesson, which disrupted the flow of the lesson. And when we asked the teacher a question in class, it made me very sad that he did not know the answer to the question w…
3	3	3	3	3	4	4	4	4	4	4	4	4	4	4	4	Öncelikle derste öğrenmemiz gereken temel/esansiyel bilgilerin tarafıma öğretilmiş olduğunu düşünüyorum. Ben genellikle, elimde olmadan oldukça uzun ve bilgi verici sunumlar hazırlayan bir insanımdır, çünkü hem sunumumla insanları bilgilendirmek isterken hem de gözden kaçırdığım bir noktanın kalmamasını isterim, ancak bir yandan iyi bir sunumun, sunum yapılacak konunun önemli yanlarının vurgulanm…	First of all, I think that I was taught the basic/essential information that we should learn in the course. I am usually a person who prepares very long and informative presentations without my help, because I want to inform people with my presentation and not to miss a point, but on the one hand, I think that a good presentation depends on emphasizing the important aspects of the subject to be p…
4	4	4	4	4	4	4	4	4	4	4	4	4	4	4	4	odev olarak yazi da yazmak iyi bir fikir olabilir response paper gibi	It might be a good idea to write as a homework assignment, like a response paper.
4	4	4	4	4	4	4	4	4	4	4	4	4	4	4	4	Çok şey öğrendim. Hocamıza gönülden teşekkür ederim.	I learned a lot. I would like to thank our teacher wholeheartedly.
4	4	4	4	4	4	4	4	4	4	4	4	4	4	4	4	Ders anlaşılır ve kolaydı.	The lesson was clear and easy.
4	4	4	4	4	4	4	4	4	4	4	4	4	4	4	4	Hocamız konuyu güzel ve açıklayıcı bir şekilde anlattı.	Our teacher explained the subject in a nice and descriptive way.
4	4	4	4	4	4	4	4	4	4	4	4	4	4	4	4	Verimli bi dersti	It was a productive lesson
4	4	3	2	4	2	4	4	3	4	4	4	4	4	4	4	ders işleyişinden de hocamdanda çok memnunum.	I am very pleased with the coursework and my teacher.
4	4	4	4	4	4	4	4	4	4	4	4	4	4	4	4	Eğlenceli bir ders	A fun lesson
4	4	4	4	4	4	4	4	4	4	4	4	4	4	4	4	ÇOK İYİ	VERY GOOD
1	1	1	1	1	1	1	1	1	1	1	1	1	1	1	1	Yani derste sadece toptan 1 konu anlatıldı fakat sınavları tüm detay soruluyor yani bi nevi derste anlatmadığı ama bizden yorum yapmamızı beklediği sorular soruyor	In other words, only one topic was covered in the course, but in the exams, all the details are asked, in a sense, he asks questions that he does not explain in the lecture but expects us to comment on.
3	4	4	3	3	1	2	4	4	4	4	4	4	4	4	4	İlk olarak soruya veya soruna karşı sadece zaten söylediğini, bilgilendirdiğini belirtmesi, ben burayı anlamadım diye sorduğumda bile zaten söyledim demeye devam etmesi ve terslemesi hocaya herhangi bir şey sormaktansa bomboş oturmayı tercih ettirdi. Ayrıca en çok sizin bildiğinizi de farkındayız biz zaten sizden öğrenmek için oradayız. Genel olarak çok iyi instruction verdiğini düşünmesi ama ond…	First of all, the fact that he only stated that he had already said and informed the teacher about the question or problem, and that he continued to say that he had already said it even when I asked him that I did not understand this point, and that he rebuffed him, made the teacher prefer to sit idle rather than ask anything. We also know that you know the most, and we are there to learn from yo…
3	3	3	3	3	3	3	3	3	3	3	3	3	3	3	3	A	A.
3	3	3	3	3	3	3	3	3	3	3	3	3	3	3	3	İİİ	III
4	4	4	4	4	4	4	4	4	4	4	4	4	4	4	4	Teşekkürler	Thanks
3	3	3	3	3	3	3	3	3	3	3	3	3	3	3	3	Verimliydi	It was productive
4	4	4	4	4	4	4	4	4	4	4	4	4	4	4	4	herşey gayet anlaşılır ve açıktı	Everything was very clear and understandable.
4	4	4	4	4	4	4	4	4	4	4	4	4	4	4	4	keyif alarak geldiğim bir ders kendimi verebilseydim çok daha verimli geçirebileceğimi düşünüyorum	I think I would be much more productive if I could teach myself a course that I enjoy.
4	4	4	4	4	4	4	4	4	4	4	4	4	4	4	4	Her şey çok güzeldi.	Everything was beautiful.
3	3	3	3	3	3	3	3	3	3	3	3	3	3	3	3	çok güzel teşekkür ederim	very nice thank you
4	3	4	3	4	3	4	3	4	4	4	4	4	4	4	4	Guzel bir ders	nice lesson
4	4	4	3	3	3	4	4	4	3	3	3	3	3	3	3	Guzel bir ders	nice lesson
4	4	4	4	4	4	4	4	4	4	4	4	4	4	4	4	dönem boyunca ders çok öğreticiydi. Sadece ek olarak daha fazla soru cevap yapılabilir. Bu sayede daha aktif bir ders işlenebilir.	The course was very instructive throughout the semester. Just in addition more questions and answers can be made. In this way, a more active lesson can be taught.
4	4	4	4	2	3	4	4	4	3	3	3	3	3	3	3	Öğretim elemanının öğrencilerine olan önyargısı olumlu ve etkili iletişimimize engel oldu ve bu durum yer yer problemlere yol açtı. İletişime açıklık ile çözülemeyecek herhangi bir problem yoktu. Keşke daha anlayışlı ve pozitif bir ortam yaratılarak bu durum önlenebilseydi. Derste kullanılan kaynak oldukça açıklayıcı olmasına rağmen, öğretim elemanı tarafından benzerlikleri üzerinden bağdaştırıla…	The instructor's prejudice towards his students prevented our positive and effective communication, and this sometimes led to problems. There was no problem that could not be solved with open communication. I wish this situation could have been prevented by creating a more understanding and positive environment. Although the source used in the course was quite descriptive, many concepts with the …
4	4	4	4	4	4	4	4	4	4	4	4	4	4	4	4	TEŞEKKÜR EDERİM	THANK YOU
4	4	4	4	4	4	4	4	4	4	4	4	4	4	4	4	Öğretmenime her şey için teşekkürlerimi sunarım.	I would like to thank my teacher for everything.
3	3	3	3	3	3	3	3	3	3	3	3	3	3	3	3	Olanaklar daha iyi olabilir.	Facilities could be better.
4	4	4	4	4	4	4	4	4	4	4	4	4	4	4	4	çok yararlı ve verimliydi	It was very useful and efficient.
3	3	3	3	4	3	3	3	3	3	3	3	3	3	3	3	İyi	Good
4	4	4	4	4	4	4	4	4	4	4	4	4	4	4	4	Çok tatlı bir kadın kendisini severim	She is a very sweet woman, I like her
4	4	4	4	4	3	4	4	3	4	4	4	4	4	4	4	Dönem sonu verilen projeninin teslim tarihinin sınav haftasında olması ve o projenin sınav haftasıın başında verilmiş olması işlerimizi güçleştirdi.	The fact that the deadline for the project given at the end of the semester was during the exam week and that project was given at the beginning of the exam week made our work difficult.
1	1	1	1	1	1	1	1	1	1	1	1	1	1	1	1	öğretim elemanın ingilizcesinin yetersiz olduğunu düşünüyorum sadece 500 slayt yüklüyor ve derste sadece bu slaytları okuyup geçiyor bu sene 2. alışım ve 2 senedir kendi çabalarımla geçmeye çalışıyorum hocanın bana en ufak katkısı olmamıştır .	I think the instructor's English is inadequate. He uploads only 500 slides and only reads these slides in the course. This is my second time studying and I have been trying to pass with my own efforts for 2 years. The instructor has not helped me in the slightest.
3	2	1	2	2	2	3	3	3	2	2	2	2	2	2	2	hocamı sevmeme rağmen derste anlatılan konu slaytta gösterilen konu ve sınavda çıkan sorular çok uyumsuz	Although I like my teacher, the subject taught in the lecture, the subject shown on the slides and the questions in the exam are very incompatible.
3	2	2	2	3	3	3	2	2	2	2	2	2	2	2	2	Çok zor bir ders hocamız elinden geleni yapıyor ama çok terim var her şey birbirine karışıyor alttan aldığım bir ders	It's a very difficult course, our teacher is doing his best, but there are a lot of terms, everything gets mixed up, it's a lesson I learned from the bottom.
4	3	4	4	4	3	3	4	4	4	4	4	4	4	4	4	Okul çok iyi çok seviyorum	The school is very good, I love it very much
3	4	4	4	2	4	4	4	4	4	4	4	4	4	4	4	Final sınavının hukuk ile bağlantısı oldukça sınırlıydı sorular tıp fakültesi sınavı düzeyindeydi. Ölçücülüğü yoktu.	The final exam's connection with law was quite limited; the questions were at the level of the medical faculty exam. He had no moderation.
4	4	4	4	4	4	4	4	4	4	4	4	4	4	4	4	yeterli	sufficient
4	4	4	4	4	4	4	4	4	4	4	4	4	4	4	4	Çok teşekkür ederim dersiniz mükemmel	Thank you very much, your lesson is perfect
4	4	4	4	4	4	4	4	4	3	3	3	3	3	3	3	Dersin işlenişi ve hocasından memnunum	I am satisfied with the course and the instructor.
4	4	4	4	4	4	4	4	4	4	4	4	4	4	4	4	Çok güzel bir ders ama zor olduğunu düşünüyorum	It is a very good lesson but I think it is difficult.
4	3	2	3	3	1	2	2	4	2	2	2	2	2	2	2	Yapılan sınav ve son haftalarda yapılan sunumlar çok verimsizdi. Sunum yapan öğrencilere çok sert bir tavır vardı. Dersin daha verimli olabileceğini düşünüyorum	The exam and the presentations made in the last weeks were very inefficient. There was a very harsh attitude towards the students making presentations. I think the course could be more productive
3	3	3	3	3	3	3	3	3	3	3	3	3	3	3	3	İçerik ve hocamız iyi	The content and our teacher are good
1	1	1	1	1	1	1	1	1	1	1	1	1	1	1	1	Gereksiz zor bir ders ve herhangi bir kolaylaştırma çabasıda yok	An unnecessarily difficult lesson and no effort to make it easier.
4	4	4	4	4	4	3	3	4	3	3	3	3	3	3	3	Dil becerilerini geliştirmeye oldukça yardımcı bir dersti.	It was a very helpful course to improve language skills.
4	3	3	3	3	3	3	3	3	4	4	4	4	4	4	4	ne iyi ne de kötü bir ders ve dönemdi	It was neither a good nor a bad lesson and period.
4	4	4	4	4	4	4	4	4	4	4	4	4	4	4	4	Yok	None
4	4	4	4	4	4	4	4	4	4	4	4	4	4	4	4	Sağolun hocam	Thank you sir
4	4	4	4	4	4	4	4	4	4	4	4	4	4	4	4	Çok iyi bir eğitimdi	It was a very good education
4	4	4	4	4	4	4	4	4	4	4	4	4	4	4	4	Teşekkürler	Thanks
4	4	4	4	4	4	4	4	4	4	4	4	4	4	4	4	Alan icin oldukca onemli oldugunu dusundugum bir dersti ve Tugba hoca en iyi sekilde anlatti. Dersi anlatis sekli hem ilgi cekici hem de gercekten anlamami sagladi	It was a lesson that I thought was very important for the field and Tugba teacher explained it in the best way. The way he explained the lesson was both interesting and helped me truly understand.
4	4	4	4	4	4	4	4	4	4	4	4	4	4	4	4	İyi	Good
4	4	4	4	4	4	4	4	4	4	4	4	4	4	4	4	Ders bana çok şey kattı teşekkür ederim	The lesson helped me a lot, thank you
1	1	1	1	1	1	1	1	1	1	1	1	1	1	1	1	Ders anlatımını güncel bulmuyorum. Öğrenciler için zor olan bir dersi daha da zorlaştırmak için elinden gelen her şeyi yapıyor. Dersler çok verimsiz geçtiği için öğrenciler dersi dinlemiyor farklı platformlardan çalışarak dersi geçmeye çalışıyorlar. Dersler verimsiz geçmesi nedeniyle bizlerin ilgisi dağılıyor ve dersi ders de öğrenmemizin imkanı yok ve bunun tek sorumlusunu öğrencilere yüklüyor. …	I do not find the lecture up to date. He does everything he can to make a difficult lesson even more difficult for the students. Since the lessons are very inefficient, students do not listen to the lesson and try to pass the lesson by studying from different platforms. Since the lessons are unproductive, our interest is lost and there is no way we can learn the lesson in class, and the students …
4	4	4	4	4	4	4	4	4	4	4	4	4	4	4	4	Dersin öğretim elemani ve ders hakkinda olumsuz dusuncem bulunmamaktadir . Verimli guzel bir donem gecirdik	I have no negative thoughts about the course instructor or the course. We had a nice and productive period.
4	4	4	4	4	4	4	4	4	4	4	4	4	4	4	4	Dersin işlenişi oldukça verimliydi.	The course was taught very efficiently.
4	4	4	4	4	4	4	4	4	4	4	4	4	4	4	4	Öğretim elamanı çok anlayışlı, yardımcı olan ve dersi çok iyi anlatan biriydi. Her şey çok iyiydi.	The instructor was very understanding, helpful and explained the course very well. Everything was very good.
3	3	3	3	3	3	3	3	3	3	3	3	3	3	3	3	Stajla ilgili sözlü olarak yeterli bilgi verildiğini düşünmüyorum. Notlandırma nasıl olacak bunlarla ilgili sıkıntılarımızı paylaşacağımız kimse yoktu.	I do not think that sufficient information was given verbally about the internship. We had no one to share our troubles with regarding how grading would be done.
1	1	1	1	1	1	1	1	1	1	1	1	1	1	1	1	Hocamız sağolsun hem derste kendi anlattığı konulardan bağımsız, hem kendi kitabıyla alakası olmayan bir final sınavı yaparak öğrencilerini mağdur etmeyi başarmıştır.	Thanks to our teacher, he managed to victimize his students by giving a final exam that was both independent of the subjects he taught in class and unrelated to his own book.
4	4	4	3	3	3	3	4	4	4	4	4	4	4	4	4	Öğrencilere sevdirilmesi gereken bir dersken maalesef herkesin sadece geçme kaygısıyla geldiği bir derse dönüştü. Öğrencilerle daha aktif ilgilenilerek verilmesi gereken bir alan olduğu unutulmamalı	While it was a course that should be endeared to students, unfortunately it has turned into a course that everyone comes to only with the anxiety of passing. It should not be forgotten that this is an area that requires more active involvement with students.
4	4	4	4	4	4	4	4	4	4	4	4	4	4	4	4	teşekkürler	thanks
3	3	3	3	3	3	3	3	3	3	3	3	3	3	3	3	Neredeyse hiç soru çözmedik	We solved almost no questions
3	3	3	3	3	3	3	4	3	3	3	3	3	3	3	3	türkçe.	Turkish.
4	4	4	4	4	4	4	4	4	4	4	4	4	4	4	4	Güzel ve keyifli bir dersti.	It was a nice and enjoyable lesson.
4	4	4	4	4	4	4	4	4	4	4	4	4	4	4	4	Yöneylem dersinde tavsiye edilen kitap vardı fakat çözümlü cevapları yoktu bundan dolayı öysye daha fazla çözümlü sorular yüklenebilirdi bu sayede bizim bu dersteki soruları daha iyi anlamamızı sağlardı ayrıca akşam 7?de biten quizler bizleri çok zorladı quizler ders saatinde olmalıydı.	There was a recommended book in the operations course, but it did not have solved answers, so more solved questions could have been uploaded to the course, which would have helped us understand the questions in this course better. Moreover, the quizzes that ended at 7 in the evening were very difficult for us. The quizzes should have been during class time.
4	4	4	4	4	3	2	3	4	4	4	4	4	4	4	4	Dersimizin Genel olarak verimli geçmiş bulunup öğretim üyesi bilgi ve yaklaşım açısından gayet yeterlidir.	Our course was generally productive and the faculty member is quite sufficient in terms of knowledge and approach.
4	4	4	4	4	4	4	4	4	4	4	4	4	4	4	4	Dersin niteliği yüksekti. Fakat vizesi türkçe finali ingilizceydi. Ders notları da türkçeydi bu karmaşıklık yüzünden dersin notları da çok karmaşıktı.	The quality of the course was high. But his visa was in Turkish and his final was in English. The course notes were also in Turkish, and because of this complexity, the course notes were also very complicated.
4	2	2	2	2	4	4	3	3	2	2	2	2	2	2	2	Bölümümüz kapsamında çok önemli olan bu dersimizin kapsamında bulunun tüm konular hakkında geniş çaplı bilgi sahibi olacağım şeklinde bir düşünceyle döneme başlamıştım fakat slaytların yetersizliği ve hocamızın ders işleyiş yönteminin bizim için pek açık olmamasından kaynaklı sınıf olarak yeterli bilgi düzeyine ulaştığımızı düşünmüyorum.	I started the semester with the idea that I would have extensive knowledge about all the subjects covered by this course, which is very important for our department, but I do not think that we have reached the sufficient level of knowledge as a class due to the inadequacy of the slides and the fact that our teacher's teaching method is not very clear to us.
4	4	4	4	3	4	4	4	4	4	4	4	4	4	4	4	Sınav için ya da sınav harici dersin konusu için yardımcı makalelerin paylaşılması dersin kapsamına daha hakim olabilmemiz bakımından oldukça yardımcıydı.Daha fazla belgesel izlenilebilir.Kitaptan araştırma ödevi verilebilir.	Sharing helpful articles for the exam or for the subject of the course outside the exam was very helpful in helping us understand the scope of the course. More documentaries can be watched. Research homework can be given from the book.
4	4	4	4	4	4	4	4	4	4	4	4	4	4	4	4	Hocamıza teşekkür ederim	Thank you to our teacher
3	3	3	4	4	4	4	4	4	4	4	4	4	4	4	4	Her şey çok güzeldi. Hoca'mıza teşekkür ediyorum	Everything was beautiful. I thank our teacher
4	4	4	4	4	4	4	4	4	4	4	4	4	4	4	4	Çok iyi öğretici	very good tutorial
4	4	4	3	3	3	4	4	4	3	3	3	3	3	3	3	Sınav sorularının fazla detaylı sorulduğunu ve sunumların faydalı olmadığını düşünüyorum	I think the exam questions were asked in too much detail and the presentations were not useful.
3	3	3	3	3	3	3	3	3	3	3	3	3	3	3	3	Hocamız gayet iyi bir ders verdi hiç çalışmadan sınavlarda zorlanmadım.	Our teacher gave a very good lesson and I had no difficulty in the exams without studying at all.
4	4	4	4	4	4	4	4	4	4	4	4	4	4	4	4	Hocamız alanında oldukça yetkin. Derslerin de hukukun felsefik yönünü öğrenmek ve yeni bakış açısı kazanmak yönünden faydalı olduğunu düşünüyorum.	Our teacher is very competent in his field. I think the courses are useful in terms of learning the philosophical aspect of law and gaining a new perspective.
4	4	4	4	4	4	4	4	4	4	4	4	4	4	4	4	Çok sevdiğim bir ders	A lesson I love very much.
3	3	3	3	3	3	3	3	3	3	3	3	3	3	3	3	AB	EU
1	1	1	1	1	1	1	1	1	1	1	1	1	1	1	1	X	X
3	3	3	2	3	3	3	3	3	2	2	2	2	2	2	2	Derste işlemediğimiz konuların sınavda çıkması, hocaların sorduğu soruları yanıtsız bırakması	Subjects we did not cover in class appear on the exam, leaving the questions asked by the professors unanswered.
3	3	4	3	3	3	4	3	4	4	4	4	4	4	4	4	Ders içeriği bizler için uygundu anlaşılırdı fakat ilgili dersin öğretim elemanıyla iletişim konusunda sorunlar yaşadım. Derslerde soru sormak için öğretmenden çekiniyordum çünkü bu da benim ders başarımı düşürdü. Bir şeyleri yeni öğrenirken bizlerle olan iletişimde daha anlayışlı olunursa daha da başarılı olacağımızı düşünüyorum.	The course content was suitable and understandable for us, but I had problems communicating with the instructor of the relevant course. I was afraid to ask questions to the teacher during classes because this reduced my success in class. I think we will be more successful if we are more understanding in our communication when we are learning something new.
4	4	4	4	4	4	4	4	4	4	4	4	4	4	4	4	Derste grup halinde yapılan ödevler bizim için çok yararlı olmakta. Ancak grupların öğrenciler tarafından belirlenmesi daha sağlıklı ve etkili bir ödev yapılma ortamı sağlayabilir.	Homework done in groups during class is very useful for us. However, determining groups by students can provide a healthier and more effective homework environment.
4	4	4	4	4	4	4	4	4	4	4	4	4	4	4	4	GJGJ	GJGJ
3	3	3	3	3	3	3	3	3	3	3	3	3	3	3	3	iyi	Good
4	4	4	4	4	4	4	4	4	4	4	4	4	4	4	4	Yok	None
4	4	4	4	4	4	4	4	4	4	4	4	4	4	4	4	Boş	Empty
3	3	3	3	3	3	3	3	3	3	3	3	3	3	3	3	Ders yeterliydi	The lesson was enough
1	1	1	1	1	1	1	1	1	1	1	1	1	1	1	1	Yardımcı olmadı projemle hiç ilgilenmedi her şeyim eksiksiz olmasına rağmen projemi değerlendirmeyeceğini söyledi	He wasn't helpful, he wasn't interested in my project at all, he said he wouldn't evaluate my project even though everything was complete.
4	4	4	4	4	4	4	4	4	4	4	4	4	4	4	4	En heyecanlı olduğum dersti hocamızın sabrına ve emeğine çok teşekkür ederim .	It was the lesson I was most excited about. I would like to thank our teacher for his patience and effort.
4	4	4	4	4	4	4	4	4	4	4	4	4	4	4	4	Çok yeterliydi	It was very enough
3	3	3	3	3	3	3	3	4	3	3	3	3	3	3	3	Finaller de online olsaydı daha güzel olabilirdi	It would have been better if the finals were online too
4	4	4	4	4	4	4	4	4	4	4	4	4	4	4	4	İyi	Good
3	3	3	3	3	3	3	3	3	3	3	3	3	3	3	3	Her şey çok güzeldi emeğinize sağlık hocam	Everything was great, thank you for your work, sir.
4	4	4	4	4	4	4	4	4	4	4	4	4	4	4	4	Yüzyüze daha iyi olur	Face to face is better
4	4	4	4	4	4	4	4	4	4	4	4	4	4	4	4	çok iyiydi.	It was very good.
4	4	4	4	4	4	4	4	4	4	4	4	4	4	4	4	Hocamızın akıcı anlatımıyla ders verimli geçti.	The lesson was productive with our teacher's fluent explanation.
2	2	2	2	2	2	2	2	2	2	2	2	2	2	2	2	iyi	Good
4	4	4	4	4	4	4	4	4	4	4	4	4	4	4	4	ders işleyişi ve alaka çok iyidi	coursework and relevance were very good
3	3	3	3	3	3	3	3	3	3	3	3	3	3	3	3	a	a
4	4	4	4	4	4	3	3	3	3	3	3	3	3	3	3	Teşekkürler	Thanks
2	2	2	3	2	2	2	2	2	2	2	2	2	2	2	2	Dersin çok monoton işleyişi öğrenciyi kötü etkilemektedir.	The very monotonous course of the course affects the student negatively.
3	4	4	4	4	4	3	3	4	4	4	4	4	4	4	4	uzaktan eğitim konusunda birçok eksik ve yetersizlikler olduğunu düşünüyorum, verimli bir dönem olmadı. Uzaktan eğitim ve sınavlarda sorun yaşandı daha da Geliştirilebilir bir konu. umarım zamanla düzeltilebilir	I think there are many deficiencies and inadequacies in distance education, it was not a productive period. There were problems in distance education and exams. This is an issue that can be improved further. I hope it can be fixed in time
3	3	3	3	3	3	3	3	3	3	3	3	3	3	3	3	Derslerin uzaktan eğitim sürecinde pekte faydalı olduğunu söyleyemem çeşke yüz yüze dersler olsaydı daha verimli konular pekiştirile bilirdi.	I cannot say that the lessons were very useful during the distance education process. If there were face-to-face lessons, more productive topics could be reinforced.
4	4	4	4	4	4	4	4	4	4	4	4	4	4	4	4	Çok teşekkür ederim	Thank you very much
3	3	3	3	3	3	3	3	3	3	3	3	3	3	3	3	iyi	Good
1	1	1	1	1	1	1	1	1	1	1	1	1	1	1	1	Sınavlari çok zorluyorlar	They make the exams very difficult
3	3	3	3	3	3	3	3	3	3	3	3	3	3	3	3	Z	Z.
4	4	4	4	4	4	4	4	4	4	4	4	4	4	4	4	Hocamız, Türk siyasi tarihindeki önemli dönüm noktalarını dersin konuları ve gerekli okumalarla paralel olarak kusursuz bir şekilde biz öğrencilere aktarmıştır. Ders içinde yer yer bilgi alışverişlerine yer vermesi ve Türk siyasi tarihindeki iki önemli şahsiyeti incelememiz yönünde verdiği ödevler de kazanımlarımızı pekiştirmiştir. Özellikle dönem ödevini yaparken incelediğim siyasi şahsiyetleri,…	Our teacher has perfectly explained the important turning points in Turkish political history to us students, in parallel with the course topics and required readings. The fact that he occasionally included information exchanges during the course and the homework he gave us to examine two important figures in Turkish political history also reinforced our achievements. Especially while doing my te…
3	3	3	3	3	3	3	3	3	3	3	3	3	3	3	3	dersin hocası öğrencilerden cok sey istiyor bu kadar abartmak saçma hem vize hem final hem ödev çok mükemmelliyetçi bir hoca dersin öğrenim ortamından da kaynaklı anlaşılması çok zor oldu bir sınavda 70 soru sormak öğrenciye zulüm	The teacher of the course demands a lot from the students. It is absurd to exaggerate so much, both midterm, final and homework. The teacher is a perfectionist. It was very difficult to understand the course due to the learning environment. Asking 70 questions in an exam is cruelty to the student.
4	4	4	4	4	4	4	4	4	4	4	4	4	4	4	4	Her şey çok güzeldi hocamızın emeğine sağlık.	Everything was great, thanks to our teacher's efforts.
4	4	4	4	4	4	4	4	4	4	4	4	4	4	4	4	TEŞEKKÜRLER	THANKS
3	3	3	3	3	3	3	3	3	3	3	3	3	3	3	3	Tüm bilgiler deyerli ve faydalı oldu.	All the information was valuable and useful.
4	4	4	4	4	4	4	4	4	4	4	4	4	4	4	4	Hjdjdjd	Hjdjdjd
4	4	4	4	4	4	4	4	4	4	4	4	4	4	4	4	İyi	Good
1	1	1	1	1	1	1	1	1	1	1	1	1	1	1	1	Ders kolay bir ders ve derslere katılım sağlayabildiğimizde sınava yönelik konuşmalar da oldu lakin dersten sorumlu hocamız derslerle ilgili hiçbir bilgilendirme yapmamakla birlikte derslerde çok aksama yaşadık.	The course was an easy one and when we were able to attend the classes, there were conversations about the exam, but since the teacher responsible for the course did not give any information about the lessons, we experienced a lot of disruption in the lessons.
4	4	4	4	4	4	4	4	4	4	4	4	4	4	4	4	FH	F.H.
4	4	4	4	4	4	4	4	4	4	4	4	4	4	4	4	oksey	oksey
4	3	2	2	2	3	4	4	4	3	3	3	3	3	3	3	Slaytların daha öz hemşirelik mesleğine hitap eden şekilde hazırlanması beni bu mesleğe daha iyi hazırlanmama yardımcı olabilir. Sınavların slayttan bire bir cevap beklenmesi yerine bilgiye dayalı bilgiyi ölçen şekilde olması kendimi değerlendirmeme daha yardımcı olabilir, sevgilerimle.	Preparing the slides in a way that appeals more specifically to the nursing profession can help me better prepare for this profession. Having exams that measure knowledge-based knowledge rather than expecting a one-to-one answer from the slide may help me evaluate myself better. Best regards.
4	4	3	3	4	3	4	4	3	4	4	4	4	4	4	4	Dersin içeriği oldukça yararlı ve bireysel öğrenme farklılıklarını dikkate alınmıştır.	The content of the course is very useful and individual learning differences are taken into account.
4	4	4	4	4	4	4	4	4	4	4	4	4	4	4	4	Genel ders akışının verimli gectiğini düşünüyorum.	I think the overall course flow was productive.
3	3	3	3	3	3	3	3	3	3	3	3	3	3	3	3	Guzledi teşekkürler	Thank you
1	1	1	1	1	1	1	1	1	1	1	1	1	1	1	1	Hiç ders işlenmedi sosyal psikoloji adına büyük kayıp	No lessons were taught, a big loss for social psychology.
4	4	4	4	4	4	4	4	4	4	4	4	4	4	4	4	TEŞEKKÜRLER	THANKS
3	3	3	3	3	3	3	3	3	3	3	3	3	3	3	3	Yok	None
4	4	4	4	4	4	4	4	4	4	4	4	4	4	4	4	FGHJ	FGHJ
4	4	4	4	4	4	4	4	4	4	4	4	4	4	4	4	Emekleriniz için teşekkür ederim	Thank you for your efforts
3	3	3	3	3	3	2	3	3	3	3	3	3	3	3	3	laboratuvar dersleri sonucu hep rapor yazdık ama dönem bitmesine rağmen bir tane rapor dahi okunmadı bu yüzden nerede hatam varsa düzeltmeye ne bilgim ne de zamanım oldu.	We always wrote reports as a result of laboratory classes, but even though the semester was over, not a single report was read, so I had neither the knowledge nor the time to correct any mistakes I made.
4	4	4	4	4	4	4	4	4	4	4	4	4	4	4	4	Hem uzaktan hem yüz yüze geçirdiğimiz bir ders dönemi oldu, genel olarak güzeldi ancak belli bir dönem uzaktan yapılması dersten alınan verimi düşürdü.	It was a course period that we spent both remotely and face-to-face. It was generally good, but doing it remotely for a certain period reduced the efficiency of the course.
3	3	3	3	3	3	3	3	3	3	3	3	3	3	3	3	Lütfen şu staj formalarının alt tarafının rengini değiştirin. Beyaz olması hiç hoş olmuyor.	Please change the color of the bottom of these internship uniforms. Being white is not nice at all.
3	3	3	3	3	3	3	3	3	3	3	3	3	3	3	3	Ders kapsamında bilgisayar mühendisliği öğrencilerinin 3 senede gördükleri dilleri biz 1 dönemde görmeye çalışıyoruz. Doğal olarak dersin içeriği çok yoğun bu olay da dersi zorlaştırmaktadır. Ayrıca sınavların da derste çözülen örneklerle alakası yoktur, zorluk düzeyi çok farklıdır.	Within the scope of the course, we try to see the languages ​​that computer engineering students learn in 3 years in 1 semester. Naturally, the content of the course is very intense, which makes the course difficult. In addition, the exams have nothing to do with the examples solved in the course, their difficulty level is very different.
4	4	4	4	4	4	4	4	4	4	4	4	4	4	4	4	Dersin öğrenim niteliği yüksek hocamız çok öğretici bir şekilde derslerini verdi	Our instructor, who has high educational qualifications, gave his lessons in a very instructive manner.
4	4	4	4	4	4	3	4	4	4	4	4	4	4	4	4	Eğitim deneyimimden , hocamızın öğrencilerle olan iletişiminden, öğrenmemize olan katkısından memnunum.	I am satisfied with my educational experience, our teacher's communication with the students, and his contribution to our learning.
4	4	4	4	4	3	4	4	4	4	4	4	4	4	4	4	Her şey olması gerektiği gibiydi, kişisel olarak ders dilinin İngilizce olmasıyla ilgili bir sıkıntı yaşamasam da %30 İngilizce programında olanların ders dili Türkçe olmasına rağmen bu dersi İngilizce almak zorunda bırakılması yine de eksi bir durum.	Everything was as it should be, although I personally do not have a problem with the course language being English, it is still a negative situation that those who are in the 30% English program are forced to take this course in English even though the course language is Turkish.
4	4	4	4	4	4	4	4	4	4	4	4	4	4	4	4	İçerik açısında güzel ve öğretici bir ders	A nice and instructive course in terms of content
4	4	4	4	4	4	4	4	4	4	4	4	4	4	4	4	Emekleriniz için teşekkür ederim.	Thank you for your efforts.
4	4	4	4	4	4	4	4	4	4	4	4	4	4	4	4	Bazen derslerde biz şu an niçin bunu bu şekilde işliyoruz diyordum ancak haftalar geçtikçe bize farklı bir bakış açısı kazandırdığınızı gördüm. Her şey için teşekkür ederim hocam.	Sometimes in classes I would wonder why we were teaching it this way right now, but as the weeks went by, I saw that you gave us a different perspective. Thank you for everything, sir.
4	4	4	4	4	4	4	4	4	4	4	4	4	4	4	4	iyiydi	it was good
4	4	4	4	4	4	4	4	4	4	4	4	4	4	4	4	Öğretim görevlisi hocamdan çok memnundum şimdiye kadar en memnun kaldığım ve keyif aldığım ders oldu emekleri için teşekkürler.	I was very pleased with my lecturer, it was the course I was most satisfied with and enjoyed so far, thank you for your efforts.
4	4	4	4	4	4	4	4	4	4	4	4	4	4	4	4	İyiydi.	It was fine.
4	4	4	4	4	4	4	4	4	4	4	4	4	4	4	4	Yüzyüze olsa daha iyi olurdu	It would be better face to face
4	4	4	4	4	4	4	4	4	4	4	4	4	4	4	4	Latince bilgimizin yetersiz oluşu ve sınavın komple klasik olması bizim için epey bir zor oldu ezberlemek konusunda. Belki bi sonraki sınavda eşleştirmeler be boşluk doldurmalarla çağrışım yapabiliriz şimdiden teşekkür ederim.	Since our knowledge of Latin was insufficient and the exam was completely classical, it was quite difficult for us to memorize it. Maybe we can make associations with matching and filling in the blanks in the next exam. Thank you in advance.
4	4	4	4	4	4	4	4	4	4	4	4	4	4	4	4	Teşekkürler hocam :)	Thank you teacher :)
2	2	2	2	2	2	2	2	2	2	2	2	2	2	2	2	anlatımını açık ve anlaşılır bulamadım ve derse kimseyi katmayarak devam etti bu da çok sıkıcı geçmesini sağladı. Sınıf hakimiyetini de sağlayamadığını düşünüyorum	I could not find his explanation clear and understandable, and he continued the lesson without involving anyone, which made it very boring. I think he couldn't achieve class dominance either.
4	4	4	4	4	4	4	4	4	4	4	4	4	4	4	4	Her şey için çok teşekkür ederim.	Thank you very much for everything.
4	4	4	4	4	4	4	4	4	4	4	4	4	4	4	4	Dersler çok iyi ve düzenli olarak işlendi	Lessons were taught very well and regularly
3	3	3	3	3	3	3	4	4	4	4	4	4	4	4	4	Moleküler biyoloji ve genetik bölümü kapsamında beklediğim içerikler yoktu. Promotor tahminleme, DNA dizileme, gen bölgesi tahminlemeleri, DNA manipülasyonu, 3D protein görselleştirme gibi konuların ağırlıklı olmasını beklerdim ama genel olarak istatistik ve ekoloji ağırlıklı bir ders oldu.	There were no contents I expected within the scope of the molecular biology and genetics department. I expected topics such as promoter prediction, DNA sequencing, gene region predictions, DNA manipulation, and 3D protein visualization to be predominant, but overall it was a course focused on statistics and ecology.
4	4	4	4	4	4	4	4	4	4	4	4	4	4	4	4	İyi	Good
4	4	4	4	4	4	4	4	4	4	4	4	4	4	4	4	Herşey çok iyiydi	Everything was great
4	4	4	4	4	4	4	4	4	4	4	4	4	4	4	4	hocamın slaytları çok anlaşılır olmasa da dönem boyunca tüm bilgilerini bize aktardı. güzel bir dönemdi teşekkür ederim	Even though my teacher's slides were not very understandable, he conveyed all his information to us throughout the semester. It was a good time, thank you.
3	3	3	3	3	3	3	3	3	3	3	3	3	3	3	3	İyi	Good
1	1	1	1	1	1	1	1	1	1	1	1	1	1	1	1	Dersin başında dersin birinci dönemden program öğretildiğinin açıklaması yapılmadı. Program bilgisi online üzerinden çok zorladı	At the beginning of the course, it was not explained that the program was taught from the first semester of the course. Program information was very difficult online.
4	4	4	4	4	4	4	4	4	4	4	4	4	4	4	4	maketlerle anlatım online eğitim yüzünden yapılmadı ve bu durum öğrenmemin önüne geçti aklımda canlandırmam çok daha zordu.	Explanation with models was not done due to online education and this prevented me from learning and it was much more difficult to visualize it in my mind.
3	3	3	3	3	3	3	3	3	3	3	3	3	3	3	3	Yeterli	Sufficient
4	4	4	4	4	4	4	4	4	4	4	4	4	4	4	4	dünyanın en tatlı hocası sizsiniz. Depremden dolayı yaşadığım en kötü günlerimde sizi hep yanımda hissettim. bir öğretmenden çok daha fazlası oldunuz. iyi ki varsınız	You are the sweetest teacher in the world. I always felt you with me during my worst days due to the earthquake. You have become much more than a teacher. I'm glad to have you
4	4	4	1	1	4	4	4	4	4	4	4	4	4	4	4	Vize sınavı tam bir felaketti.	The midterm exam was a disaster.
4	4	4	4	4	4	4	4	4	4	4	4	4	4	4	4	Hocanın derse hazır oluşu ve hakimiyeti çok iyiydi. Dersten keyif aldım hocanın bizlere karşı olan nazik tutumunu da çok sevdim.	The teacher's preparation and command of the lesson was very good. I enjoyed the lesson and I also loved the kind attitude of the teacher towards us.
3	3	3	3	3	3	3	3	3	3	3	3	3	3	3	3	Sınav şartları zordu teams üzerinden yapılan vize özellikle	Exam conditions were difficult, especially the visa through teams.
4	4	4	4	4	4	4	4	4	4	4	4	4	4	4	4	çok zor soruyor eğer böyle zor soracaksa derste daha çok üzerinde durabilir zor soruların. çok bilgili bir hoca.	He asks very difficult questions. If he is going to ask such difficult questions, he can focus more on difficult questions in class. He is a very knowledgeable teacher.
4	4	4	4	4	4	4	4	4	4	4	4	4	4	4	4	Yüzyüze eğitimin zorunluluğu bölümümüz açısından daha teşvik edici fakat imkanlar ve yaşananlar dahilinde güzel bir dönem oldu hocamıza teşekkürler	The necessity of face-to-face education is more encouraging for our department, but it was a good period within the possibilities and experiences. Thank you to our teacher.
1	1	1	1	1	1	1	1	1	1	1	1	1	1	1	1	keşke daha anlaşılır anlatılsaydı bu ders	I wish this lesson was explained more clearly.
4	4	4	4	4	4	4	4	4	4	4	4	4	4	4	4	Her şey için teşekkürler hocam:)	Thank you for everything sir :)
4	4	4	4	4	4	4	4	4	4	4	4	4	4	4	4	Genel olarak güzeldi	It was nice overall
4	4	4	4	4	4	4	4	4	4	4	4	4	4	4	4	dersten memnundum	I was happy with the lesson
4	4	4	4	4	4	4	4	4	4	4	4	4	4	4	4	Öğretim elemanımız her zaman bize elinden geldiği kadar yardımcı olmaya çalıştı ve bu zor dönemde hiçbir öğrencinin mağdur olmasına sebep olmadı.	Our instructor always tried to help us as much as he could and did not cause any student to suffer during this difficult period.
4	4	4	4	4	4	4	4	4	4	4	4	4	4	4	4	Dersin niteliği ve Öğretim görevlimizin değerli katkılarından dolayı çok teşekkür ederim.	I would like to thank you very much for the quality of the course and the valuable contributions of our instructor.
4	4	4	4	4	4	4	4	4	4	4	4	4	4	4	4	Dersin içeriği sosyoloji anlamında çok katkısı oldu hocamız kibar eğlenceli ve anlayışlıydı uzaktan eğitimde sıkıntı yaşamadım	The content of the course contributed a lot in terms of sociology, our teacher was polite, entertaining and understanding, I had no problems with distance education.
4	4	4	4	4	4	4	4	4	4	4	4	4	4	4	4	Kusursuz, 4-4'lük ne derseniz. Bütünüyle örnek alınması gereken bir öğretim elemanı ve asistanı. Eleştirilebilecek tek konu şudur:İki MATLAB ödevi sadece denklem sonucunu almak söz konusu olduğunda genel anlamda yetersiz kalıyor. MATLAB ödevleri en az 4 tane olmalı ve içinde Laplace Z transform, Sampling ve Frequency Analysis (Fourier Transform) örneklerini barındırmalıdır. Bu kapsamda quiz bile …	Perfect, 4-4 whatever you say. A lecturer and assistant who should be taken as an example. The only thing that can be criticized is this: The two MATLAB assignments are generally inadequate only when it comes to getting the result of the equation. MATLAB assignments must be at least 4 and include Laplace Z transform, Sampling and Frequency Analysis (Fourier Transform) examples. In this context, a…
4	4	4	4	4	4	4	4	4	4	4	4	4	4	4	4	Derslerin işleyişi harika ama akıllı sistemler kullanılmalı	The functioning of the courses is great, but smart systems should be used
4	4	4	4	4	4	4	4	4	4	4	4	4	4	4	4	Favorite danışman hocam >3 :)	Favorite advisor >3 :)
3	3	3	3	3	3	3	3	3	3	3	3	3	3	3	3	Alanının en iyisi olan hocadan ders aldığıma memnunum fakat kendisi, kendi yazdığı kitabı okuyor, haklı olarak yaşı gereği zaten tam teşekküllü ders anlatmasını bekleyemem ama artık emekli olmasında fayda olduğunu düşünüyorum.	I am glad that I took lessons from the teacher who is the best in his field, but he is reading the book he wrote himself, and rightfully so, I cannot expect him to give full-fledged lessons due to his age, but I think it would be beneficial for him to retire now.
4	4	4	4	4	4	4	4	4	4	4	4	4	4	4	4	bilgi aktarımı çok yoğundu çok yorucu bir süreçti.	Information transfer was very intense and a very tiring process.
3	3	3	3	3	3	3	3	3	3	3	3	3	3	3	3	Bence hoca dersi çok efektif bir şekilde anlatamıyor ve ingilizcesinin yeterli olduğunu düşünmüyorum	I think the teacher cannot explain the lesson very effectively and I do not think his English is sufficient.
4	4	1	2	2	3	4	4	4	4	4	4	4	4	4	4	Derslerin ne uzaktan ne yüzyüze olduğu bir ortamda sınavda insanlardan başarı beklenmesi oldukça alakasız. Listining sınavlarının anlaşılır düzeyden çok daha yüksek olması sınavın amacını belirleniyor. Öğretmek mi yoksa sınavı geçmek asıl amacı iyi değerlendiremediğiniz için mağdur öğrenci oluyor. Hazırlık bölümünü bitiren birisinin İngilizce'ye hakim olması gerekir ama bu sistemde bu imkansız gö…	In an environment where classes are neither remote nor face-to-face, expecting success from people in the exam is quite irrelevant. The purpose of the exam is determined by the fact that the listing exams are at a much higher than understandable level. Since you cannot evaluate the main purpose, whether it is teaching or passing the exam, the student becomes the victim. Someone who has completed …
4	4	4	4	4	4	4	4	4	4	4	4	4	4	4	4	Öğrencisiyle birebir iletişim kuran, tüm soruları yanıtlayan, son derece yardımcı ve anlayışlı bir hoca. Her şey için çok ama çok teşekkür ederim kendisine.	He is an extremely helpful and understanding teacher who communicates one-on-one with his students, answers all questions. I thank him very, very much for everything.
3	2	2	2	2	2	3	3	3	3	3	3	3	3	3	3	Derste kullanılan ders föyü derlenmeli.Çözümler hiç anlaşılır değil karmakarışık.Tek ders içeriği olarak bu sunulduğu için bu içeriğe mahkum edildik ama bu föy çok karışık sırası doğru değil.Çözümler eksik ya da atlamalı .	The course leaflet used in the course should be compiled. The solutions are not understandable at all and are confusing. We were condemned to this content because it was presented as the only course content, but this leaflet is very complicated and the order is not correct. Solutions are missing or skipped.
4	4	4	4	4	4	4	4	4	4	4	4	4	4	4	4	Dersin içeriği ile uyumu çok iyi. Öğretim elemanının derse katılan öğrencilerle iletişimi iyi. Hocamı ve dersi çok sevdim. Hocam dönem boyunca bizlerle çok ilgiliydi.	It fits very well with the course content. The instructor has good communication with the students attending the course. I loved my teacher and the course. My teacher was very interested in us throughout the semester.
4	3	3	4	4	3	3	3	3	3	3	3	3	3	3	3	Hocamız ders kapsamında güzel anlatmış olsa da konuların içeriği bize ne katmayı amaçlıyor tam olarak anlamadım. Hoca sebebiyle değil ama ders içeriği sebebiyle verimsiz bir ders.	Even though our teacher explained the course well, I did not fully understand what the content of the subjects intended to add to us. It is an inefficient course, not because of the teacher but because of the course content.
4	4	4	4	4	4	4	4	4	4	4	4	4	4	4	4	Çok verimli bir dersti ve derste dinlediklerimle yaptım ne yapabildiysem onun sayesinde teşekkürler	It was a very productive lesson and I did everything I could with what I heard in the lesson, thank you.
4	4	4	4	4	4	4	4	4	4	4	4	4	4	4	4	Etkin bir dere anlatımı var	There is an effective stream expression
4	4	4	4	4	4	4	4	4	4	4	4	4	4	4	4	Verimli bir dersti teşekkürler	It was a productive lesson, thank you.
4	4	4	4	3	4	4	4	4	4	4	4	4	4	4	4	Mümkünse öğrencilere sunulan notlar ppt dışında başka bir formatta (docx , pdf vb) sunulabilir ve geliştirilebilir. Ders dışında tekrar yaparken öğrencilere yardımı olacaktır.	If possible, the notes presented to students can be presented and developed in a format other than ppt (docx, pdf, etc.). It will help students when revising outside of class.
3	3	3	3	3	2	3	3	3	3	3	3	3	3	3	3	Verilen grup ödevinde, grup dışında kalan öğrencilerin hangi gruba gireceği konusunun dersin hocası tarafından önceden ayarlanıp öğrencilere bildirilmesi önemle rica olunur. Ayrıca ders içinde vakalara daha fazla ve açıklayıcı bir şekilde yer verilebilirdi.Saygılar...	In the group assignment given, it is important that the instructor arranges in advance which group the students who are out of the group will be placed in and informs the students. Additionally, the cases could have been included more and in a more descriptive way in the course. Regards...
4	4	4	3	4	4	4	4	4	4	4	4	4	4	4	4	Güzel	Beautiful
4	4	4	4	4	4	4	4	4	4	4	4	4	4	4	4	İyi	Good
3	3	3	3	3	3	3	3	3	3	3	3	3	3	3	3	Speakingler arttırılmalı	Speaking should be increased
4	4	4	4	2	3	2	3	4	3	3	3	3	3	3	3	Ders konularını maalesef yetiştiremedik ve son konuyu online olarak eski kayıtlardan izlemek zorunda kaldık. Sınava 1 hafta kala bunun olması biraz panik yaşamama sebep oldu. Bu konu dışında ders içeriği veya hocamız ile ilgili herhangi bir sorun yaşamadım.	Unfortunately, we could not complete the course topics and had to watch the last topic online from old recordings. This happening 1 week before the exam caused me to panic a bit. Other than this issue, I did not have any problems with the course content or our instructor.
3	4	4	1	1	4	4	4	4	4	4	4	4	4	4	4	Dersi ve hocanın anlatımını çok beğenmeme rağmen dersin kitabının olmaması çalışma açısından beni zorladı hoca bu dersin tek bir kitabı yok dedi ancak birkaç kitap almak hem maddi açıdan hemde ders çalışma süresi açısından zorlayıcı	Although I liked the course and the instructor's explanation very much, not having a textbook made me difficult in terms of studying. The instructor said there is not a single book for this course, but buying a few books is challenging both financially and in terms of study time.
4	4	4	4	4	4	3	3	3	3	3	3	3	3	3	3	Öğretmenden ve dersten çok verim aldım	I got a lot of benefit from the teacher and the lesson.
4	4	4	4	4	4	4	4	4	4	4	4	4	4	4	4	Teşekkürler	Thanks
4	4	4	4	4	4	4	4	4	4	4	4	4	4	4	4	Hepsi çok yararlıydı	It was all very useful
4	4	4	4	4	4	4	4	4	4	4	4	4	4	4	4	Ders amacına ulaştı	The lesson achieved its goal
3	3	3	3	3	3	3	2	2	1	1	1	1	1	1	1	Dersle ilgili soru çözümü neredeyse hiç olmadı. Umarım daha sonraki dönemlerde daha çok soru çözümü yapılır çünkü sayısal bir ders olduğu için slayttan oku geç şeklinde pek olmuyor çözümlerini kendimiz anlamaya çalıştık	There were almost no solutions to questions related to the course. I hope there will be more question solutions in the following semesters because since it is a numerical course, it is not possible in the form of read from the slide and pass, we tried to understand the solutions ourselves.
4	4	4	4	4	4	4	4	4	4	4	4	4	4	4	4	Bu ders için puanlandırma %40 vize, %60 finaldi. Bence bu ders için bir de proje veya ödev gibi bir şey olsa çok güzel olurdu. %20 ödev/proje, %30 vize ve %50 final sınavı olsa daha güzel olurdu.	Grading for this course was 40% midterm, 60% final. I think it would be great if there was something like a project or homework for this course. It would be better if 20% homework/project, 30% midterm and 50% final exam.
3	3	3	4	3	4	3	3	4	3	3	3	3	3	3	3	Öğretim elemanının çabasına rağmen ulaşılabilirlikte ufak problemler yaşadım. Dersin yakınlaştığı vakit (5 dakika kala) moodle(öys) genellikle çöküyor. Linke erişim şeklinin revize edilmesi faydalı olabilir.	Despite the instructor's efforts, I had minor problems with accessibility. When the lesson gets closer (5 minutes before), moodle usually crashes. It may be useful to revise the way of accessing the link.
4	4	4	4	4	4	4	4	4	4	4	4	4	4	4	4	DERSİMİZİN HOCASI İÇİN İLK KULLANACAĞIM İFADE TUTARLILIK OLUR. İLK DERSTEN SON DERSE HATTA FİNAL SINAVINA KADAR DERSİN AMAÇLARINI BİZDEN BEKLENTİLERİNİ ÇOK NET İFADE ETTİ VE BEKLENTİSİ ÖLÇÜSÜNDE DERSİ İŞLEYİP SINAV YAPTI. DERSİMİZ TEKNİK VE NİSPETEN ZOR OLMASINA RAĞMEN HER ŞEY BEKLEDİĞİM GİBİYDİ. BU YÜZDEN TEŞEKKÜR EDERİM	THE FIRST EXPRESSION I WOULD USE FOR THE TEACHER OF OUR COURSE IS CONSISTENCY. FROM THE FIRST LESSON TO THE LAST LESSON AND EVEN UP TO THE FINAL EXAM, HE EXPRESSED THE OBJECTIVES OF THE COURSE AND HIS EXPECTATIONS FROM US VERY CLEARLY, AND HE TAUGHT THE COURSE AND TAKEN THE EXAM AS PER HIS EXPECTATIONS. EVEN THOUGH OUR COURSE WAS TECHNICAL AND RELATIVELY DIFFICULT, EVERYTHING WAS AS I EXPECTED. S…
2	2	2	2	2	2	2	2	2	2	2	2	2	2	2	2	online ders olması çok sıkıntıya soktu	Having online classes caused a lot of trouble
4	4	4	4	4	4	4	4	4	4	4	4	4	4	4	4	Verimli ve öğretici bir dersti.	It was a productive and instructive lesson.
4	4	4	4	4	4	4	4	4	4	4	4	4	4	4	4	Bir dönem boyunca çok eğlenerek ve aynı zaman da öğrenerek vakit geçirdiğim bir dersti. Hocamıza da göstermiş olduğu emeklerinden dolayı çok teşekkür ediyorum.	It was a course in which I spent a semester having fun and learning at the same time. I would like to thank our teacher very much for his efforts.
3	3	4	3	3	4	3	4	4	3	3	3	3	3	3	3	ders içeriği ve dersi anlatan hocamız gerçekten etkileyici bi performans gösteriyordu herhangi bir problem yaşamadık güzel sade ve açık bir dille anlatıyordu dersleri gayet anlaşılır bir dersti.	The course content and our teacher who explained the course showed a really impressive performance. We did not experience any problems. He explained the lessons in a nice, simple and clear language, and it was a very understandable course.
4	4	4	4	4	4	4	4	4	4	4	4	4	4	4	4	verimli derslerdi öğretim elemanımıza teşekkürler	It was a productive lesson, thank you to our instructor.
4	4	4	4	4	4	4	4	4	4	4	4	4	4	4	4	Memnun kaldığım bir dersti	It was a course that I enjoyed.
2	2	1	1	1	1	1	1	1	1	1	1	1	1	1	1	Bir önerim yok	I don't have a suggestion
3	3	1	1	1	2	2	3	3	2	2	2	2	2	2	2	öğretmen ders verilen subelerde ogrencilere farkli yaklaşıyor, diger subede daha detayli ve bilgili anlatiyor. 2 hafta boyunca sinavda çıkmayacak konular islendi, vize kagitlarinin kontrol edilmesine izin vermedi. kitap, etbis ve slaytta yer alan cumlelerin kullanilmasina ragmen dusuk notlandirilma yapıldı ve kontrol edemedik.	The teacher approaches the students differently in the branches where he teaches, and explains in more detail and knowledge in the other branch. For 2 weeks, subjects that would not appear in the exam were covered, and visa papers were not allowed to be checked. Despite the use of the sentences in the book, etbis and slide, low grading was done and we could not control it.
4	4	4	4	4	4	4	4	4	4	4	4	4	4	4	4	iyiydi	it was good
2	4	3	3	2	2	1	3	4	3	3	3	3	3	3	3	bazı uygulamaların katkı sağlamadığını düşünüyorum	I think some applications do not contribute
4	4	4	4	4	4	4	4	4	4	4	4	4	4	4	4	Çok memnunum	I am very satisfied
4	4	4	4	4	4	4	4	4	4	4	4	4	4	4	4	herhangi bir sorun olmadı	there were no problems
3	3	3	3	3	3	3	3	3	3	3	3	3	3	3	3	Ders çok zor	The lesson is very difficult
3	4	3	4	3	4	4	3	3	4	4	4	4	4	4	4	Güzeldi.	It was beautiful.
4	4	4	4	4	4	4	4	4	4	4	4	4	4	4	4	Aldığımız diğer derslerin sınavların göre çok çok daha b ilgimizi ölçen sınavlar yapıldı hocamıza çok teşekkür ederim. dönem boyunca böyle sınava hasret kalmıştık. ders bize güzel bilgiler kattı.	I would like to thank our teacher for exams that measured our knowledge much more than the exams of other courses we took. We have been longing for such exams throughout the semester. The lesson gave us good information.
4	4	4	4	4	4	4	4	4	4	4	4	4	4	4	4	hocamızın bilgilerinden faydalanarak öğrenmek bizler için çok büyük bir şans hocamıza emekleri için çok teşekkür ederim	It is a great chance for us to learn by benefiting from our teacher's knowledge. I would like to thank our teacher very much for his efforts.
4	4	4	4	4	4	4	4	4	4	4	4	4	4	4	4	?	?
4	4	4	4	4	4	4	4	4	4	4	4	4	4	4	4	Ders çok zordu ama öğretmenimiz bizim daha net anlamamız için elinden geleni yaptı ders anlatımı da çok güzeldi	The lesson was very difficult, but our teacher did his best to make us understand it more clearly, and his lecture was very good.
4	4	4	4	4	4	4	4	4	4	4	4	4	4	4	4	Konferansları bilgilendiriciyi.	Informative conferences.
1	1	1	1	1	1	1	1	1	1	1	1	1	1	1	1	Sınav soruları dersten anlatılan içerikten zordu. Canlı derste ekrana herhangi bir materyal yansıtılmaması işimizi zorlaştırdı	The exam questions were harder than the content covered in the course. Not having any material projected on the screen during the live lesson made our job difficult.
4	4	4	4	4	4	4	4	4	4	4	4	4	4	4	4	Hocamıza emeklerinden dolayı teşekkür ederim.	I would like to thank our teacher for his efforts.
4	3	4	4	4	3	3	4	3	3	3	3	3	3	3	3	Ders gayet faydalıydı her ne kadar devam zorunluluğu olmasa da kaliteli bir dersti	The course was very useful, although attendance was not required, it was a quality course.
4	4	4	4	4	4	4	4	4	4	4	4	4	4	4	4	BİL105 derslerindeki gibi bir ortamın sağlanması zor olsa da bil101de de bütün öğrencilerin canlı bir şekilde kod yazıp çalıştırabileceği bir ortam hazırlanması güzel olur.	Although it is difficult to provide an environment like the BİL105 courses, it would be nice to create an environment where all students can write and run code live in Bil101.
1	1	1	1	1	1	1	1	1	1	1	1	1	1	1	1	dersten hiç memnun değildim çünkü o kadar şey yazıp sınavdan 20 aldım	I wasn't happy with the course at all because I wrote so much and got a 20 on the exam.
4	4	4	4	4	4	4	4	4	4	4	4	4	4	4	4	Teşekkürler..	Thanks..
4	4	4	4	4	3	4	4	4	3	3	3	3	3	3	3	Hocamızın konuya hakimiyeti çok iyi. Akademik yoğunluk ve teknolojik aksaklıklar dışında ders gayet pozitif geçti. Giriş dersi olarak kendimi hazır hissediyorum. Teşekkür ederim.	Our teacher has a very good command of the subject. Apart from academic intensity and technological disruptions, the course was very positive. As an introductory course, I feel ready. Thank you.
4	4	4	4	4	4	4	4	4	4	4	4	4	4	4	4	Ders benim için verimli ve keyifliydi. Teşekkürler.	The lesson was productive and enjoyable for me. Thanks.
4	4	4	4	4	4	4	4	4	4	4	4	4	4	4	4	Tüm fakültelerin aldığı bir ders olduğundan derse girmek için öys sistemine girmeye çalıştığımızda sistem hata veriyordu ve bu yüzden dersin linkine ulaşım zor oldu.	Since it is a course taken by all faculties, when we tried to enter the ÖYS system to take the course, the system gave an error and therefore it was difficult to access the link of the course.
4	4	4	4	4	4	3	4	4	4	4	4	4	4	4	4	Moodle'a çöktüğünden dolayı giremediğimizden derse girişlerde zorluk yaşanıyordu.	We were having difficulty logging into the course because we could not log in to Moodle because it had crashed.
3	3	3	3	3	3	3	3	3	3	3	3	3	3	3	3	Bilgilendirici kolay anlaşılır sosyal dersler	Informative, easy-to-understand social lessons
4	4	4	4	4	4	4	4	4	4	4	4	4	4	4	4	Hocamızın derse olan hakimiyeti çok güzeldi, kendisinin gerek tecrübesi gerek bilgisi olsun derse olan ilgimizi hayli artırdı. Hocamızın emeğine sağlık.	Our teacher's command of the course was very good, and his experience and knowledge greatly increased our interest in the course. Thank you for our teacher's efforts.
3	3	3	3	3	3	3	3	3	3	3	3	3	3	3	3	Gerekli bir ders :)	A necessary lesson :)
4	4	4	4	4	4	4	4	4	4	4	4	4	4	4	4	Teşekkür ederim.	Thank you.
4	4	4	4	4	4	4	4	4	4	4	4	4	4	4	4	DERS ÇOK İYİYDİ	THE COURSE WAS VERY GOOD
4	4	4	4	4	4	4	4	4	4	4	4	4	4	4	4	dersinde asla sıkılmayıp keyifle dinledim. çok akıcı ve kalıcı bir dersti benim adıma.	I never got bored during his lecture and listened with pleasure. It was a very fluent and permanent lesson for me.
2	2	2	2	2	2	2	2	2	2	2	2	2	2	2	2	dersin işleyişi çok güzel ve düzenliydi	The course was very nice and organized.
4	4	4	4	4	4	4	4	4	4	4	4	4	4	4	4	Kolay bir ders	It's an easy lesson
3	3	3	3	3	3	3	3	3	3	3	3	3	3	3	3	çok güzel teşekkür ederim	very nice thank you
4	4	3	4	4	3	3	4	4	3	3	3	3	3	3	3	Yok	None
3	3	3	3	2	2	2	3	4	4	4	4	4	4	4	4	Hocamızla ilgili bir sorun yok, kendisi sağ olsun. Ancak ders çok ağır. Biz sözelciler çok zorlanıyoruz. Finans önemli ama bu tür hesaplamaları yapmak yerine belki biraz daha teori şeklinde ilerlense iyi gibi. Herkes dersten kopuyor ve ilerleme sağlanmıyor. Vizede herkes dökülünce finale olan motivasyon da gidiyor. Zorunlu ders olmasa kimse almaz bu dersi.	There is no problem with our teacher, thank you. But the lesson is very heavy. We verbalists are having a hard time. Finance is important, but instead of making such calculations, it seems better to proceed a little more theoretically. Everyone breaks away from the lesson and no progress is made. When everyone leaves midterm, the motivation for the final goes away. If it wasn't a compulsory cours…
2	2	2	2	2	2	2	2	2	2	2	2	2	2	2	2	çok yakınımın kaybından kaynaklı olarak vize sınavına giremedim ve maalesef ki telafi sınavında aşırı derecede zorlandım. vize zamanı sınava girmiş olsaydım bu kadar zorlanacağımı düşünmüyorum.	Due to the loss of a very close relative, I could not take the midterm exam and unfortunately, I had extreme difficulty in the make-up exam. I don't think I would have had this much difficulty if I had taken the exam during the midterm period.
2	2	2	2	2	2	2	2	2	2	2	2	2	2	2	2	Dersin yönetimi çok iyiydi	Course management was very good
4	1	1	1	1	1	1	1	1	1	1	1	1	1	1	1	Mükemmel	Perfect
4	4	4	4	4	4	4	4	4	4	4	4	4	4	4	4	Dersin işleyişi akıcı ve öğreticiydi.	The course process was fluent and instructive.
4	4	4	4	4	4	4	4	4	4	4	4	4	4	4	4	Hocamız çok ilgili çok ilgili ve alakalıydı	Our teacher was very caring and relevant.
4	4	4	4	4	4	4	4	4	4	4	4	4	4	4	4	Hocama staj süreci boyunca verdiği destekleri için teşekkür ediyorum. Aklımdaki sorulara her zaman cevap alabildim ve herhangi bir sorun yaşadığımda hocamız elinden geldiğince bize yardım etmeye çalıştı. Destekleri için teşekkür ediyorum.	I would like to thank my professor for his support throughout the internship process. I was always able to get answers to the questions I had, and when I had any problems, our teacher tried to help us as much as he could. Thank you for your support.
4	4	4	4	4	4	4	4	4	4	4	4	4	4	4	4	nakaadldxa	nakaadldxa
4	4	4	4	4	4	4	4	4	4	4	4	4	4	4	4	Iyi ki aldim dediğim her dersi severek dinlediğim dertir.	I am glad that I took every lesson that I listened to with pleasure.
4	4	4	4	4	4	4	4	4	4	4	4	4	4	4	4	Her şey olması gerektiği gibi	Everything is as it should be
3	3	3	3	3	3	3	3	3	3	3	3	3	3	3	3	iyi	Good
3	3	3	3	3	3	3	3	3	3	3	3	3	3	3	3	Güzel	Beautiful
4	4	4	3	3	3	4	4	4	4	4	4	4	4	4	4	Dersin içeriği çok yüksek hayatımıza katkısı yüksek.	The content of the course is very high and its contribution to our lives is high.
4	4	4	4	4	4	4	4	4	4	4	4	4	4	4	4	Hoca çok iyi anlatıyor ancak diğer şubelerle sınav zorluk farkı inanılmaz. Her şube aynı zorlukta sınava girmeli.	The teacher explains very well, but the difference in exam difficulty with other branches is incredible. Every branch should take the exam with the same difficulty.
4	4	4	4	4	4	4	4	4	4	4	4	4	4	4	4	teşekkürler hocam herşey için	thank you sir for everything
3	3	3	3	3	3	3	3	3	3	3	3	3	3	3	3	güzel	Beautiful
3	3	3	3	3	3	3	3	3	3	3	3	3	3	3	3	teşekkürler	thanks
3	3	3	3	3	3	3	3	3	3	3	3	3	3	3	3	Hocamıza verimli bir dönem sunduğu için teşekkür ederim.	I would like to thank our teacher for providing a productive semester.
4	4	4	4	4	4	4	4	4	4	4	4	4	4	4	4	Çok iui	very nice
4	4	4	4	4	4	4	4	4	4	4	4	4	4	4	4	Dönem boyu öğrendiğim herşey için hocama teşekkür ederim. Bu dersten hem çok şey öğrendim, hem de dersler gayet keyifli bir atmosferde işlendi. Hocanın dersin konularına hakimiyeti ve bir o kadarda pozitif yaklaşımı ile, iyi ki bu dersi almışım dediğim bir dönem geçirdim. Saygılarımı sunarım...	I would like to thank my teacher for everything I learned throughout the semester. I learned a lot from this course, and the lessons were taught in a very enjoyable atmosphere. With the instructor's command of the course topics and his positive approach, I had a semester where I was glad I took this course. My respects...
3	3	3	3	2	4	3	4	4	3	3	3	3	3	3	3	KRY dersi daha ilgi çekici olabilirdi. Sadece oturup belirli konuları dinlemek biraz yavan kaldı gibi.	ERM course could have been more interesting. Just sitting and listening to certain topics seems a bit dry.
1	2	1	1	1	1	1	2	2	1	1	1	1	1	1	1	Ders zaten zor bir ders olmasının yanında bizim için daha da zorlaştırıldı. Her şeyi biliyormuşuz kabul edildi. Bilmediğimizi söylediğimizde ise olumlu bir dönüş alamadık.	Although the lesson was already a difficult one, it was made even more difficult for us. It was assumed that we knew everything. When we said we didn't know, we didn't get a positive response.
4	3	4	4	4	4	4	4	4	3	3	3	3	3	3	3	Hocam dersiniz zordu ve daha yüksek notlar beklerken hayal kırıklığına uğradım ve çalıştığımın karşılığını alamadığımı düşünüyorum.	Sir, your course was difficult and while I was expecting higher grades, I was disappointed and I think I did not get the reward of my hard work.
3	3	3	3	3	3	3	3	3	3	3	3	3	3	3	3	Güzeldi	it was nice
4	4	4	4	4	4	4	4	4	4	4	4	4	4	4	4	800 tl Lik kitap alıp almadığınıza göre -10 puanınızın gitmesi çok saçma	It's ridiculous that you get -10 points depending on whether you bought a book worth 800 TL or not.
4	4	4	4	4	4	4	4	4	4	4	4	4	4	4	4	Çok başarılı ve öğreti	Very successful and instructive
4	4	4	4	4	4	4	4	4	4	4	4	4	4	4	4	Kaynakça paylaşılabilir	References can be shared
3	3	3	3	3	3	3	3	3	3	3	3	3	3	3	3	İyi	Good
4	4	4	4	4	4	4	4	4	4	4	4	4	4	4	4	X	X
4	4	4	4	4	4	4	4	4	4	4	4	4	4	4	4	Hocaya tesekkur ediyorum	I thank the teacher
4	4	4	4	4	4	4	4	4	4	4	4	4	4	4	4	Hocamız iyiydi	Our teacher was good
4	4	4	4	4	4	4	4	4	4	4	4	4	4	4	4	Her şey olması gerektiği gibiydi.	Everything was as it should be.
3	3	3	3	3	3	3	3	3	3	3	3	3	3	3	3	iyi	Good
4	4	4	4	4	4	3	4	4	3	3	3	3	3	3	3	İlk derste anlatılan izlence planından ayrılmadığınızı sınav sorularıyla da derste anlatılanlardan konulardan da gördüm bu beni motive eden detaydı. Olabildiğince açık ve bağlantısallığı güçlü bir ders anlatımınız oldu dolayısıyla sınavlara özgüvenli hazırlanabildim. Araştırıp okumaya teşvik edici bir göç sosyolojisi dersiydi, teşekkür ederim.	I saw that you did not deviate from the syllabus plan explained in the first lesson, both with the exam questions and the topics covered in the lesson, and this was the detail that motivated me. Your lecture was as clear and connected as possible, so I was able to prepare for the exams with confidence. It was a migration sociology course that encouraged me to research and read, thank you.
3	3	3	3	2	3	2	3	3	2	2	2	2	2	2	2	hocamızın kendi yazmış olduğu kitabın dili çok ağır. içinde pek çok tedavülden kalkmış eski türkçe kelimeler var. bu durum derste işlenen konuları tekrar ederken anlamamızı oldukça zorlaştırdı	The language of the book written by our teacher himself is very heavy. It contains many obsolete old Turkish words. This made it very difficult for us to understand the topics covered in the course while repeating them.
4	4	4	4	4	4	4	4	4	4	4	4	4	4	4	4	Iyiydi	it was good
4	4	4	4	4	4	4	4	4	4	4	4	4	4	4	4	Güzel bir dersti	It was a good lesson
1	1	1	1	1	1	1	1	1	1	1	1	1	1	1	1	Eğitim öğretim hayatımda ilk kez karşılaştığım bir öğretmen tiplemesi kendi mutsuzluğunu öğrenciye ciddi derecede yansıtıp hayattan gram zevk almayan sevgisiz bir insandır kendisi bu derse başlarken zaten beni geçirmeyeceğinden emindim eminimki benim ismimide bir şekilde bulur ama hiç problem değil kendisinden en kısa zamanda kurtulmak dileğiyle..	The character of a teacher that I have encountered for the first time in my education life is a loveless person who seriously reflects his unhappiness on the student and does not enjoy life at all. When I started this course, I was sure that he would not pass me by. I am sure he will find my name somehow, but it is not a problem. I hope to get rid of him as soon as possible.
4	4	4	4	4	4	4	4	4	4	4	4	4	4	4	4	Çok akıcı bir ders ve öğretici	A very fluent lesson and tutorial
4	4	4	4	4	4	4	4	4	4	4	4	4	4	4	4	Hocamız çok saygılı ve özenli bir insan. Öğrencilerle bireysel olarak konuşurken bile hep "siz" olarak hitap etti. Derse her zaman kendine ve derse özenerek geldi. Öğrencilerle çok ilgiliydi. Derse katılım sağlanması için gereken özeni ve yardımı gösterdi. Sorulan sorulara mümkün olan en ince ayrıntılı şekli ile yanıt vererek öğrencilere yardımcı oldu.	Our teacher is a very respectful and attentive person. Even when speaking to students individually, he always addressed them as "you". He always came to class taking care of himself and the lesson. He was very interested in the students. He showed the necessary care and assistance to ensure participation in the class. He helped the students by answering the questions asked in the most detailed wa…
4	4	4	4	4	4	4	4	4	4	4	4	4	4	4	4	Dersin öğretim elemani ve ders hakkinda olumsuz dusuncem bulunmamaktadir . Verimli guzel bir donem gecirdik. Kariyerim adına çok onemli bir ders olduğundan çok verimli ve güzel bir ders dönemi oldu	I have no negative thoughts about the course instructor or the course. We had a good and productive period. It was a very productive and good course period as it was a very important course for my career.
4	4	4	4	4	4	4	4	4	4	4	4	4	4	4	4	Hocamızı çok seviyorum	I love our teacher very much
4	4	4	3	3	3	4	4	4	4	4	4	4	4	4	4	Hayvan doku kültürü dersi genel olarak olumlu ve anlaşılır geçti fakat bitki doku kültürü dersinde anlamakta zorluk çektim. Bazı bitki kültürü deneylerinde materyalleri ve yapılanları pek anlayamadım, anlamadığım yerleri de prosedürde bulamadım.	The animal tissue culture course was generally positive and understandable, but I had difficulty understanding the plant tissue culture course. In some plant culture experiments, I could not quite understand the materials and procedures, and I could not find parts of the procedure that I did not understand.
1	1	1	1	1	1	1	1	4	1	1	1	1	1	1	1	Öğrenciye maddi açıdan çok yük oluşturduğunu düşündüğüm bir ders oldu. Gerekli malzemeleri okulun karşılaması gerektiğini düşünüyorum	It was a course that I thought created a lot of financial burden on the student. I think the school should provide the necessary materials.
3	3	3	3	3	3	3	3	3	3	3	3	3	3	3	3	Güzel bir dönemdi	It was a good time
4	4	4	4	4	4	4	4	4	4	4	4	4	4	4	4	Yardımcı olmaya çalışan ve bir şeyler katmaya çalışan bir hoca, seviyoruz.	He is a teacher who tries to help and contribute something, we love him.
3	3	3	4	2	2	2	1	2	2	2	2	2	2	2	2	dersleri daha etkili ve verimli işleyebilmek için hocanın öğrencilerle olan etkileşimi artmalı	In order to teach lessons more effectively and efficiently, the teacher's interaction with the students should increase.
4	4	4	4	4	4	4	4	4	4	4	4	4	4	4	4	Sınav sorularımız biraz zordu ancak dersler gayet keyifli ve verimliydi. Hocamıza bize olan katkılarından dolayı teşekkür ediyorum.	Our exam questions were a little difficult, but the lessons were very enjoyable and productive. I would like to thank our teacher for his contributions to us.
4	3	4	3	2	4	3	4	4	4	4	4	4	4	4	4	İyi niyetli ve sağlam bir hocaydı , ders olumlu bir dersti.	He was a well-intentioned and solid teacher, the lesson was a positive one.
4	4	4	3	3	4	3	3	4	4	4	4	4	4	4	4	İyi	Good
4	4	4	4	4	4	4	4	4	4	4	4	4	4	4	4	Teşekkür ederim.	Thank you.
3	3	3	3	3	3	3	4	4	3	3	3	3	3	3	3	Katkılarınız için teşekkür ederim	Thank you for your contributions
3	3	3	3	3	3	3	3	3	3	3	3	3	3	3	3	Hoca çok iyiydi sağ olasın bize çok güzel deneyim sağladı	The teacher was very good, thank you, he gave us a great experience.
4	3	4	4	3	4	3	4	4	4	4	4	4	4	4	4	Hocamıza teşekkürler.	Thanks to our teacher.
4	3	2	2	2	1	2	2	2	1	1	1	1	1	1	1	Bu dersten sorumlu olan öğretim elemanı, derse ayrılan zamanı etkin kullanamamaktadır. Bu sebeple müfredattaki bazı konuların yetişmemesi ve bazı konuların yeterli düzeyde işlenmemiş olması gibi sorunlar yaşanmıştır. Sınavlarda sorulan soruların biz öğrencilere yeterli düzeyde öğretilememiş olması, harf notumuzun düşmesine sebep olmuştur.	The instructor responsible for this course cannot use the time allocated to the course effectively. For this reason, there were problems such as some subjects in the curriculum not being covered and some subjects not being covered sufficiently. The fact that we students were not taught the questions asked in the exams at a sufficient level caused our letter grades to decrease.
4	4	4	4	4	4	4	4	4	4	4	4	4	4	4	4	Dönemimiz çok güzel geçti. Tüm emekleriniz için teşekkürler	Our term went very well. Thanks for all your hard work
4	4	4	4	4	4	4	4	4	4	4	4	4	4	4	4	Hocamıza emeklerinden dolayı çok teşekkür ederim.	I would like to thank our teacher very much for his efforts.
4	4	4	4	4	4	4	4	4	4	4	4	4	4	4	4	Derslerin işleyişi güzeldi fakat bu dersi aldığımız sınıf şube kalabalıktı ve sınıf küçüktü onun dışında ciddi bir sorun ile karşılaşmadık, öğretim görevlisi dersi güzel ve anlaşılır şekilde anlattı.	The course of the lessons was good, but the class in which we took this course was crowded and the class was small, other than that, we did not encounter any serious problems, the instructor explained the lesson in a nice and understandable way.
3	3	3	3	3	3	3	3	3	3	3	3	3	3	3	3	İyi	Good
4	4	4	4	4	4	4	4	4	4	4	4	4	4	4	4	Dersin işlenişi veya içeriği hakkında bir sorunum yok. Hali hazırda nasıl bir ders işleneceğini biliyordum o yüzden var olan şekilde devam edilmesi en iyisidir.	I have no problem with the teaching or content of the course. I already knew how to teach a lesson, so it is best to continue as it is.
4	4	4	4	4	4	4	4	4	4	4	4	4	4	4	4	Dönem boyunca her hafta gelen konuklar kariyer planlamamda çok etkili oldu.	The guests who came every week throughout the semester were very effective in my career planning.
4	4	4	4	4	4	4	4	4	4	4	4	4	4	4	4	Vize sınavında sistem çökmesinden dolayı yaklaşık 20 dakikalık bir kaybım oldu sistemsel sıkıntı yaşadım.	I lost about 20 minutes during the midterm exam due to a system crash and experienced a system problem.
3	3	3	3	3	3	3	3	3	3	3	3	3	3	3	3	Güzel geçen bir ders oldu	It was a good lesson
4	4	4	4	4	4	4	4	4	4	4	4	4	4	4	4	ders gayet güzel ilerledi	The lesson went very well.
4	4	4	4	4	4	4	3	4	4	4	4	4	4	4	4	GÜZELL	BEAUTIFUL
4	4	4	4	4	4	4	4	4	4	4	4	4	4	4	4	Boş	Empty
4	4	4	4	4	4	4	4	4	4	4	4	4	4	4	4	Dersler çok güzel ve keyifli geçti.	The lessons were very nice and enjoyable.
4	4	4	4	4	4	4	4	4	4	4	4	4	4	4	4	Yok	None
3	3	3	3	3	3	3	3	3	3	3	3	3	3	3	3	genellikle iyi	generally good
3	3	3	3	3	3	3	3	3	3	3	3	3	3	3	3	ders keyifliydi	the lesson was enjoyable
3	3	3	3	3	3	3	3	3	3	3	3	3	3	3	3	dersler açıklayıcı ve bilgilendiriciydi	The lessons were clear and informative.
4	4	4	4	4	4	4	4	4	4	4	4	4	4	4	4	Ders benim için ilgi çekici ve mesleğime katkısı büyük oldu	The course was interesting for me and contributed greatly to my profession.
4	4	4	4	4	4	4	4	4	4	4	4	4	4	4	4	Ben başarılı buluyorum	I find it successful
3	3	3	3	3	3	3	3	3	3	3	3	3	3	3	3	Çok iyi çok başarılı	Very good very successful
4	4	4	4	4	4	4	4	4	4	4	4	4	4	4	4	Fakültenin en iyi kıymetli hocalarından birisi. Çok öğrenci dostu, akademik anlamda çok öğrenciye yardım ettiğine tanıklık ettim.	He is one of the best and most valuable professors of the faculty. He is very student-friendly, I have witnessed that he helps many students academically.
4	3	4	4	4	4	4	4	4	4	4	4	4	4	4	4	verimli ve bol bilgi alışverişi olan bir dersti	It was a productive and abundant information exchange course.
4	4	4	4	4	4	4	4	4	4	4	4	4	4	4	4	Teşekkür ederiz	thank you
4	4	4	4	4	4	4	4	4	4	4	4	4	4	4	4	olumlu	positive
4	4	4	4	4	4	4	4	4	4	4	4	4	4	4	4	Öğretmenimi çok seviyorum	I love my teacher very much
3	3	3	3	3	3	3	3	3	3	3	3	3	3	3	3	Her şey için çok teşekkür hocam emeğinize sağlık.	Thank you very much for everything, sir, thank you for your efforts.
4	4	4	4	4	4	4	4	4	4	4	4	4	4	4	4	Başarlı bir dönemdi	It was a successful period
3	3	3	3	3	3	3	3	3	3	3	3	3	3	3	3	Çok iyi	Very good
4	4	4	4	4	4	4	4	4	4	4	4	4	4	4	4	Iyıydi	it was good
4	4	4	4	4	4	4	4	3	3	3	3	3	3	3	3	Verimliydi	It was productive
2	2	2	2	2	2	2	2	2	2	2	2	2	2	2	2	Uzaktan eğitim diğer derslere göre daha kolaydı	Distance education was easier than other courses
4	4	4	4	4	4	4	4	4	4	4	4	4	4	4	4	Dersin bilgilendirici olduğunu düşünüyorum	I think the lesson was informative
4	4	4	4	4	4	4	4	4	4	4	4	4	4	4	4	Teşekkürler	Thanks
4	4	4	4	4	4	4	4	4	4	4	4	4	4	4	4	Öğretmenimden çok memnunum	I am very pleased with my teacher
3	3	3	3	3	3	3	3	3	3	3	3	3	3	3	3	İyi	Good
3	3	3	3	3	3	3	3	3	3	3	3	3	3	3	3	Ders içeriği çok güzel. Bazı slaytlar daha açıklayıcı olabilir	The course content is very good. Some slides could be more descriptive
4	4	4	4	4	4	4	4	4	4	4	4	4	4	4	4	Cok sevdigim insanlar tanidim ve cok sey ogrendim	I met people that I liked very much and I learned a lot.
4	4	4	4	4	4	4	4	4	4	4	4	4	4	4	4	Yararlı bir dersti	It was a useful lesson
4	4	4	4	4	4	4	4	4	4	4	4	4	4	4	4	Merhaba, üniversite ile ilgili bilgilendirmeler biraz daha detaylı olabilirdi. Mesela ben bu dönem başka bir üniversiteden geçtim ve birçok farklı şeyi sonradan okulda öğrendim. Örneğin servisler ile ilgili bilgileri, en basitinden vize, final sonuçları nerede açıklanır, işler nasıl yürür, dersten kaç ortalama olunca kalınıyor vs. Bunlara dair de 1 tane 20-30 dakikalık ders niteliğinde bir video …	Hello, information about the university could have been a little more detailed. For example, I transferred to another university this semester and learned many different things at school later. For example, information about services, simply visa, where final results are announced, how things work, how many courses are failed, etc. If another 20-30 minute lesson video is made about these, it may …
3	3	3	3	3	3	3	3	3	3	3	3	3	3	3	3	Guzel	Beautiful
4	4	4	4	4	4	4	4	4	4	4	4	4	4	4	4	Vize ödevinin final zamanı verilmesi,bu dersten girdiğimiz ilk sınavımızın finalimiz olması ve vize notumuzu bilmeden finale girmek zorunda bırakılmak zorlayıcı oldu.Özellikle daha öncesinde bolca zaman varken vize ödevinin final haftası ve finallerin en yoğun olduğu ilk hafta verilmesi biz öğrencileri oldukça zora sokmuştur.Umarım bizden sonra dersi alacak arkadaşlarım aynı mağduriyeti yaşamazla…	It was challenging to be given the midterm homework at the final time, the first exam we took from this course to be our final, and to be forced to take the final without knowing our midterm grade. Especially, giving the midterm homework during the final week and the first week when finals are the busiest, when there was plenty of time beforehand, put us students in a difficult situation. I hope …
4	4	4	4	4	4	4	4	4	4	4	4	4	4	4	4	Hocamıza emekleri için teşekkür ederim	I thank our teacher for his efforts.
3	4	4	4	3	4	3	4	4	4	4	4	4	4	4	4	Online olması sebebiyle dersi anlamakta zorluk seçtim	I found it difficult to understand the course because it was online.
3	3	3	3	3	3	3	3	3	3	3	3	3	3	3	3	Derste çok değerli tartışmalar yapıldı fakat teorik bir altyapı eksikliğini hissettim. Ilaveten, yapılan tartışmalar bir noktadan sonra birbirini tekrar eden, faydasız tartışmalara dönüştü çünkü öğrenciler bir şeyler okumadan geliyor, hoca da okumamız için dersle alakalı bir şeyler onermiyordu.	Very valuable discussions were held in the course, but I felt a lack of theoretical background. In addition, after a point, the discussions turned into repetitive, useless discussions because the students came without reading anything and the teacher did not suggest anything related to the course for us to read.
4	4	4	4	4	4	4	4	4	4	4	4	4	4	4	4	Hocamızın dersi çok keyifliydi. Ders içeriğini çok beğendim.	Our teacher's lesson was very enjoyable. I really liked the course content.
4	4	4	4	4	4	4	4	4	4	4	4	4	4	4	4	Teşekkür ederim. Çok faydalı ve yeterliydi.	Thank you. It was very useful and sufficient.
4	4	4	4	4	4	4	4	4	4	4	4	4	4	4	4	BAŞARILI BİR DÖNEM İÇİN TEŞEKKÜR EDERİZ.	THANK YOU FOR A SUCCESSFUL TERM.
3	3	2	2	2	2	2	3	3	3	3	3	3	3	3	3	Dersteki birkaç bilgiyi ayrıntılı öğrenemediğimi bireysel yollarla öğrendiğimi düşünüyorum ders zordu öğrenim daha ayrıntılı olabilirdi	I think that I could not learn some of the information in the course in detail and that I learned it through individual means. The course was difficult and the learning could have been more detailed.
2	3	3	4	2	4	3	2	4	2	2	2	2	2	2	2	Çok sorumsuzluk yaşandığını düşünüyorum. Dersler zamanında yapılmadı. Hep geç başlandı ve 1 saat sonra mesaj atılıp haber verildi. Maillere geri dönüş alamadım.	I think there is a lot of irresponsibility. Lessons were not held on time. It always started late and a message was sent 1 hour later to inform them. I did not receive a response to emails.
1	1	1	1	1	1	1	1	1	1	1	1	1	1	1	1	Ogretim elemani ile ilgili cok fazla sorun yasandi. Midterm da anlatmadigi konuda soru sordu ve o soru midterm'umuzdu. Derste gereksiz bilgiler vererek dersin amaci ve odagindan sasildigini dusunuyorum. Son sinif ogrencilerinin son doneminde yeni ogretim elemanin alinmasi ve kurulan duzenin yanlis oldugunu soylemesi, son zamanlar icin kafa karistirici oldu. Ornegin, translate machine lerden yarar…	There were a lot of problems with the instructor. Midterm also asked a question about something he didn't explain, and that question was our midterm. I think that the purpose and focus of the course was overlooked by giving unnecessary information in the course. It has been confusing lately when a new faculty member was hired in the last semester of senior students and he said that the establishe…
4	4	4	4	4	4	4	4	4	4	4	4	4	4	4	4	Bize kattıklarınız için çok teşekkür ederiz hocam	Thank you very much for joining us, sir.
1	1	1	1	2	1	2	1	2	1	1	1	1	1	1	1	Öğrenim elemanlarının öğrencileri eleştirmekten ve kullandıkları olumsuz üsluptan derhal vazgeçmeli,dersin öğrenciyi bırakmak adı altında değil öğrenmek adı altında ilerlemelidirler.	Lecturers should immediately stop criticizing students and the negative tone they use, and proceed with the lesson in the name of learning, not in the name of abandoning the student.
2	3	2	3	2	3	2	3	2	3	3	3	3	3	3	3	Sınav-süre durumuna daha dikkat edilebilir. Finalde 5 pratik, 25 test sorusu ve 50 dakika verilmişti. Ancak yetiştirmek mümkün değildi. Ayrıyeten dönem boyunca hiç pratik çözülmedi. Pratik çözülmesi cok daha faydalı olabilirdi.	More attention can be paid to the exam-duration situation. In the final, 5 practice questions, 25 test questions and 50 minutes were given. However, it was not possible to cultivate it. Additionally, no practice was resolved during the period. A practical solution would have been much more useful.
2	2	2	2	2	3	2	2	3	1	1	1	1	1	1	1	VERİMSİZ BİR DÖNEMDİ	IT WAS AN UNPRODUCTIVE PERIOD
1	1	1	1	1	1	1	1	1	1	1	1	1	1	1	1	Dünyanın en zor dersi ve ve en detaycı hocası çok zor bir dersi ekstra zorlaştıran bi klasik sınavı oldu..	The hardest course in the world and the most detailed teacher was a classical exam that made a very difficult course extra difficult.
2	4	2	3	3	2	3	3	2	3	3	3	3	3	3	3	Geçtiğimiz dönemde olduğu gibi bu dönemde de öğretim elemanlarının birbirleri arasındaki iletişimsizlik ve paralel ilerlememelerinden dolayı kimi öğrenciler kendi hataları olmadığı halde ister istemez sınıfın bir kısmından geri kalmak durumunda bırakılmışlardır. Şubelerdeki öğrenciler projelerinde birbirlerinden çok farklı aşamalarda ilerlemekte olup öğrencilerin bir kısmı geri kaldıklarını düşün…	As in the previous semester, some students were forced to fall behind some of the class through no fault of their own, due to the lack of communication between faculty members and their lack of parallel progress. Students in the branches were progressing at very different stages in their projects, and some of the students thought that they were falling behind and could not move forward in the pro…
4	4	4	4	4	4	4	4	4	4	4	4	4	4	4	4	Her dönem derslerine severek girdiğimiz bir hoca. Derse katılmamak mümkün değil, her bir ders seminer niteliğine değerli bilgilerle dolu. Kendisinin adını duymuş sayenizde geçen dönem tanışma fırsatımız olmuştu. Umarım bir sonraki dönemde farklı bir derste daha kendisiyle beraber olup, okulu bitirirken son dönemimizde değerli bilgilerinden bir kez daha faydalanma fırsatımız olur	He is a teacher whose classes we enjoy every semester. It is impossible not to attend the lecture, each lecture is full of valuable information, making it a seminar. We had the opportunity to meet him last term, thanks to you having heard of him. I hope that we will have the opportunity to take a different course with him next term and benefit from his valuable knowledge once again in our last se…
3	3	3	3	3	3	3	3	3	3	3	3	3	3	3	3	çok güzel bir dönemdi	It was a great time.
2	2	2	2	2	2	2	2	2	2	2	2	2	2	2	2	Ders içeriği çok yoğundu. 1 eğitim döneminde 3 farklı programlama dili öğretilmeye çalışıldığı için en nihayetinde hiçbir programla dili yeterince öğretilemedi. Bunun da gerçek anlamda bir faydası olduğunu düşünmüyorum. Bunun yerine tek bir programlama dili yeterince iyi öğretilseydi çok daha faydalı olurdu.	The course content was very intense. Since 3 different programming languages ​​were tried to be taught in one educational period, ultimately the language could not be taught sufficiently with any program. I don't think this has any real benefit either. It would be much more useful if a single programming language was taught well enough instead.
4	4	4	4	4	4	4	4	4	4	4	4	4	4	4	4	Ders işleyişi güzeldi hiç bir problem yaşamadım	The course was good and I had no problems.
2	2	2	2	1	2	2	2	3	3	3	3	3	3	3	3	Online olarak laboratuvar dersinin yapılması çok saçmaydı ve öğrenmemize hiç bir katkısı olmadı. Deneyleri yapamadık gözlemleyemedik ve mantığını anlayamadık	Having a laboratory course online was ridiculous and did not contribute to our learning at all. We couldn't do the experiments, we couldn't observe and we couldn't understand the logic.
3	4	3	3	4	4	3	3	3	4	4	4	4	4	4	4	İyi	Good
4	4	4	4	3	4	3	4	4	4	4	4	4	4	4	4	hocamıza emekleri için teşekkür ederiz.	We thank our teacher for his efforts.
4	4	3	3	4	2	3	3	4	4	4	4	4	4	4	4	Ders içeriği daha zengin olabilirdi. Dönem boyunca makale yazımı yerine buna ayrılan vaktin daha kısıtlı olup akademik referans yazımı gibi konular da ön planda olabilirdi.	Course content could have been richer. Instead of writing articles throughout the semester, the time allocated for this could have been more limited and issues such as academic reference writing could have been at the forefront.
4	4	4	4	4	4	4	4	4	4	4	4	4	4	4	4	Güzel bir dersti, İnigilzice konuşma yeteneğim gelişti bence	It was a good lesson, I think my English speaking skills improved.
2	2	2	3	3	1	1	3	3	2	2	2	2	2	2	2	En azından elimizde okuyacağımız bir kitap olmasını çok isterdim. Sadece ders notlarıyla bir yere kadar anlayabiliyoruz. Hocanın bir kitabı takip etmesini beklerdim.	I wish we at least had a book to read. We can only understand it to some extent with lecture notes. I expected the teacher to follow a book.
1	1	1	1	1	1	1	1	1	1	1	1	1	1	1	1	Keşke dönem ortası mağdur bırakılmasaydık	I wish we weren't left victimized in the middle of the semester.
4	4	4	4	4	4	4	4	4	4	4	4	4	4	4	4	iyi ki varsınız bize kattığınız tüm güzel şeyler için teşekkür ederim ??	I'm glad to have you, thank you for all the good things you bring to us.
4	4	4	4	4	4	4	4	4	4	4	4	4	4	4	4	Tez toplantılarına daha fazla vakit ayırılabilir.	More time can be devoted to thesis meetings.
4	4	4	4	4	4	4	4	4	4	4	4	4	4	4	4	hocayla ilgili değil ama idare dersi üst üste 3-4 saat olmamalı diye düşünüyorum gerçekten ağır geliyor	It's not about the teacher, but I think administration classes shouldn't be 3-4 hours in a row, it's really hard.
3	3	3	2	2	3	3	3	4	3	3	3	3	3	3	3	Derslerin deprem, YOK sureci, kisisel sebepler vs. durumlarindan yapilmayisini "ders yapamadik" bahanesiyle sinavlarimizla biz odedik, hos degil. Ayrica midterm oncesi turkce bolumune tum gerekli ders notlarinin yuklenmesine ragmen, ustelik hocamiza ulasmaya calismamiza da ragmen, midterm sonrasina kadar pdflere ulasma sansimiz olmadi. O noktada da bir anlami kalmamisti zaten.	The lessons were interrupted due to earthquake, DESTRUCTION process, personal reasons, etc. We paid for the situation with our exams under the excuse of "we couldn't study", it's not nice. Moreover, although all the necessary course notes were uploaded to the Turkish section before midterm, and even though we tried to reach our teacher, we did not have the chance to access the PDFs until after mi…
4	4	4	4	4	4	4	4	4	4	4	4	4	4	4	4	Benim için gayet verimli bir dönem oldu. Katkılarınız için teşekkürler hocam.	It was a very productive period for me. Thank you for your contribution, sir.
4	4	4	4	4	4	4	4	4	4	4	4	4	4	4	4	İyiydi	it was good
4	4	4	4	4	4	4	4	4	4	4	4	4	4	4	4	ON NUMARA BİR HOCA. DERSLERİ genellikle eğlenceli geçiyor zaten hocam dekan yardımcısıda olmuş müqq	HE IS A NUMBER TEN COACH. His classes are generally fun, my teacher is also the assistant dean.
4	4	4	4	4	4	4	4	4	4	4	4	4	4	4	4	Teşekkürler.	Thanks.
4	4	4	4	4	4	4	4	4	4	4	4	4	4	4	4	Maalesef bu dönem Antropoloji dersinden çok eksik kaldık. Dönem boyunca sadece 4 ders işlendi. Bu eksik nasıl kapatılacak?	Unfortunately, we missed a lot of Anthropology course this semester. Only 4 lessons were taught during the semester. How will this gap be closed?
3	3	3	3	3	3	3	3	3	3	3	3	3	3	3	3	Verimli	Productive
4	4	4	4	4	4	4	4	4	4	4	4	4	4	4	4	Hocamıza teşekkür ederim.	Thank you to our teacher.
3	3	3	3	3	3	3	3	3	3	3	3	3	3	3	3	hiçbir şey söylemek istemiyorum çünkü söyleyeceğim hiçbir şeyi kabul edeceğinizi düşünmüyorum umarım gelecekte daha anlayışlı ve iyimser bir hoca olursunuz öğrencileriniz sizinle konşmaya korkuyor	I don't want to say anything because I don't think you will accept anything I say. I hope you will be a more understanding and optimistic teacher in the future. Your students are afraid to talk to you.
1	2	2	2	2	2	1	1	2	2	2	2	2	2	2	2	HOCAMIZ ÇOK İYİ	OUR TEACHER IS VERY GOOD
4	4	4	4	4	4	4	4	4	4	4	4	4	4	4	4	Emekleriniz için teşekkür ediyorum hocam.	Thank you for your efforts, sir.
3	3	4	4	4	3	1	3	3	3	3	3	3	3	3	3	Bu dönem neredeyse hiç ders işlenmedi. Bu dersten neredeyse hiçbir şey öğrenmedim. Ders işleyemeyeceği zaman en azından ders kayıtları atılmalıydı.	Almost no classes were taught this semester. I learned almost nothing from this lesson. When the lesson could not be taught, at least the lesson records should have been discarded.
4	4	4	4	4	4	4	4	4	4	4	4	4	4	4	4	Ders süresi boyunca hocamızın bilgiyi aktarma başarısı öğrencilere gösterdiği ilgili tutumu çok değerliydi dönem boyunca bana her yönüyle çok şey katan bir dersti. Dersin öğretim görevlisinden önümüzdeki dönemlerde de ders almaya özen göstereceğim.	Our teacher's success in transferring knowledge and his caring attitude towards the students throughout the course was very valuable. It was a course that added a lot to me in every aspect throughout the semester. I will make a point to take lessons from the course instructor in the coming semesters.
1	1	1	1	1	1	1	1	1	1	1	1	1	1	1	1	puanlanıdrma çok düşüktü herkes 10-20 alıyorsa bence sorun birazda da hocadadır	The scoring was very low. If everyone gets 10-20, I think the problem is partly with the teacher.
4	4	4	4	4	4	4	4	4	4	4	4	4	4	4	4	Uzakta da olsak verimli bir dönem geçirdiğimizi düşünüyorum.Sınava tabi tutulmadan ödev yapma durumumuz benim çok hoşuma gitti ödevi yaparken çok keyif aldıım.	Even though we were far away, I think we had a productive semester. I really liked the fact that we were able to do homework without being tested. I enjoyed doing the homework very much.
4	4	4	4	4	4	4	4	4	4	4	4	4	4	4	4	Ders ileride iş bulmak için yapmamız gereken her şeyi gösteriyordu, hocamız da gayet güzel ders anlattı	The lesson showed us everything we needed to do to find a job in the future, and our teacher explained the lesson very well.
3	3	3	3	3	3	3	3	3	2	2	2	2	2	2	2	Pratik çalışmalarına ağırlık verilmesi gerektiğini düşünüyorum.	I think that emphasis should be placed on practical work.
2	2	2	2	2	2	2	2	2	2	2	2	2	2	2	2	Bu derste hoca bize yardımcı olmuyor	The teacher does not help us in this lesson
4	4	4	4	4	4	4	4	4	4	4	4	4	4	4	4	mln	mln
4	4	4	4	4	4	4	4	4	4	4	4	4	4	4	4	Saygıdeğer Hocam, katkılarınızdan, emeklerinizden dolayı sizlere çok teşekkür eder, 2024 yılının sağlık, mutluluk ve yeni görev yeriniz de başarılarla dolu bir akademik yıl geçirmenizi temenni ederim. Saygılarımla...	Dear Professor, I would like to thank you very much for your contributions and efforts, and I hope that 2024 will be an academic year full of health, happiness and success in your new position. Kind regards...
3	3	3	3	3	3	3	3	3	3	3	3	3	3	3	3	Yeterli olduğunu düşünüyorum	I think it's enough
3	3	3	3	3	3	3	3	3	3	3	3	3	3	3	3	Zor bir ders kaliteli hoca ?	Difficult lesson, quality teacher?
4	4	4	4	4	4	4	4	4	4	4	4	4	4	4	4	Teşekkürker	thank you
3	3	3	3	3	3	3	3	3	3	3	3	3	3	3	3	Final sınavına kadar bize harika bir eğitim verdi hocamız. Ancak finalde çok fazla olumsuz durum yaşanmıştır. İlk olarak final sınavında formül kağıdını vermiceğini önceden belirtmemiş olup ezberlenmesi gerekmeyen formülleri ezbere kullanmamızı finalde belirtti. Bununla beraber sınavda bazı öğrenciler neredeyse grup çalışması yapıcak kadar birlikte sohbet ederek yaptılar. Asistanın uyarılarına ra…	Our teacher gave us a great education until the final exam. However, there were many negative situations in the final. First of all, he did not state beforehand that he would not give the formula sheet in the final exam, and he told us to use the formulas by heart, which do not need to be memorized. However, some students chatted together during the exam, almost to the point of doing group work. …
1	1	4	3	2	1	2	1	3	3	3	3	3	3	3	3	Öğretim elemanı tarafından sıklıkla ders iptali, ders gününde değişiklik talebi vb. durumlar yaşandı. Bu nedenle tez sürecinde ihtiyaç duyulabilecek önemli konular ya yetişmedi ya da tam olarak aktarılamadı. Dersi anlatış biçimi, dersin Sosyal Bilimler alanındaki öğrenciler için zorluğunu da göz önünde bulundurduğumuzda açık ve anlaşılır değildi.	The instructor frequently requests course cancellations, course day change requests, etc. situations occurred. For this reason, important topics that may be needed during the thesis process were either not covered or could not be fully conveyed. The way he explained the course was not clear and understandable, considering the difficulty of the course for students in the Social Sciences field.
4	4	4	4	4	4	4	4	4	4	4	4	4	4	4	4	Öğretim elemanı son derece ilgiliydi, ders harici zamanlarda da kolaylıkla iletişim kurabildik. Öğrenciyi teşvik edici, yol gösterici bir yöntem uyguladı. Aklıma takılan tüm sorulara hızlıca yanıt aldım ve problemlerim her defasında çözüme kavuşturuldu. Öğretim elemanı sayesinde derse ilgim arttı, ayrıca kaynak paylaşımında bulundu ve her konuda yardımcı oldu.	The instructor was extremely attentive, and we were able to communicate easily outside of class. He applied an encouraging and guiding method to the student. I received quick answers to all my questions and my problems were resolved every time. Thanks to the instructor, my interest in the course increased, and he also shared resources and helped me in every aspect.
1	1	1	1	1	1	1	1	1	1	1	1	1	1	1	1	ders materyallerinin yetersiz olmasi buna rağmen sinavda sorumlu olmamiz tamamen haksizlik tum secmeli derslerin tek bir hocaya verilmis olmasi ve onun da bu sekilde ders anlatmasi ogrencilere zorluk yaratmakta hicbir verim alamiyoruz	It is completely unfair that the course materials are inadequate and yet we are responsible for the exam. The fact that all elective courses are given to a single teacher and that he teaches in this way creates difficulties for the students and we cannot get any results.
4	4	4	4	4	4	4	4	4	4	4	4	4	4	4	4	Ders amacına ulaştı	The lesson achieved its goal
4	4	4	4	4	4	4	4	4	4	4	4	4	4	4	4	Güzel	Beautiful
4	4	4	4	4	4	4	4	4	4	4	4	4	4	4	4	Herr şey çok etkili ve açıklayıcıydı. Hocamızın daha çok bölümümüzde ders vermesini umud ediyorum.	Everything was very effective and descriptive. I hope that our professor will teach more in our department.
4	4	4	4	4	4	4	4	4	4	4	4	4	4	4	4	Teşekkür ederim.	Thank you.
4	4	4	4	4	4	4	4	4	4	4	4	4	4	4	4	Başkent Üniversitesi'nin en değerli hocalarından birinden ders almanın onurunu taşıyorum. Tek kelime ile mükemmel bir akademisyen, konuya hakimiyeti, cevapları, derse teşvik etmesi, kullandığı yöntemler ve iletişimi çok üst düzeyde.	I have the honor of taking lessons from one of the most valuable professors of Başkent University. In a word, he is an excellent academician; his command of the subject, his answers, his encouragement, the methods he uses and his communication are at a very high level.
3	4	4	3	3	3	3	4	4	3	3	3	3	3	3	3	Hocamız vize sınavımızı daha önce okuyabilse ve öys'ye quiz ve vize notlarımızı dönem sonuna kalmadan daha önce yükleyebilse daha iyi olurdu	It would be better if our teacher could read our midterm exam earlier and upload our quiz and midterm notes to ÖYS before the end of the semester.
4	4	4	4	4	4	4	4	4	4	4	4	4	4	4	4	Bu dönem boyunca verdiğiniz emekler ve harcadığınız enerji için çok teşekkür ederim, sizden ve dersinizden çok şey öğrendim. Emeğinize sağlık.	Thank you very much for your efforts and energy during this semester, I learned a lot from you and your course. Thank you for your effort.
3	3	3	3	3	3	3	3	3	3	3	3	3	3	3	3	derse katılım sağlanıldı yararlıydı	Participation in the lecture was beneficial.
1	1	2	2	1	1	1	3	3	1	1	1	1	1	1	1	Hocamız öys sistemini hiç kullanmadı ,ders izlencesindeki konuları hiç takip etmedi, derste çözdüğü soruların çoğunda hatalar yaptı ve "siz sonra düzeltirsiniz" diyerek konuyla alakalı önemli soruları es geçti.	Our teacher never used the ÖYS system, did not follow the topics in the course syllabus, made mistakes in most of the questions he solved in the course, and skipped important questions related to the subject by saying "you can fix it later".
3	2	2	2	3	4	3	2	3	4	4	4	4	4	4	4	Online olduğu için sıkıcıydı	It was boring because it was online
4	4	4	4	4	4	4	4	4	4	4	4	4	4	4	4	Hocama emeklerinden dolayı teşekkür ederim, ders çok keyifli geçti. Fakat bütün online derslerde tek zorluk çektiğim olay yoklama takibiydi. Beklentim yoklama durumunun haftalık olarak verilmesiydi. Kendimiz takip etmemiz gerekirdi fakat 14 hafta olunca yer yer takip etmekte zorluk yaşadık.	I would like to thank my teacher for his efforts, the lesson was very enjoyable. However, the only difficulty I had in all online courses was attendance tracking. My expectation was that attendance status would be provided weekly. We should have followed it ourselves, but at 14 weeks we had difficulty following it at times.
2	2	2	2	2	2	2	2	2	2	2	2	2	2	2	2	Hoca sınavda kitabının aynı cümleleriyle yazmamızı bekliyor cevap doğru da olsa akıştan puan kırıyor	The teacher expects us to write the same sentences from the book in the exam, even if the answer is correct, he deducts points from the flow.
4	4	4	4	4	4	4	4	4	4	4	4	4	4	4	4	writing'de kendimi geliştirmeme çok yardımcı oldu. desteği sayesinde kapasitemi arttırdım.	It helped me a lot to improve myself in writing. Thanks to your support, I increased my capacity.
4	4	4	4	4	4	4	4	4	4	4	4	4	4	4	4	Verimli bir dersti teşekkürler	It was a productive lesson, thank you.
4	4	4	4	4	4	4	4	4	4	4	4	4	4	4	4	iyi	Good
3	4	4	4	4	2	2	4	4	4	4	4	4	4	4	4	Bu dersi alırken erken çocukluk dönemine uygun, bir öğretmen adayı olarak kullanabileceğim bilgiler öğreneceğim sanıyordum. Ancak erken çocukluk dönemini geçtim okul çağındaki çocukların beslenme bilgilerini bile öğrenemediğimi gördüm. Hocamızın anlatmış olduğu bütün konuların bizlerin bölümleriyle ne gibi bir ilgisi olduğunu anlayamadım. İşlemiş olduğumuz bütün slaytlarımızın fazla detaylı olmas…	While taking this course, I thought I would learn information appropriate to early childhood that I could use as a teacher candidate. However, once I passed the early childhood period, I saw that I could not even learn the nutritional information of school-age children. I couldn't understand how all the topics our teacher explained had to do with our departments. I think that the fact that all ou…
4	4	4	4	4	4	4	4	4	4	4	4	4	4	4	4	Derste seçimleri yapmadan önce içeriğini okuduğumda ne yazıyorsa hepsini görmüş ve öğrenmiş oldum. Öğretim elemanı değerli hocam bizlere çok değerli bilgiler öğretti ve tüm ders notları bizler için çok yardımcı oldu. Her şey için çok teşekkürler.	When I read the content before making the choices in the course, I saw and learned everything it said. My dear instructor taught us very valuable information and all lecture notes were very helpful to us. Thanks so much for everything.
4	4	4	4	4	4	4	4	4	4	4	4	4	4	4	4	Verilen ödevler derse daha iyi adapte olmamızı,daha kolay öğrenmemizi ve keyif almamızı sağladı	The homework given helped us adapt to the lesson better, learn more easily and enjoy it.
4	4	4	4	4	4	4	4	4	4	4	4	4	4	4	4	S	S.
4	4	4	4	4	4	4	4	4	4	4	4	4	4	4	4	harikaydı	it was great
2	2	2	2	2	2	2	2	2	2	2	2	2	2	2	2	İçerik çok yoğundu	The content was too intense
4	4	4	4	4	4	4	4	4	4	4	4	4	4	4	4	güzeldi bir sıkıntı yaşanmadı çok cana yakın bir hocaydı	It was nice, there was no problem, he was a very friendly teacher.
4	4	4	4	4	4	4	4	4	4	4	4	4	4	4	4	Tüm süreç içerisindeki desteklerinizden dolayı Teşekkür ediyorum	Thank you for your support throughout the entire process.
4	4	4	4	4	4	4	4	4	4	4	4	4	4	4	4	Hem danışmanım olarak, hem de hocam olarak bu dönemi bana iyi geçirttiğiniz için teşekkür ederim.	Thank you for making this semester a good one for me, both as my advisor and as my teacher.
4	4	4	4	4	4	4	4	4	4	4	4	4	4	4	4	Bu dersten faydalandığımı düşünüyorum	I think I benefited from this lesson
4	4	4	4	4	4	4	4	4	4	4	4	4	4	4	4	ÇOK TEŞEKKÜR EDERİM. ÖĞRETİM GÖREVLİSİNİN EMEĞİNE SAĞLIK.	THANK YOU VERY MUCH. THANK YOU TO THE EFFORTS OF THE LECTURER.
4	4	4	4	4	4	4	4	4	4	4	4	4	4	4	4	Katkılı bir ders teşekkürler ...	Thanks for a helpful lesson...
3	4	3	3	3	3	3	3	3	3	3	3	3	3	3	3	İyi güzel	good nice
4	4	4	4	4	4	4	4	4	4	4	4	4	4	4	4	Öğrencilerle paylaşılan çalışma kaynaklarının (sorular, çıkmış sınavlar) sayısının arttırılması sınavlara hazırlık ve konunun oturması açısından büyük kolaylık sağlayacağı düşüncesindeyim.	I believe that increasing the number of study resources (questions, exams) shared with students will greatly facilitate exam preparation and understanding of the subject.
1	1	1	1	1	1	1	1	1	1	1	1	1	1	1	1	ödevlerin cevap anahtarları yayınlanırsa en azından daha iyi öğrenebiliriz	If the answer keys of the assignments are published, we can at least learn better.
4	4	4	4	4	4	4	4	4	4	4	4	4	4	4	4	hocam gayet iyi anlattı derslerimizde güzel geçti	My teacher explained it very well and our lessons went well.
4	4	4	4	4	4	4	4	4	4	4	4	4	4	4	4	Z	Z.
4	4	4	4	4	4	4	4	4	4	4	4	4	4	4	4	Ders oldukca verimli ve anlaşılırdı.	The lesson was very productive and understandable.
4	4	4	4	4	4	4	4	4	4	4	4	4	4	4	4	GÜZELDİ	IT WAS BEAUTIFUL
4	4	4	4	4	4	4	4	4	4	4	4	4	4	4	4	Öğretim elemanlarının gerek ders esnasında gerekse ders sonrasında öğrencilerle olan iletişimi ve sorun çözmeye olan istekleri gerçekten fevkalade. Öğrenmemize yönelik şekilde çalışmaları yanlışımızı tane tane anlatarak doğruyu öğretmeye çalışmaları gerçekten harika. Başarılarının devamını dilerim.	The instructors' communication with students both during and after the lesson and their desire to solve problems are truly outstanding. It is really great that they work towards our learning and try to teach us the truth by explaining our mistakes in detail. I wish them continued success.
3	3	3	3	3	3	3	3	3	3	3	3	3	3	3	3	Yok	None
4	4	4	4	4	4	4	4	4	4	4	4	4	4	4	4	Hocamızla birlikte alacağımız son dersimiz olduğunu öğrendik bu dönem. Bu zamana kadar ki; anlayışınız, yardımseverliğiniz ve tabi ki emekleriniz için teşekkürler hocam.	We learned that this semester was our last lesson with our teacher. So far; Thank you, sir, for your understanding, helpfulness and of course your efforts.
4	3	4	4	3	3	4	3	4	4	4	4	4	4	4	4	DERSİN İÇERİĞİ ÇOK İYİ ÖĞRETİM ELEMANI DERSİ ÇOK İYİ ANLATTI MATERYAL YETERLİYDİ ,OLUMLU.	THE CONTENT OF THE COURSE IS VERY GOOD, THE LECTURER EXPLAINED THE COURSE VERY WELL, THE MATERIAL WAS SUFFICIENT, POSITIVE.
3	3	3	3	3	3	3	3	3	3	3	3	3	3	3	3	gayet iyi	pretty good
4	4	4	4	4	4	4	4	4	4	4	4	4	4	4	4	Zor bir ders	It's a hard lesson
3	3	3	3	3	3	3	3	3	3	3	3	3	3	3	3	İyi	Good
4	4	4	4	4	4	4	4	4	4	4	4	4	4	4	4	Çok gerekli bir ders değil.	It's not a very necessary course.
4	4	4	4	4	4	4	4	4	4	4	4	4	4	4	4	Her şey için teşekkürler :)	Thanks for everything :)
3	3	3	3	3	3	3	3	3	3	3	3	3	3	3	3	Ders maalesef çok zor	Unfortunately the course is very difficult.
4	4	4	4	4	4	4	4	4	4	4	4	4	4	4	4	TEŞEKKÜRLER	THANKS
3	3	3	3	3	3	3	3	3	3	3	3	3	3	3	3	S..	S..
4	4	4	4	4	4	4	4	4	4	4	4	4	4	4	4	Çok tatlı bir insan gerçekten öğrencilerine değer verip dersi anlatan birisi matematiği bana sevdiren birisi	He is a very sweet person, he really cares about his students and explains the lesson, he is someone who made me love mathematics.
4	4	4	4	4	4	4	4	4	4	4	4	4	4	4	4	Ders anlaşılırdı.	The lesson was understandable.
4	4	4	4	4	4	4	4	4	4	4	4	4	4	4	4	Ders akademik programı süresince doktora programına yönelik bizi literatür araştırmasına yönelten, düşünmeye, analiz etmeye ve strateji geliştirmeye yönlendiren, ders içeriğine bağlamında tarihsel olgularla pekiştirmemizi sağlayan değerli hocamıza teşekkür ediyorum. Saygılarımla	I would like to thank our valuable professor, who directed us to literature research for the doctoral program throughout the academic program of the course, directed us to think, analyze and develop strategies, and enabled us to reinforce the course content with historical facts in the context of the course. Kind regards
2	1	3	1	1	1	2	4	4	3	3	3	3	3	3	3	Bu gibi dersler gerçekten bizlerin öğrenmesine engel oluyor. Bilgisayar dersini ilk senemizde almıştık hatta bir de BTU dersi almıştık. Bunlar yetmezmiş gibi tam kurtulduk derken bir de 2. sınıfta bu ders çıktı. Bizler öğretmen adayıyız. 1. sınıfta öğretilen bilgisayar bilgileri yeterliydi. Bizlere alanımızla ilgili dersler verilmesi gerekirken zorlanarak yapmaya çalıştığımız bu ders gibi hiçbir …	Lessons like these really prevent us from learning. We took the computer course in our first year and even took a BTU course. As if these were not enough, just when we thought we were saved, this lesson came to light in the 2nd grade. We are teacher candidates. The computer knowledge taught in the first grade was sufficient. While we should be given courses related to our field, we are given cour…
4	4	3	3	2	3	4	2	4	4	4	4	4	4	4	4	Emeğiniz için teşekür ederim ?	Thank you for your effort.
4	4	4	4	4	4	4	4	4	4	4	4	4	4	4	4	Her şey çok güzel	Everything is beautiful
4	3	4	4	3	1	3	3	4	3	3	3	3	3	3	3	Puanı kıt veriyo	Gives scarce points
3	3	3	3	3	3	3	3	3	3	3	3	3	3	3	3	İİİİİİİ	IIIIIIIII
4	4	4	4	4	4	4	4	4	4	4	4	4	4	4	4	güzeldi	it was nice
4	4	4	4	4	4	4	4	4	4	4	4	4	4	4	4	dersten çok faydalandım	I benefited a lot from the course
4	4	4	4	4	4	4	4	4	4	4	4	4	4	4	4	etikili bir ders	an ethical lesson
3	3	3	3	3	3	3	3	3	3	3	3	3	3	3	3	teşekkürler	thanks
4	4	4	4	4	4	4	4	4	4	4	4	4	4	4	4	Hocama teşekkürlerimi sunarım.	I would like to thank my teacher.
4	4	4	4	4	4	4	4	4	4	4	4	4	4	4	4	ZOR AMA HOCAMIZ İLE BİRLİKTE ÇOK KEYİFLİYDİ	IT WAS DIFFICULT BUT IT WAS VERY ENJOYABLE WITH OUR TEACHER
4	4	4	4	4	4	4	4	4	4	4	4	4	4	4	4	Derslerimiz verimli geçiyor o yüzden ekliycek bir düşüncem yok	Our lessons are productive, so I don't have anything to add.
2	2	2	2	2	2	2	2	2	2	2	2	2	2	2	2	Tesekkur ederiz	Thank you
4	4	4	4	4	4	4	4	4	4	4	4	4	4	4	4	X	X
4	4	4	4	4	4	4	4	4	4	4	4	4	4	4	4	j	j
3	3	3	3	3	3	3	3	3	3	3	3	3	3	3	3	İyi	Good
4	4	4	4	4	4	4	4	4	4	4	4	4	4	4	4	Güzel	Beautiful
3	3	3	3	3	3	3	3	3	3	3	3	3	3	3	3	İçerik ve hocamız iyi	The content and our teacher are good
4	4	4	4	4	4	4	4	4	4	4	4	4	4	4	4	Çok eğlenceli ve keyifli bir ders oldu. Dersin eğlenceli ve keyifli geçmesinin en büyük sebebi dersi aldığım hocamdır. Çok tatlı, keyifli, bilgili bir insan olduğu için bu dersten oldukça zevk aldım.	It was a very fun and enjoyable lesson. The biggest reason why the course was fun and enjoyable is my teacher. I really enjoyed this course because he is a very sweet, pleasant and knowledgeable person.
4	4	4	4	4	4	4	4	4	4	4	4	4	4	4	4	Başkent Üniversitesinde aldığım en iyi hazırlanmış ve dolu içeriğe sahip dersti. Bu ders için herhangi iyileştirici geri dönüş yapabileceğimi sanmıyorum.	It was the most well-prepared and content-filled course I took at Başkent University. I don't think I can give any remedial feedback for this course.
3	3	3	3	3	3	3	3	3	3	3	3	3	3	3	3	Dersler güzeldi	The lessons were nice
4	4	4	4	4	4	4	4	4	4	4	4	4	4	4	4	Deney föyleri hiç açıklayıcı değil. Daha açıklayıcı ve ayrıntılı deney föyleri hazırlanmalı.Sınıfta(labta) arkadaşlar kendi aralarında yüksek sesle konuşup sohbet ediyorlar. Bu yüzden yaptığımız deneye odaklanamıyoruz ve hocamız sınıftaki bu kargaşayı durdurmak için hiçbir şey yapmıyor.	The test sheets are not descriptive at all. More descriptive and detailed experiment sheets should be prepared. In the classroom (lab), friends talk loudly and chat among themselves. That's why we can't focus on our experiment and our teacher does nothing to stop this chaos in the classroom.
4	4	4	4	4	4	4	4	4	4	4	4	4	4	4	4	Ders benim için çok anlaşılır ilerliyor hocalarımın aktarmak istediklerini anladığımı düşünüyorum yapılan çalışmalar da çok keyifli oluyor	The course is very understandable for me, I think I understand what my teachers want to convey, and the work is very enjoyable.
4	4	4	4	4	4	4	4	4	4	4	4	4	4	4	4	Çok güzel bir dönem ve ders işledik teşekkür ederiz	We had a great semester and lessons, thank you.
4	4	4	4	4	4	4	4	4	4	4	4	4	4	4	4	Hoca her hafta derslere hep hazır bir şekilde gelirdi. Etkinlikleri iyi bir şekilde anlatırdı. Dersler verimli geçerdi.	The teacher always came to the lessons prepared every week. He could explain the events well. The lessons were productive.
3	3	3	3	3	3	3	3	3	3	3	3	3	3	3	3	İyi	Good
4	4	4	4	4	4	4	4	4	4	4	4	4	4	4	4	Çok güzeldi	it was so beautiful
3	3	3	3	3	3	3	3	3	3	3	3	3	3	3	3	Verimli bir ders olduğu düşünmüyorum	I don't think it's a productive lesson.
4	4	4	4	4	4	4	4	4	4	4	4	4	4	4	4	Staj arkadaşlarımla birlikte Yenikent hastanesinde staj yaparken çok zorlandık. Bu konuda yardımcı olmanızı istiyoruz. 2. Dönem oraya gitmek istemiyoruz. Neresi olursa kabulumüzdür.	My intern friends and I had a hard time doing our internship at Yenikent Hospital. We want you to help with this. We don't want to go there in the 2nd term. Whatever it is, we accept it.
2	3	3	3	2	2	2	3	3	1	1	1	1	1	1	1	dersin saatinin geç saatte bitmesi özellikle eve dönme noktasında öğrencileri çok zorladı diye düşünüyorum. ayrıca bu durum öğrencilerin derse odaklanmasını da oldukça zorlaştırdı. final sınavında vize sonrası işlenen konuların daha büyük kısmı oluşturmasına rağmen pek çoğunun sorulmaması da tuhaftı	I think that the late end of the lesson made it very difficult for the students, especially when it came to returning home. Additionally, this situation made it very difficult for students to focus on the lesson. It was also strange that although the topics covered after the midterm exam constituted a larger part of the final exam, many of them were not asked.
4	4	4	4	4	3	3	4	4	4	4	4	4	4	4	4	Dersi genel olarak anlamakta zorlandım.	I had difficulty understanding the lesson in general.
4	4	4	3	3	4	4	4	4	3	3	3	3	3	3	3	Dersin içeriği ve öğretmenimizin uyumu oldukça başarılıydı. Derslere keyifle ve istekle gittim.	The harmony between the course content and our teacher was quite successful. I went to classes with pleasure and enthusiasm.
4	4	4	4	4	4	4	4	4	4	4	4	4	4	4	4	Hocam bizimle biraz daha not paylaşımında bulunmanızı çok isterdik. Emekleriniz için teşekkürler.	Sir, we would love for you to share some more notes with us. Thanks for your efforts.
4	4	4	3	3	3	3	3	3	3	3	3	3	3	3	3	Dersin hayattan örneklerle desteklenmesi gerektiğini düşünüyorum. Çok teorik anlatılan dersler kavramayı tam sağlayamıyor.	I think the lesson should be supported with examples from life. Lessons taught in a very theoretical manner do not provide full comprehension.
4	4	4	4	4	4	4	4	4	4	4	4	4	4	4	4	dersin işlenişinden çok keyif aldım. ders kazanımlarına hakim olduğumu söyleyebilirim. öğretim elemanının ders işleyiş şeklinden memnunum.	I really enjoyed how the course was taught. I can say that I have mastered the course outcomes. I am satisfied with the way the instructor teaches the course.
4	3	3	4	3	4	3	4	4	3	3	3	3	3	3	3	Deneyimleme imkanımız olsa daha güzel olurdu	It would be nice if we had the opportunity to experience it.
4	4	4	4	4	4	4	4	4	4	4	4	4	4	4	4	Sınavları zor olsa da ders anlatımı müthiş bir hoca...	Even though the exams are difficult, he is a great teacher with great lectures...
4	4	4	4	4	4	4	3	3	4	4	4	4	4	4	4	çok keyifli ve öğretici geçen bir ders	A very enjoyable and instructive lesson.
4	4	4	4	4	4	4	4	4	4	4	4	4	4	4	4	Dersleriöiz çok güzel geçti emekleriniz için teşekkür ederim.	Our lessons went very well, thank you for your efforts.
4	4	4	4	4	4	4	4	4	4	4	4	4	4	4	4	Hocamız dersi gerçekten çok güzel anlattı, bizi her zaman hem psikolojik, hem de fiziksel açıdan destekledi demek mümkün. Minnettarım...	It is possible to say that our teacher explained the lesson really well and always supported us both psychologically and physically. I am grateful...
4	4	4	4	4	4	4	4	4	4	4	4	4	4	4	4	çok iyidi	it was very good
1	1	1	1	1	1	1	1	1	1	1	1	1	1	1	1	BU DERS BU FAKÜLTEDE ÖĞRENMESİ EN KOLAY AMA SINAVI EN SAÇMA ZORLUKTA OLAN DERS BÜTÜN DÖNEMİ GEÇİP BUNDAN KALINMASINI SAĞLICAK ZORLUKTA Bİ DERS .	THIS IS THE EASIEST COURSE IN THIS FACULTY TO LEARN BUT THE EXAM IS THE COURSE WITH THE MOST DIFFICULT DIFFICULTY THAT WILL ENABLE YOU TO PASS THE WHOLE TERM AND FAIL IT.
1	1	1	1	1	1	1	1	1	1	1	1	1	1	1	1	Öğretmenimizin ingilizcesini anlamakta çok zorlandık. Derslerimiz çok kez iptal edildi ve iptal edilen derslerin telafisi olmadı. Derslerde sadece slaylardan okundu.	We had a hard time understanding our teacher's English. Our classes were canceled many times and there was no compensation for the canceled classes. In lectures, only slides were read.
4	4	4	4	4	4	4	4	4	4	4	4	4	4	4	4	Öğretmenimizin dersleri çok güzel geçti ve dersleri anlatış olarak en iyi yöntemleri kullandı. Dersi zor olmasına rağmen çok kolaylaştırdı derslerin her saati çok verimliydi.	Our teacher's lessons went very well and he used the best methods in teaching the lessons. Even though the lesson was difficult, he made it very easy and every hour of the lesson was very productive.
4	4	4	4	4	4	4	4	4	4	4	4	4	4	4	4	Çok iyi	Very good
2	1	3	3	3	4	2	3	4	2	2	2	2	2	2	2	Ders sözel bir ders ve slaytlarda gereksiz uzun anlatılmış bu yüzden anlaşılması ve ezberlenmesi çok zordu. Bütün dönem boyunca ne işlendiğini anlamadım. Sadece slaytlardan çalışıp sınava girdim. Notlar hakkında bilgilendirmeler çok geç yapıldığı için seviyemi anlayamadım.	The lesson was a verbal lesson and was explained unnecessarily long in the slides, so it was very difficult to understand and memorize. I didn't understand what was covered during the whole semester. I just studied from the slides and took the exam. Since the information about the grades was made very late, I could not understand my level.
4	4	4	4	4	4	4	4	4	4	4	4	4	4	4	4	Hocamızı eleştirmek için onun kadar bilgili olmamız gerekiyor ?	Do we need to be as knowledgeable as our teacher to criticize him?
4	4	4	4	2	4	4	4	4	4	4	4	4	4	4	4	Kullanılan toefl sistemi dersi güçleştirdi. Sistem sürekli cevapları kaydetmiyor ve basılı kitap ile sorular secenekler sistemde farklı. Ayrıca belirli miktar para ödediğimiz bu sistemde yalnızca bu dönem erişime açık olması işlevsiz.	The TOEFL system used made the course difficult. The system does not always record the answers and the question options are different in the printed book and the system. In addition, it is dysfunctional for this system, for which we pay a certain amount of money, to be accessible only during this period.
4	4	4	4	4	4	4	4	4	4	4	4	4	4	4	4	Derste çok az soru çözüldü sınavda farklı soru tiplerinde soru çıkarken özellikle hayal gücümüzü kullacağımız sorular varken sınıfta o şekilde hiç soru çözmedik umarım gelecek dönemlerde daha çok soru çözülür	Very few questions were solved in the course. While there were questions of different question types in the exam, we did not solve any questions in that way in the class, especially when we had to use our imagination. I hope more questions will be solved in the future periods.
2	2	2	2	2	2	2	3	3	3	3	3	3	3	3	3	Verimli değildi	It wasn't productive
4	4	4	4	4	4	4	4	4	4	4	4	4	4	4	4	Çok memnunduk, teşekkürler	We were very pleased, thank you
4	4	4	4	4	4	4	4	4	4	4	4	4	4	4	4	Ders benim için iyi geçti.	The lesson went well for me.
4	4	4	4	4	4	4	4	4	4	4	4	4	4	4	4	mükemmel bir ders ve hocaydı teşekkür ediyorum tekrar.	It was an excellent lesson and teacher, thank you again.
2	4	3	3	2	3	1	3	3	3	3	3	3	3	3	3	Hocalar derse sık sık gelmiyor bu durumdan bütün sınıf olarak şikayetçiyiz	Teachers do not come to class frequently and we, as a whole class, complain about this situation.
4	4	4	4	4	4	4	4	4	4	4	4	4	4	4	4	Memnunum yaşına göre iyi ilgileniyor ve geri bildirimi önem veriyor	I am satisfied. He takes good care of me considering his age and he attaches importance to feedback.
4	3	4	4	3	4	3	4	4	4	4	4	4	4	4	4	Bu ders kapsamındaki hazırlanan portfolyoların öğretimime bir katkı sağladığını hissedemedim. Ölçme değerlendirme için kullanılan sorular çok üst düzeydi. ayrıca verilen ödevin değerlendirme rubriğinin ödev tesliminden çok sonra paylaşılması ödevimi yaparken beni olumsuz etkiledi.	I did not feel that the portfolios prepared within the scope of this course contributed to my teaching. The questions used for assessment and evaluation were at a very high level. Additionally, the evaluation rubric of the assignment was shared long after the assignment was delivered, which had a negative impact on me while doing my homework.
4	4	4	4	4	4	4	4	4	4	4	4	4	4	4	4	bu dersi yüz yüze almak isterdim kendi açımdan uzaktan eğitimde aldığım dersler hiç verimli olmadı ama hocamıza teşekkür ediyorum	I would like to take this course face to face. For me, the courses I took in distance education were not productive at all, but I would like to thank our teacher.
4	4	4	4	3	3	4	4	4	4	4	4	4	4	4	4	hocanın ders notu vermemesi ve bizim not tutmamızı istemesi çok güzel, dersi dinlemeye çok teşvik ediyor ve dersi çok anlaşılır anlatıyor. sadece bazen birazcık daha yavaş anlatırsa not tutmak bizim açımızdan daha kolay olabilir çünkü bazen hoca hızlı konuştuğu/anlattığı için kaçırdığımız yerler oluyor.	It is very nice that the teacher does not give lecture notes and wants us to take notes. He encourages us to listen to the lecture and explains the lecture very clearly. Sometimes, it may be easier for us to take notes if the teacher explains a little slower, because sometimes we miss parts because the teacher speaks/explains quickly.
4	4	4	4	4	4	4	4	4	4	4	4	4	4	4	4	memnunum türk mutfağını çok güzel işledik ileride turlarımda kullanmak için de birçok birikim oldu	I am satisfied, we handled Turkish cuisine very well, and I have accumulated a lot of knowledge to use in my future tours.
4	4	4	4	4	4	4	4	4	4	4	4	4	4	4	4	Mükemmel	Perfect
3	3	3	2	2	2	3	3	3	2	2	2	2	2	2	2	Harika	Great
4	4	4	4	4	4	2	3	4	4	4	4	4	4	4	4	derste daha çok ingilizce konuşmayı istiyorum	I want to speak more English in class
4	4	4	4	4	4	4	4	4	4	4	4	4	4	4	4	Bu dersin bana katkısının çok büyük olduğunu düşünüyorum. Tüm hayatım boyunca kullanabileceğim bilgiler edindim. Teşekkür ederim ?	I think this course made a great contribution to me. I gained knowledge that I can use for the rest of my life. Thank you ?
4	4	4	4	4	4	4	4	4	4	4	4	4	4	4	4	Çok iyiler.	They are very good.
4	4	4	4	4	4	3	4	4	4	4	4	4	4	4	4	güzeldi ama matematik zor	It was nice but math was hard
1	1	1	1	1	1	1	1	2	1	1	1	1	1	1	1	Sayin hocamiz dersin kac kredi oldugunu bile bilmiyordu, odev istedigimizde farkinda vardi malesef...	Our esteemed teacher didn't even know how many credits the course had, unfortunately he was aware when we asked for homework...
4	4	4	4	4	4	3	4	4	3	3	3	3	3	3	3	her şey için teşekkürler :)	Thanks for everything :)
4	4	4	4	4	4	4	4	4	4	4	4	4	4	4	4	bu dönem her şey yeterli	This time everything is enough
4	4	4	4	4	4	4	4	4	4	4	4	4	4	4	4	gayet verimliydi hocamızda iyiydi	It was very efficient and our teacher was good.
3	2	3	2	3	3	2	1	1	2	2	2	2	2	2	2	Geriye dönüp dönem içindeki ilerlememize baktığımda bu ilerlemenin yetersiz olduğunu düşünüyorum. Dersimizin konusu olan Moho programnı da yeterince kapsamlı öğrendiğimizi düşünmüyorum. Hocamızın da ödev verirken, sınav konusu belirlerken ve not verirken dersin hedeflediği şeyden sapan yönlere takıldığını düşünüyorum.	When I look back at our progress during the period, I think this progress was insufficient. I don't think we learned the Moho program, which is the subject of our course, comprehensively enough. I think that our teacher also gets caught up in aspects that deviate from the objective of the course when assigning homework, determining the exam topic and grading.
4	4	4	4	4	4	4	4	4	4	4	4	4	4	4	4	Hocamın yöneticilik deneyimleri ve dersin niteliği alanıma katkıda bulunduğunu düşünüyorum.Dersler çok verimliydi	I think my teacher's management experiences and the quality of the course contributed to my field. The courses were very productive.
4	4	4	4	4	4	4	4	4	4	4	4	4	4	4	4	Dlls	dlls
4	4	4	4	4	4	4	4	4	4	4	4	4	4	4	4	Kolay bir ders.	It's an easy lesson.
3	3	3	3	3	3	3	3	3	3	3	3	3	3	3	3	İyi	Good
4	3	3	3	3	4	2	2	2	3	3	3	3	3	3	3	Memnunum	I'm satisfied
4	4	4	4	4	4	4	4	4	4	4	4	4	4	4	4	Hocam çok iyi biri kendileri elinden gelenin en iyisini yaptı sonuna kadar	My teacher is a very good person, they did their best until the end.
3	3	3	3	3	3	3	3	3	3	3	3	3	3	3	3	Çok iyi	Very good
4	4	4	4	4	4	4	4	4	4	4	4	4	4	4	4	ggbbb	ddbbb
4	4	4	4	4	4	4	4	4	4	4	4	4	4	4	4	Öğretim elemanı özverili başarılı hevesli çok begendim	I liked the instructor very much, dedicated, successful, enthusiastic
4	4	4	3	4	4	4	4	4	4	4	4	4	4	4	4	Hocamız konuyu güzel ve akıcı bir şekilde anlattı ama dersimizde kullandığı slaytların biraz daha ayrıntılı olmasını isterdim.	Our teacher explained the subject beautifully and fluently, but I wish the slides he used in our lesson were a little more detailed.
4	4	4	4	4	4	4	4	4	4	4	4	4	4	4	4	z	z
4	4	4	4	4	4	4	4	4	3	3	3	3	3	3	3	Herkese yönelik olması ve yüzyüze olması	It's for everyone and it's face to face.
3	3	3	3	3	3	3	3	3	3	3	3	3	3	3	3	İyi	Good
3	3	3	3	3	3	3	3	3	3	3	3	3	3	3	3	güzeldi	it was nice
3	3	3	3	3	3	3	3	3	3	3	3	3	3	3	3	mükemmel	Perfect
4	4	4	4	4	4	4	4	4	4	4	4	4	4	4	4	tatlı bir öğretici	a sweet tutorial
4	4	4	4	4	4	4	4	4	4	4	4	4	4	4	4	Hocamız iyi ve dersi de çok bilgi veriyor genel kültür ve ders anlamında	Our teacher is good and gives a lot of information in terms of general knowledge and lessons.
4	4	4	4	4	4	4	4	4	4	4	4	4	4	4	4	Keyifli ve verimli bir dersti.	It was an enjoyable and productive lesson.
3	3	3	3	3	3	3	3	3	3	3	3	3	3	3	3	A	A.
3	3	3	3	3	3	3	3	3	3	3	3	3	3	3	3	Öğretici	Instructive
4	4	4	4	4	4	4	4	4	4	4	4	4	4	4	4	İlave görüşüm bulunmamaktadır	I have no additional comments
4	4	4	4	4	4	4	4	4	4	4	4	4	4	4	4	Verimli bir dersti	It was a productive lesson
4	4	4	4	4	4	4	4	4	4	4	4	4	4	4	4	HJKL	HJKL
4	4	4	4	4	4	4	4	4	4	4	4	4	4	4	4	öö	am
4	4	4	4	4	4	4	4	4	4	4	4	4	4	4	4	Gayet iyiydi teşekkür ederim	It was very good thank you
1	1	1	1	1	1	1	1	1	1	1	1	1	1	1	1	Deprem sonrası yapılan ilk dersin kayıtlarını ya da ders tekrarını talep ettiğimizde hocamız deprem benim dersimden sonra oldu diyerek akıl tutulması yaşattı hepimize. Kendisini kınıyorum.	When we requested the recordings of the first lesson held after the earthquake or the repetition of the lesson, our teacher made us all lose our minds by saying that the earthquake happened after my lesson. I condemn him.
4	4	4	4	4	3	4	4	4	4	4	4	4	4	4	4	Güzel	Beautiful
4	4	4	4	4	4	4	4	4	4	4	4	4	4	4	4	ders iyiydi	the lesson was good
2	2	2	2	2	2	2	2	2	2	2	2	2	2	2	2	BİR DÜŞÜNCEM YOK	I DON'T HAVE A THOUGHT
2	2	3	3	2	2	2	3	3	3	3	3	3	3	3	3	Çok zor bir ders olduğu gibi hocamız sınavlarıda zor yaptı.	Not only was it a very difficult course, but our teacher also made the exams difficult.
4	4	4	4	4	4	4	4	4	4	4	4	4	4	4	4	problem cozmeyi saglayan bir ders	A lesson that enables problem solving
4	4	4	4	4	4	4	4	4	4	4	4	4	4	4	4	Teşekkürler	Thanks
4	4	4	4	4	4	4	4	4	4	4	4	4	4	4	4	Konusuna tamamen hakim çok bigili ve bilgisini en verimli şelide paylaşan mükemmel bir Hoca	He is an excellent teacher who is completely knowledgeable about his subject and shares his knowledge in the most efficient way.
2	2	3	3	4	4	4	3	4	4	4	4	4	4	4	4	Dönem sonu ödevlerinin içeriği daha anlaşılır verilebilirdi bazı ödevlerde nasıl yapmamız konusunda arkadaşlarımızla fikir ayrılığı yaşadık.	The content of the end-of-term assignments could have been made more understandable. We had a disagreement with our friends about how to do some assignments.
2	2	3	3	3	4	4	3	4	4	4	4	4	4	4	4	Final ödevini yüklemek için sınav zamanında yer açılabilirdi sınavdan sonraya kaldı. Genel olarak ders iyidi	A space could be made available during the exam to upload the final paper, but it was left until after the exam. Overall the course was good
4	4	4	4	4	4	4	4	4	4	4	4	4	4	4	4	Güzeldi teşekkürler	It was nice thank you
4	4	4	4	4	4	4	4	4	4	4	4	4	4	4	4	İş olarak bu sektorde olmama rağmen adını duymadıgım teknıkler terımler oğrendım, ufkumu ctı resmen. Hocamıza tesekkür ederim	Even though I was in this sector for work, I learned techniques and terms that I had never heard of, and it really broadened my horizons. Thank you to our teacher
4	4	4	4	4	4	4	4	4	4	4	4	4	4	4	4	gayet yeterliydi	it was quite enough
4	4	4	4	4	4	4	4	4	4	4	4	4	4	4	4	BAŞARILI BİR DÖNEM İÇİN TEŞEKKÜR EDERİZ.	THANK YOU FOR A SUCCESSFUL TERM.
4	4	4	4	4	4	4	4	4	4	4	4	4	4	4	4	s	s
4	4	4	4	4	4	4	4	4	4	4	4	4	4	4	4	Online dönem boyunca bizim tüm ders materyallerine ulaşmamız için birçok materyal sundu. Derse gelmemiz konusunda ve online derse katılmamız için yapmış olduğu teşvikler çok değerli.. Yüksek enerjisini derse ve bize aşırı geçiriyor. Çok teşekkür ederiz bu zorlu süreçteki emekleri için. ??	He provided many materials for us to access all course materials throughout the online semester. His incentives for us to come to class and participate in online classes are very valuable. He puts his high energy into the class and into us. Thank you very much for your efforts during this difficult process. ??
3	3	3	3	3	3	3	3	3	3	3	3	3	3	3	3	Yok	None
2	2	3	3	3	3	2	2	2	2	2	2	2	2	2	2	Yok	None
4	4	4	4	4	4	4	4	4	4	4	4	4	4	4	4	Yeterli ve faydalı bir ders oldu.	It was an adequate and useful lesson.
4	4	4	4	4	4	4	4	4	4	4	4	4	4	4	4	dersin içeriği çok kapsamlıydı dersin işlenişi de kapsamlıydı. Hocamıza teşekkür ederim	The content of the course was very comprehensive and the teaching of the course was also comprehensive. Thank you to our teacher
4	4	4	4	4	4	4	4	4	4	4	4	4	4	4	4	Grupları karma yerine biz oluştursaydık daha iyi olabilirdi. Onun dışında her şey için teşekkür ederim	It would have been better if we had created the groups instead of mixed groups. Other than that, thank you for everything.
4	4	4	4	4	4	4	4	4	4	4	4	4	4	4	4	Sizi çok seviyorum canım hocam	I love you very much, my dear teacher.
4	4	4	4	4	4	4	4	4	4	4	4	4	4	4	4	Emekleriniz için teşekkür ederiz hocam	Thank you for your efforts, sir.
4	4	4	4	4	4	4	4	4	4	4	4	4	4	4	4	Gayet memnunum.	I am very satisfied.
2	2	2	2	2	2	2	2	2	2	2	2	2	2	2	2	ÖĞRENCİLER İLE DAHA YAPICI BİR ŞEKİLDE İLETİŞİM KURULABİLİR	COMMUNICATION CAN BE ESTABLISHED WITH STUDENTS IN A MORE CONSTRUCTIVE WAY
4	3	4	4	3	3	4	4	4	3	3	3	3	3	3	3	Emekleriniz için teşekkürler	Thanks for your efforts
4	4	4	4	4	4	4	4	4	4	4	4	4	4	4	4	Ödevlerimizin notlarını öğrenebilseydik güzel olurdu. Hala vize notumuzu bilmiyoruz. Onun dışında her şey için teşekkür ederim	It would be nice if we could know the grades of our assignments. We still don't know our visa score. Other than that, thank you for everything.
4	4	4	4	4	4	4	4	4	4	4	4	4	4	4	4	Bu ders bana kendimi geliştirebilmem açısından çok şey kattı. İyi ki Türkiye'nin Yakın Tarihi seçmeli dersini almışım.	This course helped me a lot in terms of improving myself. I'm glad I took the recent Turkish History elective course.
4	4	4	4	4	4	4	4	3	3	3	3	3	3	3	3	Dersin bize kazandırdıkları açısından çok verimliydi . Hiçbir sorunla karşılaşmadım .	The course was very productive in terms of what it gave us. I did not encounter any problems.
2	2	2	2	1	1	1	1	4	3	3	3	3	3	3	3	derste kullanılan kitap dil olarak çok ağır ve anlaşılması zoer bir klitap. aynı şekildehocamzın derste kullandığı dil de çok ağır	The book used in the course is very difficult to understand in terms of language. Likewise, the language our teacher uses in class is also very harsh.
3	3	3	3	3	3	3	3	3	3	3	3	3	3	3	3	Orta bir ders	A medium lesson
2	2	2	2	3	3	2	2	3	1	1	1	1	1	1	1	Ders çok defa iptal edildi, dönemin yarısında ders yapmadık.	Classes were canceled many times, we did not have classes for half the semester.
4	4	4	4	4	4	4	4	4	4	4	4	4	4	4	4	Herşey için teşekkür ederim	thank you for everything
4	4	4	4	4	4	4	4	4	4	4	4	4	4	4	4	gayet iyiydi puanlar bol bol verildi	It was very good, lots of points were given
3	3	3	3	3	3	3	3	3	3	3	3	3	3	3	3	Teknik seçimli derslerde ilgi alanımıza göre bir ders olmadan zorla sunulan derslerden seçmek zorunda kalıyoruz. İlgili olmadığımız konularda verimli de olamıyoruz, ders çeşitliliği arttırılmalı.	In technical elective courses, we have to choose from among the courses that are offered without a course according to our field of interest. We cannot be productive in subjects that we are not interested in; the variety of courses should be increased.
4	4	4	4	4	4	4	4	4	4	4	4	4	4	4	4	sınavlar bir seçmeli derse göre çok zor ve detaydı	The exams were very difficult and detailed for an elective course.
4	4	4	4	4	3	3	4	4	4	4	4	4	4	4	4	Sınav süresi açısından bir dengesizlik vardı. Bu kadar zamanla yarışmamız klasik sorularda verdiğimiz cevapları etkiledi.	There was an imbalance in terms of exam time. Our competition over so much time affected the answers we gave to classic questions.
2	2	2	3	2	2	2	2	3	4	4	4	4	4	4	4	Dersi veren öğretim elemanı yaşı gereği bizimle iyi bir iletişim kuramıyor , derslerde su içmemiz dahi yasak. Dersler çok ağır , monoton ve verimsiz geçiyor.	The instructor teaching the course cannot communicate well with us due to his age, and we are not even allowed to drink water during the lessons. Lessons are very slow, monotonous and unproductive.
3	3	3	3	3	3	3	3	3	3	3	3	3	3	3	3	Uzaktan eğitim olduğu için pek verimli değildi	It was not very productive because it was distance education.
4	4	4	4	4	4	4	3	3	3	3	3	3	3	3	3	Hocamız gayet başarılı, öğrencilerle iletişimi oldukça kuvvetli, istediğimiz zaman saat kaç olursa olsun ulaşabiliriz. Dersimizi de proje ile bütünleştirmesi etkili bir öğrenme yöntemi her şey için çok teşekkürler...	Our teacher is very successful, his communication with the students is very strong, we can reach him whenever we want, no matter what time it is. Integrating our lesson with the project is an effective learning method, thank you very much for everything...
2	2	1	1	2	2	1	3	3	3	3	3	3	3	3	3	Uzaktan eğitim olduğunda derse dikkat vermiyorsunuz yüz yüze eğitim kesinlikle daha iyi onun haricinde ki dersle ilgili teams üzerinden kayıt uzun bı süre açılmadı notlar çok geç Öys'ye geçti o yüzden biz de pek adapte olamadık	When it is distance education, you do not pay attention to the lesson, face-to-face education is definitely better, other than that, registration for the course through teams was not opened for a long time, the grades were transferred to ÖYS very late, so we could not adapt well.
4	4	4	4	4	4	4	4	4	4	4	4	4	4	4	4	Dersin hocasının öğrenciye yaklaşımı onu anlayışı ve yönlendirişi çok olumlu olduğu için der çok verimli geçti.	The course was very productive because the instructor's approach, understanding and guidance towards the student was very positive.
4	4	4	4	4	4	4	4	4	4	4	4	4	4	4	4	Bize sunduğunuz her güzel bilgi için çok teşekkür ederim iyi ki bu bölümü bu dersi seçmişim sizin gibi iyi kalpli, değer gören ve bilen bi öğretmen tanıdım ???	Thank you very much for all the good information you have given us. I am glad that I chose this department and this course. I met a good-hearted, valued and knowledgeable teacher like you.
1	1	1	1	1	1	1	1	1	1	1	1	1	1	1	1	Epostalirama cevap bile vermedi hoca	The teacher didn't even reply to my email.
4	4	4	4	4	4	4	3	3	3	3	3	3	3	3	3	Çok keyifli ders	Very enjoyable lesson
3	3	3	3	3	3	3	3	3	3	3	3	3	3	3	3	Çok teşekkür ederim.	Thank you very much.
4	4	4	4	4	4	4	4	4	4	4	4	4	4	4	4	Çok bilgili ve donanımlı bir profesör fakat ders anlatımında çok iyi olduğunu düşünmüyorum	He is a very knowledgeable and well-equipped professor, but I do not think he is very good at lecturing.
3	3	3	3	3	2	2	3	3	3	3	3	3	3	3	3	Dersin daha anlaşılır anlatılması lazım anlaması zor bir ders ve bolca örnek çözülmesi gerekiyor, hepsi derste çözülemeyeceği için öys den ayrıca soru ve çözümlerin paylaşılması faydalı olacaktır.	The course needs to be explained more clearly. It is a difficult course to understand and many examples need to be solved. Since not all of them can be solved in the course, it would be useful to share the questions and solutions from the ÖYS.
4	4	4	4	4	4	4	4	4	4	4	4	4	4	4	4	Çok değerli Hocama: Dersinize severek katılımda bulundum son zamanlarımdaki iş yoğunluğum sebebiyle derse katkı sağlayamazsam da hoşgörünüzü bizden eksik etmediniz. Beyefendi kişiliğinizle bizi kendinize hayran bıraktınız. Verdiğiniz eğitimle bilgilerimize bilgiler kattık. Sizi saygıyla selamlar akademik hayatınızın başarılarla dolu olmasını temenni ederim. Öğrenciniz Cavit KESİMAL	To my very valuable teacher: I attended your lesson with pleasure, even though I could not contribute to the lesson due to my workload lately, you did not spare us your tolerance. You amazed us with your gentlemanly personality. We added information to our knowledge with the training you provided. I greet you with respect and hope your academic life will be full of success. Your student Cavit KES…
4	4	4	4	4	4	4	4	4	4	4	4	4	4	4	4	Güzel bir ders. İşlenen konular olabildiğince anlaşılır şekilde anlatıldığı için herhangi bir sorun yok.	It's a good lesson. There is no problem since the topics covered are explained as clearly as possible.
3	3	3	3	3	3	3	3	3	3	3	3	3	3	3	3	Dönemin yarısından sonra hiçbir ders videosu yüklenmedi ve ders de yapılmadı. Açıkçası bu ders de benim için dönemin en verimsiz derslerinden birisiydi keşke böyle olmasaydı.	After half of the semester, no lecture videos were uploaded and no lectures were held. Frankly, this course was one of the most unproductive courses of the semester for me. I wish it wasn't like this.
3	3	3	3	3	2	2	2	2	2	2	2	2	2	2	2	Öğretim elemanının dünya mutfağı alanında profesyonel anlamda yüksek lisans seviyesi için uygun olduğunu düşünmüyorum.	I do not think that the lecturer is suitable for a professional master's degree in the field of world cuisine.
4	4	4	4	4	4	4	4	4	4	4	4	4	4	4	4	DERS BASARILİ ŞEKİLDE İŞLENDİ	THE COURSE WAS PROVIDED SUCCESSFULLY
4	4	4	4	4	4	4	4	4	4	4	4	4	4	4	4	Ders dönem başından itibaren hep yüzyüze, üniversite ortamında yapılsaydı daha çok verim alacağımı düşünüyorum.	I think I would be more productive if the course was always held face to face, in a university environment, from the beginning of the semester.
1	1	1	1	1	1	1	1	1	1	1	1	1	1	1	1	Bu dersi 2 senedir alıyorum, dersin kolay ama işleyişin zor olduğunu düşünüyorum. Derse çalışırken her şeyi biliyorum sınavlarda hiçbir şey bilmiyorum. Çok severek çalışıyorum fakat hangi yöntemle çalışırsam çalışayım dersin sınavlarında birinde başarılı oluyorsam diğerinde başarısız oluyorum. Bu ders bana kendimi sorgulatıyor ve çok severek geldiğim Başkent üniversitesine olan sempatimi ve okuma…	I have been taking this course for 2 years, I think the course is easy but the operation is difficult. I know everything while studying, but I know nothing during the exams. I study with great passion, but no matter which method I study, if I succeed in one of the exams of the course, I fail in the other. This course makes me question myself and ends my sympathy and desire to study at Başkent Uni…
1	4	4	4	1	1	1	3	1	1	1	1	1	1	1	1	sadece slayt okunarak geçen bir dersti asla verim alamadım	It was a lesson that was spent just reading slides, I never got any benefit from it.
3	4	4	4	3	4	3	3	3	4	4	4	4	4	4	4	derste canlı kod yazma olabilir sadece slayttan işlemek yetersiz kaldı.	Live coding could be written in the course, but processing only from slides was insufficient.
3	3	3	3	3	3	3	3	3	3	3	3	3	3	3	3	Gayet iyi	pretty good
4	4	4	4	4	4	4	4	4	4	4	4	4	4	4	4	Bu dönem almış olduğum Şirketler Hukuku dersi, hocamızın konularına hakim oluşu, anlatış tarzı ve dersin işleyişiyle birlikte keyifli, güzel bir ders dönemi geçirdim.	I had a pleasant and enjoyable course with the Corporate Law course I took this semester, our professor's command of his subjects, his teaching style and the way the course was conducted.
4	4	4	4	4	4	4	4	4	4	4	4	4	4	4	4	Ders işleyişi güzeldi. Sadece daha az hoca değişimini tercih ederdim.	The lesson process was good. I would just prefer less change of teachers.
4	4	4	4	4	4	4	4	4	4	4	4	4	4	4	4	Sizi çok seviyorum.	I love you so much.
3	3	4	4	3	3	3	3	4	4	4	4	4	4	4	4	Yararlı ama katılım için teşvik edici değildi	Helpful but not encouraging participation
3	3	3	3	3	3	3	3	3	3	3	3	3	3	3	3	ANATOMİYE YARDIMCI VE GÜZEL BİR DERS AYRICA HOCAMIZDA ÇOK TATLI.	IT'S A HELPFUL AND NICE COURSE ON ANATOMY, AND OUR TEACHER IS VERY SWEET.
4	4	4	4	4	4	4	4	4	4	4	4	4	4	4	4	hocamızın emeklerine çok teşekkür ederim	Thank you very much for the efforts of our teacher
4	4	4	4	4	3	3	4	3	4	4	4	4	4	4	4	Öğretmenimizin anadili ingilizce olmadığı için telaffuz dersi konusunda kendisi daha çok geliştirmeli diye düşünüyorum ya da hocamızın yerine ingilizceyi doğuştan beri konuşan birinin gelmesi iyi olacaktır. Hocamızın bazı telaffuz sorunlarının olduğunu düşünüyorum. bunların dışında çok kaliteli bir akademisyen.	Since our teacher is not a native speaker of English, I think he should improve himself more in pronunciation lessons, or it would be good to replace our teacher with someone who has spoken English since birth. I think our teacher has some pronunciation problems. Apart from these, he is a very qualified academician.
1	1	1	1	1	1	1	1	1	1	1	1	1	1	1	1	YOK	NO
4	4	4	4	4	4	4	4	4	4	4	4	4	4	4	4	Çok şey öğrendiğim, dolu dolu, hakkını veren bir ders oldu. Hocama bütün katkıları ve yardımları için sonsuz teşekkürler.	It was a full and rewarding lesson in which I learned a lot. Endless thanks to my teacher for all his contributions and help.
4	4	4	4	4	4	4	4	4	4	4	4	4	4	4	4	Herşey başarılıydı teşekkürler.	Everything was successful, thank you.
4	4	4	4	4	4	4	4	4	4	4	4	4	4	4	4	Teşekkür ederim.	Thank you.
3	3	4	4	4	4	4	4	4	4	4	4	4	4	4	4	7 haftayı bir modül için az bir süre olarak buluyorum .Bence her modülün öğretim süresi uzamalı.	I find 7 weeks to be a short time for a module. I think the teaching time of each module should be extended.
3	3	3	3	3	3	3	3	3	3	3	3	3	3	3	3	YOK	NO
3	3	3	3	3	3	3	3	3	3	3	3	3	3	3	3	YOK	NO
4	4	4	4	4	4	4	4	4	4	4	4	4	4	4	4	Ders tüm öğrencilerin alması zorunlu ortak ders kapsamında değerlendirildiğinden ve dersin tek şubede eş zamanlı işlenmesinden dolayı dönem boyunca online olarak derse katılımda öğrenciler olarak sıkıntı yaşadık.Bu sorun çözüldüğü takdirde ders daha verimli geçecektir.	Since the course was evaluated as a common course that all students must take and the course was taught simultaneously in a single branch, we, as students, had difficulties in attending the course online throughout the semester. If this problem is solved, the course will be more productive.
4	4	4	4	4	4	4	4	4	4	4	4	4	4	4	4	Hocamız çok iyi	Our teacher is very good
3	3	3	3	3	3	3	3	3	3	3	3	3	3	3	3	Ders anlatırken göz teması kursa gerçekten anlatımı etkili bir hoca..	If he maintains eye contact while teaching, he is a truly effective teacher.
4	4	4	4	4	4	4	4	4	4	4	4	4	4	4	4	öğretim elemanından çok memnunduk ders ile ilgili tüm materyalleri kullandı öğrenmemiz için elinden geleni yaptı	We were very pleased with the instructor. He used all the materials related to the course and did his best to help us learn.
3	3	3	3	3	3	3	3	3	3	3	3	3	3	3	3	Çok zor	Very difficult
2	2	2	2	2	2	2	2	2	2	2	2	2	2	2	2	teşekkür ederim	Thank you
4	4	4	4	4	4	4	4	4	4	4	4	4	4	4	4	Yok	None
3	3	3	3	3	3	2	4	3	1	1	1	1	1	1	1	Öğretim elemanı derste sorulan sorulara çoğunlukla azarlayarak cevaplıyor. Konular zamanında yetişmediği için finale video kaydı ile hazırlandık bu da etkin bir yöntem değildi. Girdiğimiz quizler, vize ve finalde de verilen formüllerde hatalar vardı bu da dikkatimizi çok dağıttı.	The instructor mostly answers questions asked in class by scolding them. Since the subjects were not completed on time, we prepared for the final with video recording, which was not an effective method. There were errors in the formulas given in the quizzes we took, midterm and final exams, and this distracted us a lot.
4	4	4	4	4	4	4	4	4	4	4	4	4	4	4	4	YOK	NO
1	1	1	1	1	1	1	1	1	1	1	1	1	1	1	1	Çok saçmaydı sıcaktan yandık ve etkili değildi	It was ridiculous, we got burned from the heat and it wasn't effective.
2	3	2	2	2	1	1	2	3	2	2	2	2	2	2	2	Fazla detay olduğunu ve ilk sınavın detay sorular içerdiğini düşünüyorum. Bölüm dersi olmayıp psikoloji ile ilgili konular seçilse daha iyi olup konuların güzel seçilmediği kanaatindeyim.	I think there are too many details and the first exam contains detailed questions. I believe that it would be better if subjects related to psychology were chosen instead of being departmental courses, but the subjects were not chosen well.
4	4	4	4	4	4	4	3	4	4	4	4	4	4	4	4	Derslerin saat 18.00'da online yapılıyor olması eve servisle uzun sürede dönebilen öğrenciler için gerçekten çok zorlayıcı oluyor, mobil veri kullanarak ve dersten düşmemek için sürekli olarak internetle uğraşmak gerekiyor, bu sebeple derse gerekli dikkatin verilmesi mümkün olmuyor. Çoğu ders saatinde bu sorunu yaşadım, bu sebeple ders saatinin bu durumu göz önünde bulundurarak revize edilmesi ge…	The fact that classes are held online at 18.00 is really challenging for students who can take a long time to return home by shuttle. They have to use mobile data and constantly use the internet to avoid falling out of class, so it is not possible to pay the necessary attention to the lesson. I experienced this problem in most lesson hours, so revising the lesson time taking this situation into c…
3	4	4	4	3	3	3	4	4	4	4	4	4	4	4	4	Bu ders kapsamında teorik bilginin verildiği ders saatlerinde de pratik uygulamalar yapılmalıdır. Laboratuvar saatleri içerisinde anlaşılmayan konulara yönelik çalışmalarda zorluk yaşadım. Ders daha çok gerçekleyerek işlenebilir.	Within the scope of this course, practical applications should also be made during the lecture hours where theoretical knowledge is given. I had difficulty working on topics that were not understood during laboratory hours. The lesson can be taught by doing more.
3	3	3	3	3	3	3	3	3	3	3	3	3	3	3	3	ortak ders olmasına rağmen sınavın detaylı ve zor olduğunu düşünüyorum	Even though it is a common course, I think the exam is detailed and difficult.
1	1	1	1	1	1	1	1	1	1	1	1	1	1	1	1	Derste yapacağımız sunumlar 1 hafta önceden söylendi. Hocamız daha önce haber verdiğini söyledi fakat sınıftaki hiç kimse ödevden haberdar değildi. 1 hafta içinde canla başla çalışarak bir ödev hazırladık. Bu ödevde hak ettiğimiz puanı aldığımızı düşünmüyoruz. Hocamıza neden düşük bir puan aldığımızı sorduğumuzda cevap alamadık. Ödevimizi sunduğumuz hafta, önümüzdeki hafta sunmaları için 3 gruba …	The presentations we will make in the class were announced 1 week in advance. Our teacher said that he had informed us before, but no one in the class was aware of the homework. We prepared an assignment by working diligently within 1 week. We don't think we got the score we deserved on this assignment. When we asked our teacher why we got a low score, we did not get an answer. The week we presen…
4	4	4	4	4	4	4	4	4	4	4	4	4	4	4	4	Hoca gerçekten dersine çok önem vererek çok iyi hazırlanmış ve herkesin öğrenmesi için elinden geleni maksimum düzeyde yapıyor.	The teacher really cares about his lessons and prepares them very well, and he does his best to ensure that everyone learns.
3	2	2	2	2	2	3	3	3	3	3	3	3	3	3	3	En azından final sınavımız çoktan seçmeli olabilirdi	At least our final exam could have been multiple choice
3	3	3	3	4	4	3	3	2	2	2	2	2	2	2	2	Yani eh	So eh
4	4	4	4	4	4	3	3	3	3	3	3	3	3	3	3	Verimli bir dersti	It was a productive lesson
3	3	3	3	3	3	3	3	3	3	3	3	3	3	3	3	iyi	Good
4	4	4	4	4	4	4	4	4	4	4	4	4	4	4	4	Dersin işleyişi ve hocamız çok kaliteliydi, her şey için teşekkürler.	The course process and our teacher were very qualified, thank you for everything.
4	4	4	4	4	4	4	4	4	4	4	4	4	4	4	4	Verimliydi. Hocamız oldukça ilgili davrandı.	It was productive. Our teacher was very attentive.
2	2	2	2	2	2	2	2	2	2	2	2	2	2	2	2	Tşk	Tsk
4	4	4	4	4	4	4	4	4	4	4	4	4	4	4	4	Emekleri için Teşekkür ederim	Thank you for your efforts
4	3	4	3	3	3	4	3	3	3	3	3	3	3	3	3	M	M.
4	4	4	4	4	4	4	4	4	4	4	4	4	4	4	4	GAYET GÜZEL BİR DERSTİ	IT WAS A VERY GOOD COURSE
4	4	4	4	4	4	4	4	4	4	4	4	4	4	4	4	hocalarımdan çok memnum	I am very pleased with my teachers
3	3	3	3	3	3	3	3	3	3	3	3	3	3	3	3	Emekleriniz için teşekkür ederim hocam	Thank you for your efforts, sir.
4	4	4	4	4	4	4	4	4	4	4	4	4	4	4	4	öğretim elamanımızdan gayet memnunduk sadece tek bi konuda olumsuzluk yaşadık kendi içimizde biz ödevlerin zamanına dikkat etmemize ve bu sorumluluğu alabilecek kapasitemizin olmasına rağmen son ödevimizde bi kaç kişinin ödevi geç yollaması fakat hocamızın geç yollanan ödevlere rağmen bunu kabul etmesini yanlış buldum bu biraz haksızlık oldu onun dışında her hafta biraz aynı konular üzerinden git…	We were very happy with our instructor, we only had one negative issue. Even though we paid attention to the timing of the assignments and had the capacity to take on this responsibility, in our last assignment, a few people sent the assignment late, but I found it wrong that our teacher accepted this despite the late assignments. This was a bit unfair, other than that, I think we went through th…
4	3	4	4	4	4	4	4	4	4	4	4	4	4	4	4	Güzel bir deneyim	nice experience
4	4	4	4	4	4	4	4	4	4	4	4	4	4	4	4	Saygıdeğer hocamız sayesinde bölümüme ve okulumuza olan saygım arttı kendisine emekleri için teşekkür ediyorum.	Thanks to our esteemed professor, my respect for my department and our school has increased. I thank him for his efforts.
4	4	4	4	4	4	4	4	4	4	4	4	4	4	4	4	Dersin içeriği oldukça yararlıydı. Öğretim elemanının iletişim becerisi, konu anlatımı, tavır ve tutumları, destekçiliği ve motivasyonu süperdi. Dersi çok sevdirdi. Kullanılan materyaller oldukça yararlıydı, alıştırmalar oldukça etkili oldu.	The content of the course was very useful. The instructor's communication skills, explanation of the subject, attitude, support and motivation were excellent. He loved the lesson very much. The materials used were very useful, the exercises were very effective.
4	3	4	4	4	4	4	4	4	4	4	4	4	4	4	4	inanılmaz bir öğretmen çok seviyorum. verdiği emeklerin değeri ölçülemez	He is an incredible teacher, I love him very much. The value of his efforts cannot be measured
3	3	3	3	3	3	3	3	3	3	3	3	3	3	3	3	GSB dersi olmasına rağmen kendi bölüm dersimiz kadar zorlandık. GSB seçimlerini ders programlarımıza göre alıyoruz zorunlu olarak. Ama çok zorlandık. Diğer GSB derslerini alan arkadaşlarımızla karşılaştırma yaptığımız zaman maalesef adaletsiz bir grafik ortaya çıkıyor. Bu açıdan üzgün olduğumu belirtmek istiyorum.	Even though it was a GSB course, we had as much difficulty as our own department course. We compulsorily take GSB selections according to our course schedules. But we had a hard time. Unfortunately, when we compare with our friends taking other GSB courses, an unfair graph emerges. I would like to express my regret in this respect.
4	4	4	4	3	4	3	4	4	4	4	4	4	4	4	4	Değerli hocama iktisadi matematik alanında bana kattığı değerli bilgiler ve bu alanda olan gelişimime katkısından dolayı teşekkür ediyorum.	I would like to thank my dear teacher for the valuable information he provided me in the field of economic mathematics and his contribution to my development in this field.
3	3	3	3	3	3	3	3	3	3	3	3	3	3	3	3	Hocam emekleriniz için teşekkür ederim :)	Thank you sir for your efforts :)
3	3	3	3	3	3	3	3	3	3	3	3	3	3	3	3	Yok	None
2	2	2	2	2	2	2	2	2	2	2	2	2	2	2	2	Teşekkür ederim	Thank you
4	4	4	4	4	4	4	4	4	4	4	4	4	4	4	4	Çok iyiydi bi sıkıntı yok	It was very good, no problems
3	2	3	3	3	3	3	3	2	3	3	3	3	3	3	3	Yeterli	Sufficient
4	4	4	4	4	4	3	4	4	4	4	4	4	4	4	4	Meteryal ve diğer görsel video vb..gayet başarılı Hocamızın bilgi birikimi anlatım tarzı ve dersi hakimiyetine ayrıca tşk ederim çok başarılı herşy için tşk ederim çok verimli bir eğitimdi	Materials and other visual videos etc.. are very successful. I would also like to thank our teacher for his knowledge, teaching style and mastery of the lesson. It was very successful. Thank you for everything. It was a very productive training.
3	3	3	3	3	3	3	3	3	3	3	3	3	3	3	3	Güzel bir ders	nice lesson
2	2	2	3	3	3	3	4	4	4	4	4	4	4	4	4	İYİ.	GOOD MORNING MY BABY.
4	4	4	4	4	4	4	4	4	4	4	4	4	4	4	4	Çok iyi	Very good
4	4	4	4	4	4	4	4	4	4	4	4	4	4	4	4	Güzel ve verimli geçti	It was nice and productive
3	3	3	3	3	3	3	3	3	3	3	3	3	3	3	3	İyi	Good
4	4	4	4	4	4	4	4	4	4	4	4	4	4	4	4	Verimli geçti	It was productive
4	4	4	4	4	4	4	4	4	4	4	4	4	4	4	4	Bu dersi 1 ya da ikinci sınıfta alırsak sunumlarda makaleleri daha iyi anlayıp sunmamız kolaylaşabilir	If we take this course in the first or second grade, it may be easier for us to understand and present the articles better in presentations.
4	4	4	4	4	4	4	4	4	4	4	4	4	4	4	4	Hocamız sorumluluklarını bilen ve aynı sorumluluk bilincini bizden de bekleyen biri. Bence de olması gereken buydu. Derslerimiz gayet güzel ve faydalı geçti. İngilizce dersini pek sevmeyen biri olarak hocamın bana bu konuda yardımcı olduğunu söyleyebilirim.	Our teacher is someone who knows his responsibilities and expects the same sense of responsibility from us. I think this is what should have happened. Our lessons were very good and useful. As someone who does not like English lessons very much, I can say that my teacher helped me in this regard.
3	3	3	3	3	3	3	3	3	3	3	3	3	3	3	3	Cok iyi	Very good
3	3	3	3	2	1	1	3	3	3	3	3	3	3	3	3	Öğretim dönemi boyunca öğretim üyesinin ses düzeyinin öğrenciye ulaşılabilir düzeyde olmadığı tekrar ve tekrar iletildi ancak bu konuda hiçbir iyileştirme yapılmadı. Ve bu öğrencilerin öğrenim düzeyini negatif etkiledi.	Throughout the teaching period, it was repeatedly communicated that the faculty member's voice level was not at a level accessible to the student, but no improvement was made in this regard. And this negatively affected the education level of students.
4	4	4	4	4	4	4	4	4	4	4	4	4	4	4	4	Uzaktan eğitim hisse vermeyen bir dersti yine de, bir kısmı canlı ders şeklinde olabilir.	Distance education was a course that did not give shares, but some of it could be in the form of live lessons.
3	3	3	3	3	3	3	3	3	3	3	3	3	3	3	3	uzaktan eğitimin çok verimli olduğunu düşünmüyorum.	I don't think distance education is very efficient.
4	4	4	4	4	4	4	4	4	4	4	4	4	4	4	4	dersin hocası kaliteli bir ders işlenmesi için elinden geleni yapıyor. Sadece genel ENGL101 dersi için şunu söylemeliyim ki daha fazla konuşma yapılmalı. Hatta sınavlara eklenebilir. Son olarak da akademik terimlere daha fazla ağırlık verilmeli.	The instructor of the course does his best to provide a quality lesson. Just for the general ENGL101 course, I have to say that there should be more talks. It can even be added to exams. Finally, more emphasis should be placed on academic terms.
4	4	4	4	4	4	4	4	4	4	4	4	4	4	4	4	Güzel ve verimli geçti	It was nice and productive
3	4	4	4	3	3	3	3	4	4	4	4	4	4	4	4	Soru çözümlerinde biraz daha yavaş ve detaylı şekilde ilerlenebilir.	Question solutions can be progressed a little slower and in more detail.
3	3	3	3	3	3	3	3	4	4	4	4	4	4	4	4	Ders konusuda zorluk çekmedim hocamız da gayet işini bilen biriydi teşekkür ederim.	I had no difficulty in the course and our teacher was very knowledgeable, thank you.
3	3	3	3	3	3	2	2	2	2	2	2	2	2	2	2	Süpersiniz böyle devam hocam	You are great, keep it up sir.
4	3	3	3	3	4	3	4	4	4	4	4	4	4	4	4	teorik bilgileri anlatan hocamız gayet anlaşılır bir anlatımı vardı ancak pratik olayı anlatan hocamız bazı konularda ikilemde kalması ve soruların cevaplarını biraz hızlı geçmesi bizim açımızdan yeri geldi verimsiz bazen de kafa karışıklığına neden oldu ama onun dışında dersin her iki hocasından da memnunum	Our teacher, who explained the theoretical information, had a very understandable explanation, but our teacher, who explained the practical events, was in a dilemma on some issues and answered the questions a little quickly, which was inefficient for us and sometimes caused confusion, but other than that, I am satisfied with both instructors of the course.
4	4	4	4	4	4	4	4	4	4	4	4	4	4	4	4	Proje yönetimi dersinin icerigi dikkat çekiciydi. Konu başlıkları detayli şekilde anlatıldı. öğretim elemanının bilgi birikimini aktarma şekli, ders içi yönlendirmeleri ve yaklaşımı cok iyiydi. Teşekkürler.	The content of the project management course was remarkable. Topics were explained in detail. The instructor's way of transferring his knowledge, in-class guidance and approach were very good. Thanks.
4	4	4	4	4	4	4	4	4	4	4	4	4	4	4	4	Dersin işlenişi ve içeriği oldukça verimli olmakla birlikte ilgili kazanımların dahil olduğu yazılı pratik çalışmaları da yapılırsa çok daha verimli bir dönem geçirilebilirdi diye düşünüyorum.	Although the teaching and content of the course are quite productive, I think that a much more productive semester could be had if written practical studies, including the relevant achievements, were also carried out.
3	3	3	3	3	3	3	3	3	3	3	3	3	3	3	3	Bu dersin en başından beridir amacını sağlamadığını düşünüyorum.	I think this course has not achieved its purpose from the very beginning.
4	4	4	4	4	4	4	4	4	4	4	4	4	4	4	4	Daha çok uygulama yapılabilir.	More applications can be made.
3	4	4	3	4	3	4	3	4	3	3	3	3	3	3	3	hocamıza her sey için teşekkür ederim .	I thank our teacher for everything.
3	3	3	3	3	3	3	3	3	3	3	3	3	3	3	3	iyi	Good
3	3	3	3	3	3	3	3	3	3	3	3	3	3	3	3	KİTAP ÜCRETLERİ ÇOK PAHALI VE DERS NOTUNU ETKİLEDİĞİ İÇİN BİZLERİ ZOR DURUMDA BIRAKIYOR	BOOK FEES ARE VERY EXPENSIVE AND IT LEAVES US IN A DIFFICULT SITUATION BECAUSE IT AFFECTS THE COURSE GRADES
4	4	4	4	4	4	4	4	4	4	4	4	4	4	4	4	Dersin işlenişi ve hocasından çok memnunum	I am very pleased with the course and the instructor.
4	4	4	4	4	4	4	4	4	4	4	4	4	4	4	4	eıoeı	eioei
4	4	4	4	4	4	4	4	4	4	4	4	4	4	4	4	Ders işleyişi çok güzeldi	The coursework was very good
4	4	4	4	4	4	4	4	4	4	4	4	4	4	4	4	güzel dersti	It was a good lesson.
4	4	4	4	4	4	4	4	4	4	4	4	4	4	4	4	iyiydi	it was good
4	4	4	4	4	4	4	4	4	4	4	4	4	4	4	4	Gayet zevkli ve öğretici bir dersti	It was a very enjoyable and instructive lesson.
4	4	4	4	4	4	4	4	4	4	4	4	4	4	4	4	Çok iyi	Very good
3	3	3	3	3	3	3	3	3	3	3	3	3	3	3	3	Yok	None
4	4	4	4	4	4	4	4	4	4	4	4	4	4	4	4	akilda kalici bir sekilde ders isledik	We taught in a memorable way
3	3	3	2	2	3	3	3	3	3	3	3	3	3	3	3	Zor bir dersti	It was a hard lesson
4	4	4	4	4	4	4	4	4	4	4	4	4	4	4	4	Yok	None
4	4	4	4	4	4	4	4	4	4	4	4	4	4	4	4	Memnunum	I'm satisfied
1	1	1	1	1	1	1	1	1	1	1	1	1	1	1	1	Lisans eğitimimde A harf notu ile geçtiğim bir dersti ve çok iyi bir öğretim görevlisi hocamız vardı. Buarada aldığım ders hayal kırıklığı. Tez için hiçbir yetkinliğe sahip değilim. Hocamızın bir defteri var sürekli oradan not yazdırdı. Öğretme tekniği sadece ezber yaptırmaktı. Verilen ödevler öğretici nitelikte değildi. Final sınavı ise öğretilenlere göre çok zordu. Bu harf notu ile geçmeyi hake…	It was a course that I passed with a letter grade A in my undergraduate education and we had a very good lecturer. The lesson I learned here is disappointment. I have no qualifications for the thesis. Our teacher has a notebook and he always made notes from there. His teaching technique was only to make people memorize. The assignments given were not instructive. The final exam was very difficult…
4	4	4	4	4	4	4	4	4	4	4	4	4	4	4	4	Çok iyi hoca	Very good teacher
4	4	4	4	4	4	4	4	4	4	4	4	4	4	4	4	iyiydi	it was good
3	3	3	3	3	3	3	3	3	3	3	3	3	3	3	3	Ders verimli sayılırdı.	The lesson was considered productive.
4	4	4	4	4	4	4	4	4	4	4	4	4	4	4	4	Ders içerisinde öğretmenimizin bizlere karşı tutumu ve dersin anlaşılma düzeyi çok yüksekti . Verimli bir dönem geçirdik.	Our teacher's attitude towards us during the lesson and the level of understanding of the lesson were very high. We had a productive period.
1	1	1	1	1	1	1	1	1	1	1	1	1	1	1	1	Notlarımı bilerek yanlış girmişti.	He deliberately entered my grades incorrectly.
4	4	4	4	4	4	4	4	4	4	4	4	4	4	4	4	Bilgilendirici ve verimli geçen bir süreçti.	It was an informative and productive process.
4	4	4	2	1	4	4	4	4	4	4	4	4	4	4	4	Quizlere ve deneye hazırlanmamız için verilen sunumlar çok eski olduğu için anlaşılırlığı çok düşük. Deney raporlarımızın okunma süresi çok uzun olduğu için yaptığımız hataları ileride yazdığımız raporlarda düzeltemedik. Rapor formatında belirtilmeyen kurallardan dolayı bizim puanlarımızdan kırıldı.	The presentations given to us to prepare for the quizzes and experiments are very old and therefore their understandability is very low. Since the reading time of our test reports was too long, we could not correct the mistakes we made in future reports. It was deducted from our scores due to rules not specified in the report format.
4	4	4	4	4	4	4	4	4	4	4	4	4	4	4	4	Ders işlenişi ve öğretmenimizin bizlere karşı tutumu yeterliydi.	The way the lesson was taught and our teacher's attitude towards us were sufficient.
4	4	4	4	4	4	4	4	4	4	4	4	4	4	4	4	her şey için teşekkürler	thank you for everything
4	4	4	4	4	4	4	4	4	4	4	4	4	4	4	4	Çok keyifli bir dersti. teşekkürler.	It was a very enjoyable lesson. thanks.
4	4	4	4	4	4	4	4	4	4	4	4	4	4	4	4	TEŞEKKÜRLER	THANKS
4	4	4	4	2	3	4	4	4	4	4	4	4	4	4	4	Bence derste kullanılan kaynak, birinci sınıfa yeni başlamış bir Hukuk Fakültesi öğrencisi için fazla bilgi barındırıyor ve anlaşılması zor.	In my opinion, the source used in the course contains too much information and is difficult to understand for a first-year Law School student.
4	4	4	4	4	4	4	4	4	4	4	4	4	4	4	4	Teşekkürler	Thanks
4	4	4	4	4	4	4	4	4	4	4	4	4	4	4	4	iyi	Good
2	1	2	2	2	2	2	1	2	2	2	2	2	2	2	2	Dersin içeriği çok yoğun ve biz ders içerisinde bazı konuları hiç işlemedik bile. Dersin sorumlusu derse katılmadığımız için bu konulara değinmediğini bahsetti. Derse yeterince katılım sağlandığını düşünüyorum. Ben şahsen hocanın vakti tam geçsin hepsinden bahsetsin diye olabilecek sorularım ile vakti azaltmak istemem. O vakitte kendi deneyimleri olur, ya da bizim bilgilenmemizi istediği durumlar…	The content of the course is very intense and we did not even cover some topics in the course. The lecturer said that he did not mention these issues because we did not attend the lecture. I think there was sufficient participation in the course. Personally, I do not want to waste the teacher's time with any questions I may have so that he/she can talk about everything. At that time, he could hav…
4	4	4	4	4	4	4	4	4	4	4	4	4	4	4	4	Harika	Great
3	3	3	3	3	3	3	3	3	3	3	3	3	3	3	3	Gayet yeterliydi	It was quite enough
3	3	3	3	4	4	4	4	4	4	4	4	4	4	4	4	Biraz zorlayıcı bir dersti.	It was a bit of a challenging course.
3	3	3	3	3	3	3	3	3	3	3	3	3	3	3	3	Güzel	Beautiful
4	4	4	4	4	4	4	4	4	4	4	4	4	4	4	4	Hocamız gerçekten idare hukukunu bize sevdirdi. vizelerde çalışma düzeninde sorun yaşamış olsam da finalde hocamızın anlatım dilini hem daha iyi kavramış oldum hem de çok faydalı olacak şekilde anlattı tüm dersleri.	Our teacher really made us love administrative law. Even though I had problems with the study routine during the midterms, in the final I was able to understand our teacher's language better and he explained all the lessons in a very useful way.
4	4	4	4	4	4	4	4	4	4	4	4	4	4	4	4	Ders çok keyifliydi. Ne eksik ne fazlaydı. Hocama teşekkürler ediyorum.	The lesson was very enjoyable. There was nothing more, nothing less. I thank my teacher.
4	4	4	4	4	4	4	4	4	4	4	4	4	4	4	4	katkılarınız için teşekkür ederiz	Thank you for your contributions
4	4	4	4	4	4	4	4	4	4	4	4	4	4	4	4	hocamız çok iyiydi çok güzel ders anlatıyor keşke her hocamız onun gibi olsa	Our teacher was very good, he teaches very well, I wish all our teachers were like him.
3	3	3	3	4	2	2	2	2	2	2	2	2	2	2	2	her şey için teşekkürler	thank you for everything
4	4	4	4	4	4	4	4	4	4	4	4	4	4	4	4	Hocamız dersi çok açık ve anlaşılır bir şekilde anlatıyor bunun için çok teşekkür ederim.	Our teacher explains the lesson in a very clear and understandable way, thank you very much for that.
3	3	3	3	3	3	3	3	3	3	3	3	3	3	3	3	yok	no
4	4	4	4	4	4	4	4	4	4	4	4	4	4	4	4	Yok	None
1	3	1	1	1	1	1	1	1	1	1	1	1	1	1	1	Ders slayttan okunarak işlendi ancak ders sayısal bir ders olduğu için bu şekilde anlaşılması mümkün değil. Ayrıca öğretim elemanının dili anlaşılır değil. Zaten bu durum vize ve final not ortalamalarından gayet net anlaşılmakta. Notların düşük olduğunu fark etmesi üzerine herkese 10 puan eklemesine rağmen vize sınıf ortalaması 19 dan yukarı çıkamadı. Bu durumun öğrencilerin slaytları not almamas…	The course was taught by reading from the slide, but since the course is a numerical course, it is not possible to understand it this way. Also, the instructor's language is not understandable. This situation is clearly understood from the midterm and final grade averages. Although he added 10 points to everyone when he realized that the grades were low, the midterm class average could not go abo…
4	4	4	4	4	4	4	4	4	4	4	4	4	4	4	4	Hocamıza teşekkür ederiz	Thank you to our teacher
4	4	4	4	4	4	4	4	4	4	4	4	4	4	4	4	Sizi bir sonraki dönem göremeyecek olmak beni çok üzmekte. Umarım çok daha iyi yerlere ulaşırsınız ve istediğiniz şekilde işinizi yaparsınız. Emekleriniz için teşekkür ederim. Her şey gönlünüzce olsun. Sevgilerle.	It makes me very sad that I won't be able to see you next term. I hope you reach much better places and do your job the way you want. Thank you for your efforts. All the best. With love.
4	4	4	4	4	4	4	4	4	4	4	4	4	4	4	4	biraz zor bi ders olsa da hocamı seviyorum ve verimli oldugunu düşünüyorum	Even though it is a bit difficult, I like my teacher and I think it is productive.
3	3	3	3	3	3	3	3	3	3	3	3	3	3	3	3	K	K
4	4	4	4	4	4	4	4	4	4	4	4	4	4	4	4	Teşekkür ederim	Thank you
4	4	3	3	3	3	3	3	3	3	3	3	3	3	3	3	İyiydi	it was good
3	3	3	3	3	3	3	3	3	3	3	3	3	3	3	3	Yok	None
3	3	3	3	3	3	3	3	4	4	4	4	4	4	4	4	hoca çoğunlukla slayttan okuyarak ders işledi daha interaktif olabilirdi.	The teacher taught mostly by reading from slides, it could have been more interactive.
4	4	4	4	4	4	4	4	4	4	4	4	4	4	4	4	Gayet iyiydi	It was fine
3	3	3	3	3	4	4	3	3	2	2	2	2	2	2	2	Derste verdiğiniz katkılar için teşekkür ederim.	Thank you for your contributions to the course.
4	4	4	4	4	4	4	4	4	4	4	4	4	4	4	4	Mükemmel bir hoca	An excellent teacher
4	4	4	4	3	4	4	4	4	4	4	4	4	4	4	4	bu ders ve hocam bana çok şey kattı çok teşekkür ediyorum	This course and my teacher helped me a lot, thank you very much.
3	3	3	3	3	3	3	3	3	3	3	3	3	3	3	3	Teşekkürler	Thanks
4	4	4	4	4	4	4	4	4	4	4	4	4	4	4	4	Çok güzel	Very good
4	4	4	4	4	4	4	4	4	4	4	4	4	4	4	4	Hocamız hem dersleri en kolay şekilde anlattı hemde bizler ile en iyi şekilde ilgilendi çok teşekkür ederim	Our teacher explained the lessons in the easiest way and took care of us in the best way, thank you very much.
4	4	4	4	4	4	4	4	4	4	4	4	4	4	4	4	Güzel bir dönemdi.	It was a good time.
3	3	3	3	3	3	3	3	3	3	3	3	3	3	3	3	Çok iyi	Very good
1	1	1	1	1	1	1	1	1	1	1	1	1	1	1	1	Hocamızın bu derste yeterli ilgi ve özen gösterdiğini düşünmüyorum. Ve maalesef ki sınav hazırlama sisteminde de çok eksiklikler olduğunu düşünüyorum. Genel olarak hocamızın yeni tecrübeleri olduğu için böyle olduğunu söylüyorlar ama umarım hocamız bu yorumları da göz önünde bulundurarak daha dikkatli bir ders anlatımı ve sınav hazırlama+ puan sistemi yapar.	I don't think our teacher showed enough interest and care in this lesson. And unfortunately, I think there are many deficiencies in the exam preparation system. Generally, they say that this is because our teacher has new experiences, but I hope that our teacher will take these comments into consideration and make a more careful lecture and exam preparation + point system.
4	4	4	4	4	4	4	4	4	4	4	4	4	4	4	4	Çok güzel bir dersti.	It was a very good lesson.
4	4	4	2	3	4	4	4	4	4	4	4	4	4	4	4	Zaten derse 2 kişi katılım sağladığımız için çok verimli oldu.	It was very productive since only 2 people participated in the course.
4	4	4	4	4	4	4	4	4	4	4	4	4	4	4	4	Güzel bir dönemdi	It was a good time
3	3	3	3	3	3	3	3	3	3	3	3	3	3	3	3	Teşekkürler	Thanks
4	4	4	4	4	4	4	4	4	4	4	4	4	4	4	4	olumlu	positive
4	4	4	4	4	4	4	4	4	4	4	4	4	4	4	4	İyi	Good
4	4	4	4	4	4	3	3	3	3	3	3	3	3	3	3	İyi	Good
4	4	4	4	4	3	3	4	3	4	4	4	4	4	4	4	Dersin içeriği zorladı	The content of the course was challenging
3	3	3	3	3	3	3	3	3	3	3	3	3	3	3	3	Faydalı ve zevkli bir dersti	It was a useful and enjoyable lesson.
3	3	3	3	3	3	3	3	3	3	3	3	3	3	3	3	Ders hakkında bilgilendirme ve ödevler yeterliydi	Information about the course and homework were sufficient.
4	4	4	4	4	4	4	4	4	4	4	4	4	4	4	4	sıkıcı dersi eğlenceli yapan bir öğretmen	A teacher who makes boring lessons fun
2	2	2	2	2	2	2	2	2	2	2	2	2	2	2	2	Notlarımızın yüksek olmasına rağmen sırf ödevi yapmadık diye birçok kişiyi bırakmasının haksızlık olduğunu düşünüyorum	I think it's unfair that even though our grades are high, many people drop out just because we didn't do the homework.
3	3	3	3	3	3	3	3	3	3	3	3	3	3	3	3	online sistem kötü oldu	online system is bad
3	3	3	3	3	3	3	3	3	3	3	3	3	3	3	3	Güzeldi teşekkürler	It was nice thank you
3	3	3	3	3	3	3	3	3	3	3	3	3	3	3	3	Yok	None
4	4	4	4	4	4	4	3	3	3	3	3	3	3	3	3	Dersin içeriği oldukça zevkli ve yararlı. Öğretmenimiz derse katılmaya teşvik ediyor.	The content of the course is quite enjoyable and useful. Our teacher encourages us to participate in class.
4	4	4	4	4	4	4	4	4	4	4	4	4	4	4	4	Sadece okulda değil bütün yaşantımızda etkili olan bir ders.	It is a lesson that is effective not only at school but in all our lives.
4	4	4	4	4	4	4	4	4	4	4	4	4	4	4	4	TEŞEKKÜRLER	THANKS
4	4	4	4	4	4	4	4	4	4	4	4	4	4	4	4	Verimli bir dersti	It was a productive lesson
4	4	4	4	4	4	4	4	4	4	4	4	4	4	4	4	M ÖMJJ	M ÖMJJ
4	4	4	4	4	4	4	4	4	4	4	4	4	4	4	4	Teşekkürler	Thanks
4	4	4	4	4	4	4	4	4	4	4	4	4	4	4	4	iyi	Good
3	3	3	3	3	3	3	3	3	3	3	3	3	3	3	3	Yok	None
4	4	4	4	4	4	4	4	4	4	4	4	4	4	4	4	Güzel bi dönemdi	It was a good time
4	4	4	4	4	4	4	4	4	4	4	4	4	4	4	4	Güzel bir dönemdi	It was a good time
3	3	3	3	3	3	3	3	3	3	3	3	3	3	3	3	Yok	None
4	4	4	4	4	4	4	4	4	4	4	4	4	4	4	4	Çok iyiydi	It was very good
4	4	4	4	4	4	4	4	4	4	4	4	4	4	4	4	kolay bir dersti	it was an easy lesson
4	4	4	4	4	4	4	4	4	4	4	4	4	4	4	4	keyifliydi	it was enjoyable
4	4	4	4	4	4	4	4	4	4	4	4	4	4	4	4	Her şey iyiydi	everything was fine
4	4	4	4	4	4	4	4	4	4	4	4	4	4	4	4	Hocamız bizleri biraz zorlasa da gerçekten bize idare hukukunu öğretmek için çok çabalıyor. Birinci dönem dersten kaldığım halde bu dersi çok iyi öğrenmiş gibi hissediyorum ki bir hukuk öğrencisi için önemli olan dersleri geçmektense iyi bir şekilde öğrenmek. Bunun dışında hibrit model sebebiyle hocanın slaytları bizlere vermesi çok faydalı oldu. Çalışmak için kitabın özeti mahiyetinde güzel bir …	Although our teacher pushes us a little, he really tries hard to teach us administrative law. Even though I failed the course in the first semester, I feel like I learned this course very well. The important thing for a law student is to learn the courses well rather than passing them. Apart from this, it was very useful for the teacher to give us the slides due to the hybrid model. It is a good …
2	2	2	3	3	3	3	4	4	2	2	2	2	2	2	2	Eğitim uzaktan olduğu için iletişim kopukluğu yaşandı alınan kararlar hemen bizlere ulaşmadı.Dersin içeriği ve kullanılan materyaller yeterliydi.	Since the education was distance-based, there was a communication gap and the decisions taken did not reach us immediately. The content of the course and the materials used were sufficient.
3	3	3	3	3	3	3	3	3	3	3	3	3	3	3	3	güzel	Beautiful
4	4	4	4	4	4	4	4	4	4	4	4	4	4	4	4	Çok iyi	Very good
4	4	4	3	4	4	4	4	4	4	4	4	4	4	4	4	G1-11 de yaşanan sorun bireyseldir. Dönem boyunca internetten verilen derslerde internet altyapı sorunu yaşamamdan kaynaklı erişim sorunu yaşanmıştır. Araştırma Yöntemleri dersi içeriğinde akademik yazım sürecine destek nitelikli olan yazılımlarında(SPSS vb.) içeriğe eklenmesinin katkı sağlayacağını düşünmekteyim.	The problem experienced in G1-11 is individual. During the semester, there were access problems in the courses given online due to the internet infrastructure problem. I think that adding software that supports the academic writing process (SPSS, etc.) to the content of the Research Methods course will contribute to the content.
3	3	3	3	3	3	3	3	3	3	3	3	3	3	3	3	Uzaktan olacak şekilde geçirdiğimiz bir ders dönemi oldu zor bir ders ve bence gerekli değil bu bölüm için.	It was a difficult course that we spent remotely, and I think it is not necessary for this department.
3	3	3	3	3	3	3	3	3	3	3	3	3	3	3	3	Güzel bir derstti	It was a good lesson
4	4	4	4	4	4	4	4	4	4	4	4	4	4	4	4	Hocamız gayet dersi güncel örnekler ile keyifli bir şekilde anlatmıştır.	Our teacher explained the lesson in a very enjoyable way with current examples.
3	3	4	4	4	4	4	4	4	4	4	4	4	4	4	4	Dönem başından sonuna kadar hocamızın ders içerisindeki anlatımından ve materyallere olsun gayet iyi bir şekilde bizlere çok iyi aktardı.Hocama herşey için çok teşekkür ederim.	From the beginning to the end of the semester, our teacher explained the course materials to us very well. I would like to thank my teacher very much for everything.
3	3	3	3	3	3	3	3	3	3	3	3	3	3	3	3	Yok	None
3	3	3	3	3	3	3	3	3	3	3	3	3	3	3	3	yeterince iyidi	was good enough
3	3	3	3	3	3	3	3	3	3	3	3	3	3	3	3	Zor bir dönemdi depremin yaşanması tüm ülkeyle birlikte öğrencilerin adapte oluşunu da etkiledi,okulların bir online bir yüzyüze olmasından kaynaklı çok odaklanamadım. Hocamızın iletişimi gayet uyumlu ve teşvik ediciydi.	It was a difficult time. The earthquake affected the adaptation of the students as well as the whole country. I could not focus much because the schools were online and face to face. Our teacher's communication was very harmonious and encouraging.
3	3	3	3	3	3	3	3	3	3	3	3	3	3	3	3	Normal bir ders	a normal lesson
4	4	4	4	4	4	4	4	4	4	4	4	4	4	4	4	mukemmel	Perfect
2	2	2	2	2	2	2	2	2	2	2	2	2	2	2	2	Ders yüzeysel işlenip sınavda detaylı soruluyor.Dersin kaynak kitabı yeterli donanımda değil bu nedenle sınavlarda sorun yaşadım.	The course is taught superficially and questions are asked in detail in the exam. The source book of the course is not sufficiently equipped, so I had problems in the exams.
3	3	3	3	3	3	3	3	3	3	3	3	3	3	3	3	güzeldi, öğreticiydi	it was nice and instructive
3	3	3	3	3	3	3	3	3	3	3	3	3	3	3	3	Uzaktan eğitimle yapılan sınav çok efektif değildi ve hata doluydu. Mağduriyet yaşandığını düşünüyorum ve hocaya bu nedenle ulaşmak zordu.	The exam conducted via distance education was not very effective and full of errors. I think there was victimization and it was difficult to reach the teacher for this reason.
4	4	4	4	4	4	4	4	4	4	4	4	4	4	4	4	Staj çok kısaydı ama rapor için beklenen sonuç uzun sürede görülebilirdi	The internship was very short, but the expected results for the report could be seen in a long time.
4	4	4	4	4	4	4	4	4	4	4	4	4	4	4	4	Güzel	Beautiful
4	4	4	4	4	4	4	4	4	4	4	4	4	4	4	4	Uzaktan eğitim benim için her ne kadar faydalı olmasa da elimden geleni yapmaya çalıştığım bir dönem ve ders oldu. Hocamızın ders anlatışı etkili oldu.	Even though distance education was not beneficial for me, it was a period and course in which I tried to do my best. Our teacher's lecture was effective.
1	1	1	1	1	1	1	1	1	1	1	1	1	1	1	1	Hiç ilgili bir hoca değildi. Derste ne öğrendiğimi ne gördüğümüzü bile anlamadım.	He was not a caring teacher at all. I didn't even understand what I learned or saw in the lesson.
4	4	4	4	4	4	4	4	4	4	4	4	4	4	4	4	Kolay ve keyifliydi	It was easy and enjoyable
4	4	4	4	4	4	4	4	4	4	4	4	4	4	4	4	Sayın Hocamıza tüm katkıları için teşekkür ediyorum.	I would like to thank our esteemed teacher for all his contributions.
4	4	4	4	4	4	4	4	4	4	4	4	4	4	4	4	Hocamıza teşekkür ederim. Verimli, etkin ve faydalı bir dönem geçirdik.	Thank you to our teacher. We had a productive, effective and useful period.
4	4	4	4	4	4	4	4	4	4	4	4	4	4	4	4	Hem danışman hocamız olarak hem de ders anlamında bize her zaman yardımcı olan hocama sevgiler çok teşekkür ediyorum .	I would like to thank my teacher, who always helps us both as our advisor and in the classroom.
4	4	4	4	4	4	4	4	4	4	4	4	4	4	4	4	Bu dersi severek aldığım için mutluyum. Hocamız derse karşı olan ilgimizi arttırdı. Çeşitli sorularla her hafta katılım gösterdik. Bu ders bir öğretmen adayının mutlaka alması gereken bir ders. Çünkü sınıf ortamında her öğrenciyle karşılaşmamız mümkün. DEHB?li öğrencilerimiz olduğunda onlara karşı artık nasıl yaklaşmamız nasıl bir davranış ve sınıf ortamı belirlememiz gerektiğini bu konularda mes…	I am happy that I enjoyed taking this course. Our teacher increased our interest in the lesson. We participated every week with various questions. This course is a must-take course for a teacher candidate. Because it is possible to meet every student in the classroom environment. When we have students with ADHD, we learned how we should approach them, what kind of behavior and classroom environme…
3	3	3	3	3	3	3	3	3	3	3	3	3	3	3	3	Uzaktan eğitim olduğu için pek anlaşılır değildi	It was not very understandable because it was distance education.
4	4	4	4	4	4	4	4	4	4	4	4	4	4	4	4	her şeyiyle mükemmel bir hoca	He is an excellent teacher in everything.
4	4	4	4	4	4	4	4	4	4	4	4	4	4	4	4	Çok memnunum	I am very satisfied
4	4	4	4	4	4	4	4	4	4	4	4	4	4	4	4	Çok memnunum	I am very satisfied
4	4	4	4	4	4	4	4	4	4	4	4	4	4	4	4	keyifli bir dersti teşekkürler	It was an enjoyable lesson, thank you
3	3	3	3	3	3	3	3	3	3	3	3	3	3	3	3	Final sınavında işlenen içeriğe benzemeyecek derece zorlukta sorular soruldu.	Questions were asked that were of such difficulty that they did not resemble the content covered in the final exam.
4	4	4	4	4	4	4	4	4	4	4	4	4	4	4	4	canım hocam ??	dear teacher??
4	3	3	3	3	3	3	3	3	3	3	3	3	3	3	3	teşekkürler	thanks
4	4	4	4	4	4	4	4	4	4	4	4	4	4	4	4	Dönem çok verimli ve sorunsuz geçti. Sayın hocam iletişime çok açıktı ve bize her daim yardım etti. Kendisine teşekkür ediyorum.	The period was very productive and trouble-free. My dear teacher was very open to communication and always helped us. I thank him.
3	3	1	1	2	2	2	3	3	3	3	3	3	3	3	3	Bu dersin içeriğinin okuduğum bölümle alakasını anlayamadım. Gereksiz yere bu derste zorlanıldığımızı düşünüyorum. Kullandığımız uygulamaları kullanmakta zorlandım.	I couldn't understand the relevance of the content of this course to the department I was studying. I think we had a hard time in this course unnecessarily. I had difficulty using the applications we used.
4	4	4	4	4	4	4	4	4	4	4	4	4	4	4	4	Verilen ödevlerin sıklığının ve pratik yapmamızı sağlamasının bizi geliştirdiğini düşünüyorum.	I think the frequency of the homework given and the way it allows us to practice improves us.
3	3	3	3	3	3	3	2	2	3	3	3	3	3	3	3	Diğer alt sınıfların stüdyolarında çok daha yoğun kritik alma sürecimiz oluyordu.Hocaların verdiği kritiği not etmeye yetişemezdik.Bu sene ise bitirme projesi olmasına rağmen çoğu zaman hiç yorum yapılmadığı bile oldu.Olmuş denilip geçilmesi bana asla doğru gelmiyor,çoğu yönden proje iyi bile olsa piyasaya çok yakında adım atacak olan biz öğrencilere öğretilebilecek birçok şey olduğunu düşünüyoru…	In the studios of other lower grades, we had a much more intense process of taking criticism. We could not keep up with taking notes on the criticism given by the teachers. This year, although it was a graduation project, most of the time there was no comment at all. It does not seem right to say that it is done, even if the project is good in most respects, I think there are many things that can…
3	3	3	2	2	2	2	3	3	2	2	2	2	2	2	2	Bence bir dönemde 3 yazılım dili fazla ağır oluyor , onun yerine sadece MATLAB görsek çok daha iyi olur	I think 3 programming languages ​​at a time are too heavy, it would be much better if we only see MATLAB instead.
3	3	2	3	2	3	3	3	3	3	3	3	3	3	3	3	Bu dersten maalesef ki hiç birşey öğrenemedim. Sadece ezber yeteneğimizin ölçüldüğünü düşünüyorum. İnsanlar online sınavda iken kopya çekerek yüksek notlar alıp ben kendi emeğimle ortalama bir not aldığım için alacağım harf notu düşük olacak . Sorun harf notumdan çok emeğimin boşa gitmesidir. Keşke bunun için birşey yapabilseydiniz..	Unfortunately, I didn't learn anything from this lesson. I think only our ability to memorize is measured. Since people get high grades by cheating in the online exam and I get an average grade with my own effort, the letter grade I will receive will be low. The problem is that my effort is wasted rather than my letter grade. I wish you could do something about this...
1	1	1	1	1	1	1	1	1	1	1	1	1	1	1	1	Derslerde işlenen ya da anlatılan konulara hakimiyet çok azdı sorularımız çoğunlukla yanıtsız ya da farklı cevaplarla yanıt veriliyordu	Our knowledge of the topics covered or explained in the lessons was very low, and our questions were mostly answered with no answers or different answers.
3	4	3	3	3	3	3	3	3	3	3	3	3	3	3	3	Yok	None
4	4	4	4	4	4	4	4	4	4	4	4	4	4	4	4	Hocamızın dersi anlatış biçimi çok eğlenceliydi. Sınav yerine ödev vererek motivasyonumuzu arttırdı.Bu sayede hem merak ederek hem de eğlenerek öğrenmiş olduk.	The way our teacher taught the lesson was very entertaining. He increased our motivation by giving homework instead of exams. In this way, we learned by being curious and having fun.
4	4	4	4	4	4	4	4	4	4	4	4	4	4	4	4	ÇOK İYİ	VERY GOOD
3	3	4	4	3	3	2	4	4	4	4	4	4	4	4	4	Derste önemli kısımların daha çok vurgulanmasının ve mekanizmaların mantığında daha derine inilmesinin dersi daha anlaşılır yapacağını düşünüyorum	I think that emphasizing the important parts of the lesson and going deeper into the logic of the mechanisms will make the lesson more understandable.
4	4	4	4	4	4	4	4	4	4	4	4	4	4	4	4	EMEKLERİNİZE SAĞLIK.	GOOD LUCK TO YOUR EFFORTS.
2	2	2	2	2	2	1	2	3	2	2	2	2	2	2	2	ne faydalı ne faydasız bir ders	A lesson that is neither useful nor useless.
4	4	4	4	4	4	4	3	3	3	3	3	3	3	3	3	İs	Work
4	4	4	4	4	4	4	4	4	4	4	4	4	4	4	4	Hocama emeklerinden dolayı teşekkür ederim	I thank my teacher for his efforts.
4	4	4	4	4	3	4	4	4	4	4	4	4	4	4	4	lütfen ders programlarımızı hazırlarken bizi de düşünün ve alttan derslerimizi alabilelim.umarım bir sonraki yıl amfi sorunu ve öğretim görevlisi sorunu çözülür.	Please consider us while preparing our course schedules so that we can take our courses from below. I hope that the lecture hall problem and the lecturer problem will be solved next year.
4	4	4	4	4	4	4	4	4	4	4	4	4	4	4	4	Çok keyifli ve verimliydi	It was very enjoyable and productive
4	4	4	4	4	4	4	4	4	4	4	4	4	4	4	4	Dersin uzaktan ve kolay erişimli olması çok iyidi. Öğretmenimizin bizle olan ilgiside güzeldi. Ders hakkında bana kattığı şeyler gerçekten çok çok verimli. Ve eğelenceli bi süreçti.	It was very good that the course was remote and easily accessible. Our teacher's attention to us was also nice. The things he taught me about the course are really very productive. And it was a fun process.
4	4	4	4	4	4	4	4	4	4	4	4	4	4	4	4	Hocamızın herkese sunumlar yaptırması benim açımdan iyi oldu çünkü ben topluluk içinde konuşamıyordum, çok fazla heyecanlanıyorum bu sunumlar az da olsa bu durumu değiştirdi.	It was good for me that our teacher made presentations for everyone because I could not speak in public, I got very excited and these presentations changed this situation, even if only a little.
4	4	4	4	4	4	4	4	4	4	4	4	4	4	4	4	Hocamıza teşekkür ediyorum	I thank our teacher
4	4	4	4	4	4	4	4	4	4	4	4	4	4	4	4	Bir iletişimsizlik söz konusu değildi.	There was no miscommunication.
4	4	4	4	4	4	4	4	4	4	4	4	4	4	4	4	Cok memnun kaldım	I was very pleased
3	3	2	3	3	1	2	3	3	2	2	2	2	2	2	2	Hocamız dersi anlaşılabilir anlatmıyor ve gözlemlememe göre dersi tekrar alanlardan bazıları hariç herkes dersin gidişatını kaybediyor ve bu bizim öğrenmemizi, notlarımızı etkiliyor	Our teacher does not explain the course in an understandable way and according to my observation, everyone except some of those who retake the course loses the course of the course and this affects our learning and grades.
4	4	4	4	4	4	4	4	4	4	4	4	4	4	4	4	kakaowkwoqlqpqlqplqqplq	kakaowkwoqlqpqlqplqqplq
3	3	3	3	3	3	3	3	3	3	3	3	3	3	3	3	iyi.	Good.
4	4	3	3	4	2	3	3	4	4	4	4	4	4	4	4	bu dersten gayet memnundum öğretmenimde seviyorum.	I was very pleased with this course and I like my teacher too.
4	4	4	4	4	4	4	4	4	4	4	4	4	4	4	4	Hocam gerçekten çok iyisiniz ve çok güzel bir dönemdi iki ders içinde iyi ki siz girdiniz keşke herkes sizin gibi olsa canım öğretmenim	Teacher, you are really good and it was a very nice semester. I'm glad you got into two classes. I wish everyone was like you, my dear teacher.
3	3	4	4	4	3	3	4	4	4	4	4	4	4	4	4	Dersler anlaşılır güzeldi teşekkürler.	The lessons were clear and nice, thank you.
4	4	4	4	4	4	4	4	4	4	4	4	4	4	4	4	Keşke artık alana dair bir ders görüyor olsak 311 dersiyle çok paralel ve zaten bunların çoğuna hakimiz.	I wish we were taking a course on the field from now on, it is very parallel to the 311 course and we already know most of them.
3	4	4	4	3	2	3	3	4	2	2	2	2	2	2	2	Ders süresini çok etkili kullanamadığımız için readingler genellikle eve ödev kalıyordu.Speaking yok denecek kadar az yaptık. Derste genellikle aynı kişiye söz verildiği için hiç konuşamadım bu da derste aktif olamadığımdan uykum geliyordu. Genelde türkçe konuştuğumuz için yine ingilizce öğrenmem adına bir katkı sağlamadı.	Since we could not use the class time very effectively, reading was usually left for homework. We did almost no speaking. Since the floor was usually given to the same person during the lesson, I could not speak at all, which made me feel sleepy because I could not be active in the lesson. Since we mostly spoke Turkish, it did not contribute to my learning English.
4	4	4	4	4	4	4	4	4	4	4	4	4	4	4	4	Bana Matematiği sevdiren ve öğreten tek öğretmen...	The only teacher who made me love and teach Mathematics...
4	4	4	4	4	4	4	4	4	4	4	4	4	4	4	4	Bireysel ve grup çalışmalarımız oldu ve hepsi bizim için çok faydalıydı. Geziler oldu ve bu geziler bizler için projeyi daha iyi anlamamıza yardımcı oldu diye düşünüyorum.	We had individual and group studies and all of them were very useful for us. There were trips and I think these trips helped us understand the project better.
3	4	4	3	3	4	4	3	2	4	4	4	4	4	4	4	Genel olarak ders etkili ve öğreticiydi, teşekkürler.	Overall, the lesson was effective and instructive, thank you.
1	1	1	1	1	1	1	1	1	1	1	1	1	1	1	1	Orta	Middle
4	4	4	4	4	4	4	4	4	3	3	3	3	3	3	3	Çalışanın yapabileceği, çalışmayanın yapamayacağı bir ders. Çalışmadım ve -muhtemelen- yapamadım.	A lesson that those who work can do, but those who do not cannot. I didn't study and -probably- couldn't do it.
3	3	3	3	3	3	3	3	3	3	3	3	3	3	3	3	İyi	Good
4	4	4	4	4	4	4	4	4	4	4	4	4	4	4	4	Bu dönem aldığım dersler arasında hem en verim aldığım hem de en keyif aldığım derslerden biri oldu. Makine Mühendisliği okuyor olmama rağmen bana sunulan imkan vesilesiyle Elektrik Elektronik Mühendisliği'ne ait olan bu dersi almam neticesinde, özellikle yazılım ve programlama alanında kendime çok şey kattığımı hissediyorum. Bunun en büyük aracısı olan öğretim görevlimize ve bu dersi tüm uygulam…	Among the courses I took this semester, it was one of the courses that I was both most productive and enjoyed the most. Even though I am studying Mechanical Engineering, I feel that I have added a lot to myself, especially in the field of software and programming, as a result of taking this course in Electrical and Electronics Engineering, thanks to the opportunity offered to me. I would like to …
4	4	4	4	4	4	4	4	4	4	4	4	4	4	4	4	Hoca ve ders harika	The teacher and the course are great
2	4	4	4	4	1	1	4	4	1	1	1	1	1	1	1	öğretim görevlisinin çok seri bir şekilde ders anlatma çabası konuları anlamamamızı güçleştirmiştir	The lecturer's effort to explain the lesson very quickly made it difficult for us to understand the topics.
4	4	4	4	4	4	4	4	4	4	4	4	4	4	4	4	Grup ödevlerimizden öğrendiğim çok şey oldu, dersle ilgili çok güzel şeyler öğrendik, her şey için çok teşekkür ederim.	I learned a lot from our group assignments, we learned a lot of good things about the course, thank you very much for everything.
3	3	3	3	3	3	3	3	3	3	3	3	3	3	3	3	sınavları aşırı zor maalesef çok fazla konu var hepsi birbirine karışıyor bu kadar az zamanda bu kadar fazla konu işlenmesi bence çok zayıf yönü Sınavlar daha kolay sorulmalı	The exams are extremely difficult, unfortunately, there are too many subjects, they all get mixed up, so many subjects are covered in such a short time, I think the weakness is that the exams should be asked more easily.
4	4	4	4	4	4	4	4	4	4	4	4	4	4	4	4	Harikaydı ??	Was it great??
4	4	4	4	4	4	4	4	4	4	4	4	4	4	4	4	teşekkürler	thanks
4	3	3	2	3	4	3	3	4	2	2	2	2	2	2	2	I like the general concept of this class but the source text was unsuitable at best, at least for the purpose of the class. The chapters took too long to read only to reveal trivial information -which everyone already knew- or unnecessarily detailed historical facts -which no one could remember 5 minutes after reading- so the retention rate of the chapters was infinitesimal. More of an academical…	I like the general concept of this class but the source text was unsuitable at best, at least for the purpose of the class. The chapters took too long to read only to reveal trivial information -which everyone already knew- or unnecessarily detailed historical facts -which no one could remember 5 minutes after reading- so the retention rate of the chapters was infinitesimal. More of an academical…
2	2	2	1	2	1	2	1	2	1	1	1	1	1	1	1	Hocamız ders esnasında çok hızlı konuşuyor ve dediklerini anlamakta zorlanıyorum. Derslerde konuşma hızını yavaşlatmalı.	Our teacher speaks very fast during the lesson and I have difficulty understanding what he says. He/she should slow down his/her speaking pace during classes.
4	4	4	4	4	4	4	4	4	4	4	4	4	4	4	4	Ders oldukça verimli geçti.	The lesson was very productive.
4	4	4	4	4	4	4	4	4	4	4	4	4	4	4	4	Ders oldukça verimli geçti.	The lesson was very productive.
4	4	4	4	4	4	4	4	4	4	4	4	4	4	4	4	Çok verimli ve keyifli bir ders süreciydi çok teşekkür ederim	It was a very productive and enjoyable course, thank you very much.
4	4	4	4	4	4	4	4	4	4	4	4	4	4	4	4	Hocamızı çok seven ve saygı duyan bir öğrenci olarak belirtmek isterim ki dersi ikinci kere alıyorum. Çoğu arkadaşımın ve benim okulu uzatmamızdaki tek neden yöneylem dersinin zorluğu. Bu dersin elle hesaplamadan çok çıktılar ve paket programlar kullanılarak daha verimli olacağı düşüncesindeyim.	As a student who loves and respects our teacher very much, I would like to say that this is the second time I am taking the course. The only reason why most of my friends and I have to take longer to study is the difficulty of the operations course. I think that this course will be more efficient by using printouts and package programs rather than manual calculations.
4	4	4	4	4	4	4	4	4	4	4	4	4	4	4	4	Başta derse karşı ön yargılı olsamda dönem içinde bana güzel bilgiler kattı.	Even though I was prejudiced against the course at first, it gave me good information during the semester.
4	4	4	4	4	4	4	4	4	4	4	4	4	4	4	4	Dersin içeriği ve işleyişi hocanın anlatımı çok iyi fakat kitabı okurken bazı bölümleri anlamadım.	The instructor's explanation of the content and process of the course is very good, but while reading the book, I did not understand some parts.
3	4	3	3	2	4	4	4	4	4	4	4	4	4	4	4	iyi	Good
1	2	3	3	3	3	3	3	2	4	4	4	4	4	4	4	canlı derslerde en çok zorlandığım ders çünkü ders bazen oluyor bazen olmuyordu haberimiz de olmuyordu. devamsızlık hakkım ne kadar kaldı bilmiyorum bile. hocaya ulaşmada da sorun yaşadım.	I had the most difficulty in live lessons because sometimes the lesson was happening, sometimes it wasn't, and we didn't know about it. I don't even know how long my absence right is left. I also had problems reaching the teacher.
3	4	4	4	4	4	4	4	3	4	4	4	4	4	4	4	Online ödevlendirme platformunda yaşanan sistemsel sorunlar nedeniyle eksik ve hatalı sonuçlar veriyor.	Due to the systemic problems experienced in the online assignment platform, it gives incomplete and erroneous results.
4	4	4	4	4	4	4	4	4	4	4	4	4	4	4	4	Hocamız gayet güzel ders anlattı.	Our teacher taught very well.
4	4	4	4	4	4	4	4	4	4	4	4	4	4	4	4	Önerim yok.	I have no suggestions.
4	4	4	4	4	4	4	4	4	4	4	4	4	4	4	4	Dersimizin hocası slaytlar eşliğinde anlatımını gerçekleştirdi. Konulara kapsamlı şekilde hakim olmamızı sağladı.	The teacher of our course gave his explanation accompanied by slides. It enabled us to have a comprehensive understanding of the subjects.
4	4	4	4	4	4	4	4	4	4	4	4	4	4	4	4	Hocamızın bize kattıkları için çok teşekkür ediyorum.	I would like to thank our teacher very much for what he contributed to us.
2	2	2	1	1	1	1	1	2	3	3	3	3	3	3	3	Atatürk?ün bile haberi olmadığı insanların ismini soracak kadar detay vize soruları kadar absürt bir şey görmedim. Özellikle de yalnızca iki kredilik bir dersin bu kadar zorlama yapılması ayrı tuhaf. Tamam, dönemdeki bozulmalardan kaynaklanan endişenizi anlayabiliyorum, Atatürk?ü unutturmak istemiyorsunuz, kimse istemiyor zaten. Ama dersi böyle zorlaştırarak insanları kendi tarihlerinden soğutmak…	I have never seen anything as absurd as visa questions that are so detailed that they ask the names of people that even Ataturk does not know about. It is especially strange that a course of only two credits is made so difficult. Okay, I can understand your concern about the distortions in the period, you do not want to make Atatürk forgotten, no one does anyway. But by making the course difficul…
4	4	4	4	4	4	4	4	4	4	4	4	4	4	4	4	Bölümde çok sevdiğim hocalardan biri umarım ikinci dönem tekrar ders alabilirim sizden	He is one of my favorite professors in the department. I hope I can take lessons from you again in the second semester.
4	4	4	4	4	4	4	4	4	4	4	4	4	4	4	4	Benim için zor olan bir dersi tecrübeleriyle ve bilgileriyle bize sabırla ve özenle aktardığı için kendi adıma hocama teşekkür ediyorum.	On my own behalf, I would like to thank my teacher for patiently and carefully teaching us a lesson that was difficult for me, with his experience and knowledge.
4	4	4	4	4	4	4	4	4	4	4	4	4	4	4	4	Mükemmel bir ders, mükemmel bir hoca	Excellent lesson, excellent teacher
4	4	4	4	4	4	4	4	4	4	4	4	4	4	4	4	güzel bir dersti teşekkür ederim.	It was a good lesson, thank you.
4	4	4	4	4	4	4	4	4	4	4	4	4	4	4	4	Bu dersin içeriği, kullanılan materyallerle ve öğretim elemanının anlatımıyla uyumluydu	The content of this course was compatible with the materials used and the instructor's explanation.
4	4	4	4	4	4	4	4	4	4	4	4	4	4	4	4	Mxl ozlzos	Mxl ozlzos
1	1	1	1	1	1	1	1	1	1	1	1	1	1	1	1	İyi	Good
2	2	2	2	2	2	2	2	2	2	2	2	2	2	2	2	öğretmene okul olarak kendi sisteminizin nasıl olduğunu anlatmanız gerektiğini düşünüyorum. zira okulun sistemini bilen bir öğretmen düzenli olarak öğrenciye okul sistemiyle alakalı sorular sormaz.	I think you should explain to the teacher what your own system is like as a school. Because a teacher who knows the school system does not regularly ask the student questions about the school system.
4	4	4	4	4	4	1	4	4	4	4	4	4	4	4	4	Hocanın bize karşı takındığı tavır daha iyi olabilirdi.	The teacher's attitude towards us could have been better.
3	3	3	3	3	3	3	3	2	2	2	2	2	2	2	2	Öğretim görevlisi dersi ilk defa veriyordu o yüzden tecribesizdi ama yine de elinden geleni yaptı	The lecturer was teaching the course for the first time, so he was inexperienced, but he still did his best.
4	4	4	4	4	4	4	4	4	4	4	4	4	4	4	4	Her şey güzeldi.	Everything was beautiful.
3	3	3	3	3	3	3	3	3	3	3	3	3	3	3	3	Her şey güzeldi.	Everything was beautiful.
4	4	4	4	4	4	4	4	4	4	4	4	4	4	4	4	Dönemin en zorlayıcı derslerinden biri oldu. Hem dersimizin öğretim elemanı hem de yardımcı öğretmen elemanları derse katılımımda yardımcı oldular. Ders içerikleri çok iyi bir şekilde anlatıldı.	It was one of the most challenging courses of the semester. Both the instructor of our course and the assistant teachers helped me participate in the course. Course contents were explained very well.
4	4	4	4	4	4	4	4	4	4	4	4	4	4	4	4	Ders yüz yüze de verilebilir . Aynı sınıf içerisinden uzaktan eğitimde sağlanabilir .	The course can also be given face to face. Distance education can also be provided within the same classroom.
4	4	4	4	4	4	4	4	4	4	4	4	4	4	4	4	Teşekkür ederim	Thank you
2	2	2	2	2	2	1	1	1	1	1	1	1	1	1	1	Staj raporlarımız farklı hocalar tarafından okundu. Benzer staj raporu yazanlar arasında ciddi not farkları vardı. Staj raporumu görmek için gittiğimde sürekli belirsiz cevaplar verildi ve geçiştirildim. Staj raporunun yazımı konusunda yeterli bilgilendirme yapılmadı. TİTCKnın sayfasından kopyala yapıştır yapanlar tam not alırken uğraşıp maddelere cevap yazanlar çok düşük aldılar.	Our internship reports were read by different professors. There were serious grade differences between those who wrote similar internship reports. When I went to see my internship report, I was constantly given vague answers and ignored. There was not enough information about writing the internship report. Those who copied and pasted from TITCK's page received full marks, while those who bothered…
3	1	3	2	2	1	3	3	3	3	3	3	3	3	3	3	Yüz yüze işlenen bu derste işlenen dersin hoca tarafından yazdığı yazıyı anlamak ve yetişmek mümkün olmuyor arka sıradaysanız görmek imkansız olabiliyor. Sınavlarda ise ders içeriği degil bazen geçmiş senelerin bilgileri sorgulanıyor. Bununla birlikte hoca kullandığı dil itibari ile destekleyici değil dersi gecebilmemizle yeterliligimizle ilgili motive kırıcı bir tavır sergileyebiliyor. Bu ders i…	In this face-to-face course, it is not possible to understand and keep up with the text written by the instructor, and it may be impossible to see it if you are in the back row. In exams, sometimes the knowledge of previous years is questioned, not the course content. However, due to the language he uses, the teacher may not be supportive, but may have a demotivating attitude regarding our abilit…
4	4	4	4	4	4	4	3	4	4	4	4	4	4	4	4	Hocamız çok tatlı ve anlayışlı onu çok seviyoruz. Derste güzel geçiyordu	Our teacher is very sweet and understanding, we love him very much. The lesson was going well
3	3	3	3	3	3	3	3	3	3	3	3	3	3	3	3	Uzaktan eğitim pek yeterli olmasada güzel dersler işlendi	Although distance education was not sufficient, good lessons were taught.
3	3	3	2	1	1	2	3	2	3	3	3	3	3	3	3	Öğretim elamının ders boyunca kullandığı dil ve ders notları hiç anlaşılır değildi. Ders notlarının içinde birbiriyle çelişen ve yanlış olan ifadeler vardı. Dersin ve bölümün eğitim dili türkçe olmasına rağmen slaytların çoğunluğunda, ifadelerin çoğunluğunda ingilizce kullanıyordu, türkçe olan kısımlarda da anlatım bozuklukları vardı ve slaytların dil bakımından böyle karışık olması öğrenmeyi güç…	The language used by the instructor throughout the course and the lecture notes were not understandable at all. There were contradictory and incorrect statements in the lecture notes. Although the language of instruction of the course and department was Turkish, English was used in the majority of the slides and most of the expressions, there were expression errors in the Turkish parts, and the l…
4	4	4	4	4	4	4	4	4	4	4	4	4	4	4	4	GAYET YETERLİ VE GÜZEL BİR EĞİTİMDİ TEŞEKKÜR EDERİM.	IT WAS A VERY SUFFICIENT AND GOOD EDUCATION, THANK YOU.
4	4	4	4	4	4	4	4	4	4	4	4	4	4	4	4	Güzel ve keyifli bir dersti teşekkürler	It was a nice and enjoyable lesson, thank you.
3	3	3	3	3	3	3	3	3	3	3	3	3	3	3	3	Ders için kullanılan nsls platformu çok başarısızdı	The nsls platform used for the course was very unsuccessful
4	4	4	4	4	4	4	4	4	4	4	4	4	4	4	4	Hocam efsaneydi :)	My teacher was legendary :)
3	3	3	3	3	3	3	3	3	3	3	3	3	3	3	3	Tüm yönlendirmeleri ve desteği için hocamıza teşekkür ederim.	I would like to thank our teacher for all his guidance and support.
3	3	3	3	3	3	3	3	3	3	3	3	3	3	3	3	Ofggg	Ofgggg
4	4	4	4	4	4	4	4	4	4	4	4	4	4	4	4	k	k
2	2	2	2	2	2	2	2	2	2	2	2	2	2	2	2	Bazı haftalarda öğrenci sunumu birikmesi sunum yapan kişileri olumsuz etkiledi	A backlog of student presentations negatively affected presenters in some weeks
4	4	4	4	4	4	4	4	4	4	4	4	4	4	4	4	Ders işlenişi gayet yeterliydi	The course delivery was quite adequate.
4	4	4	4	4	4	4	4	4	4	4	4	4	4	4	4	OLUMLU	POSITIVE
2	2	2	2	2	2	2	2	2	2	2	2	2	2	2	2	Üzülerek söylemeliyim ki benim için en verimsiz ders buydu. Dersin iki hocası olmasından dolayı hanginize bir şey sorsak farklı cevaplar aldık. Birbirinizden haberiniz yoktu. Ders hakkında genel bilgilendirme yapılmadı. Ödev bilgilendirmesi 5. hafta yapıldı. Her hafta başka derslerimiz yokmuş gibi son haftaya kadar ödevler verildi. sınav haftası da buna dahildi ve diğer derslere yeteri kadar baka…	I regret to say that this was the least productive lesson for me. Since the course had two instructors, we received different answers whenever we asked each of you a question. You didn't know about each other. No general information was given about the course. Homework information was given in the 5th week. Homework was given every week until the last week, as if we had no other classes. Exam wee…
4	4	4	4	4	4	4	4	4	4	4	4	4	4	4	4	Dersin işlenişi ve anlaşılırlığı açısından hiç sorun yaşamadım hocam. Çok verimli bir dersti. Her şey için teşekkür ederim hocam.	Sir, I had no problems in terms of the teaching and understandability of the course. It was a very productive lesson. Thank you for everything, sir.
4	4	4	4	4	4	4	4	4	4	4	4	4	4	4	4	Krwm	krwm
3	3	3	3	3	3	3	3	3	3	3	3	3	3	3	3	Her şey iyiydi	everything was fine
4	4	4	4	4	4	4	4	4	4	4	4	4	4	4	4	her şey için teşekkürler hocam	thank you for everything sir
3	3	3	3	3	3	3	3	3	3	3	3	3	3	3	3	Yanlış yapmak başlı başına kişiye verilen bir cezadır. Yanlışlar doğruları götürünce cezanın üstünden bir ceza daha verilmektedir. Bu anlayış ceza hukukunda da öğrendiğimiz aynı suçtan 2 kere cezalandırılma anlayışına ters düşmektedir. . Sınavı sallayacak olan insan da kendinden sorumludur. Burada çalışan öğrencilere haksızlık olmaktadır. Yanlışların doğruları götürmesi sisteminin kaldırılmasını …	Making a mistake is a punishment in itself. When wrongs take away the right ones, another punishment is given on top of the punishment. This understanding is contrary to the understanding of being punished twice for the same crime, which we learned in criminal law. . The person who will fail the exam is also responsible for himself. It is unfair to the students working here. I wish that the syste…
2	2	2	2	2	2	2	2	2	2	2	2	2	2	2	2	dersin online olup sınavların yüz yüze olması çok kötü.	It's too bad that the course is online and the exams are face to face.
3	4	4	3	2	3	2	4	4	4	4	4	4	4	4	4	Ders zor bir ders ama soru üzerinden anlatım dersi anlamaya pek yardımcı olmuyor sadece soruyu nasıl çözeceğimize dair fikir veriyor. Dersin içeriği azaltılsa ve daha detaylı öğrenmeye vaktimiz olsa çok daha verimli olurdu.	The course is a difficult one, but explanation through questions does not help us understand the lesson, it only gives us an idea on how to solve the question. It would be much more productive if the content of the course was reduced and we had time to learn in more detail.
3	3	3	3	3	3	3	3	3	3	3	3	3	3	3	3	biraz zorlansam da yeterli ve eğiticiydi	Even though I had a little difficulty, it was sufficient and educational.
4	4	4	4	4	4	4	4	4	4	4	4	4	4	4	4	Olumlu	Positive
3	3	3	3	3	3	3	3	3	3	3	3	3	3	3	3	Güzeldi	it was nice
4	4	4	4	4	4	4	4	4	4	4	4	4	4	4	4	Dersi veren hocam hakkında pek bir görüşüm yoktu dönem başında, ama kendisini tanıdıkça ve dersleri işlemeye devam ettikçe kendini eğitime adamış, son derece idealist bir hocamla karşılaştım.	At the beginning of the semester, I didn't have much of an opinion about the teacher who taught the course, but as I got to know him and continued to teach the lessons, I came across a very idealistic teacher who was devoted to education.
3	3	3	3	3	3	3	3	3	3	3	3	3	3	3	3	OLUMLU	POSITIVE
4	4	4	4	4	4	4	4	4	4	4	4	4	4	4	4	guxel	guxel
4	4	4	4	4	4	4	4	4	4	4	4	4	4	4	4	iyiydi	it was good
2	2	1	1	1	1	1	1	1	1	1	1	1	1	1	1	Hocamızdan son derece şikayetçiyim derse geç gelmelerden ve verimsiz ilerlemelere kadar çok vaktimizi aldı	I have a huge complaint about our teacher, he took up a lot of our time, from coming to class late to making inefficient progress.
1	1	1	1	1	1	1	1	1	1	1	1	1	1	1	1	Nasıl hoca olduğundan şüphe duyduğum, anlattığı hiçbir şey anlaşılamayan ve öğrencilerle iletişimi 0 olan, ulaşılması zor , ders anlatım konusunda da ingilizceyi hiç etkili kullanamaması dersi anlayamamamıza neden oldu.	I have doubts about what kind of a teacher he is, he cannot understand anything he teaches, he has zero communication with the students, he is difficult to reach, and he cannot use English effectively in lectures, which caused us not to understand the course.
4	3	3	3	3	4	4	3	4	4	4	4	4	4	4	4	mükemmel	Perfect
3	3	3	3	3	3	3	3	3	3	3	3	3	3	3	3	Her şeyi normal olması gerektiği gibi olan bir ders	A lesson where everything is normal, as it should be
4	4	4	4	4	4	4	4	4	4	4	4	4	4	4	4	Öğretmenimize çok teşekkür ediyorum, gerçekten bizlere bir şeyler kattığı için.	I would like to thank our teacher very much, for really adding something to us.
4	4	4	4	4	4	4	4	4	4	4	4	4	4	4	4	Vize sınavında sorulan soru sayısı niteliği ölçmedi onun dışında verimli bir ders ve dönem geçirdim	The number of questions asked in the midterm exam did not measure quality, other than that, I had a productive course and semester.
4	4	4	4	4	4	4	4	4	4	4	4	4	4	4	4	Her şey için teşekkür ederim	thank you for everything
4	4	4	4	4	4	4	4	4	4	4	4	4	4	4	4	Yararlı bir dersti	It was a useful lesson
4	4	4	4	4	4	4	4	4	4	4	4	4	4	4	4	1. sınıftan itibaren üzerimde çok büyük emekleri var. Dersi anlatma şekli çok kolay ve anlaşılır. Emeklerinden dolayı teşekkür ederim.	They have made great efforts on me since the first grade. The way he explains the lesson is very easy and understandable. Thank you for your efforts.
2	2	2	2	2	2	2	2	2	2	2	2	2	2	2	2	hocamız çok yaşlı ve doğal olarak hastalandığında iyileşme süreci daha uzun oluyor. çok geçmiş olsun fakat bu bizim ders izlencemizi etkiliyor. derslere gelemediği için ek zoom dersleri yaptı ve normalde işlemesi gerekenden çok daha fazla konu bitirdi. geçmiş yıllara bakıldığında konu olarak birinci dönemde bitirmemiz gereken yeri bitirdik ve üstüne ek olarak ikinci kitaba geçtik. bu bizim sınavl…	Our teacher is very old and naturally, when he gets sick, the recovery process takes longer. I hope you get well soon, but this affects our syllabus. Since he couldn't come to classes, he took additional zoom classes and completed much more topics than he normally should. Looking at the past years, we finished what we needed to finish in the first semester and then moved on to the second book. Th…
4	4	4	4	4	4	4	4	4	4	4	4	4	4	4	4	dersin işlenişini yeterli buluyorum.	I find the teaching of the course sufficient.
3	3	3	3	3	3	3	3	3	2	2	2	2	2	2	2	Ders dışı soru soramamamız kötüydü	It was too bad that we couldn't ask questions outside of class.
4	4	4	4	4	4	4	4	4	4	4	4	4	4	4	4	Üniversitemizi tanimamiz icin guzel bir dersti.	It was a good lesson for us to get to know our university.
2	2	2	2	2	2	2	2	2	2	2	2	2	2	2	2	Hocamiz yine yasca cok buyuk, dersi anlasilir anlatamiyor. Artik istirahate cekilmenin kendisine iyi gelecegini dusunuyorum. Ustelik devam zorunlulugu olmayan bir fakultede, donem içerisinde tamamen rastgele 2-3 yoklama almak ve buna gore bir puan vermek ne kadar mantikli sorgulanir. Bunlarin yani sira, dersi o kadar hizli isliyor ki, ben kitapta soylenen bir cumleyi cizene kadar 3 sayfa ileri gi…	Our teacher is also very old and cannot explain the lesson clearly. I think it would be good for him to rest now. Moreover, in a faculty where attendance is not compulsory, it is questioned how logical it is to take 2-3 completely random examinations during the semester and give a score accordingly. In addition to these, he completes the lesson so quickly that he goes 3 pages forward until I draw…
4	4	4	4	4	4	4	4	4	4	4	4	4	4	4	4	İyi	Good
4	4	4	4	4	4	4	4	4	4	4	4	4	4	4	4	Proje yönetimi dersi sayesinde ileride kendimi geliştirmek istediğim alan hakkında az çok fikrim oluştu. Sadece sınav soru stili yeterince anlaşılır olamayabiliyor.	Thanks to the project management course, I had a little idea about the area in which I would like to improve myself in the future. However, the exam question style may not be clear enough.
2	2	2	2	2	2	2	2	2	2	2	2	2	2	2	2	İlgisiz	Irrelevant
3	3	3	3	3	3	3	3	3	3	3	3	3	3	3	3	hocamız derse ve biz öğrencilere karşı çok ilgiliydi. çok güzel bir ders işleyiş şekli vardı.	Our teacher was very interested in the lesson and us students. He had a very nice way of teaching.
4	4	4	4	4	4	4	4	4	4	4	4	4	4	4	4	Hocalarımız bizimle çok ilgilendi genel anlamda iyiydi ellerine sağlık	Our teachers took great care of us and were generally good, thank you.
3	2	4	3	3	3	3	3	3	3	3	3	3	3	3	3	Dersin işlenişi sırasında ilk zamanlarda öğretim üyesi neyi nasıl yapmamız gerektiği ile ilgili bize fikir veriyor yol gösteriyordu. Daha sonra konular zorlaştıkça bu durum azaldı ve sadece öğrenciler olarak bir şeyler yaparken doğru yolda mıyız değil miyiz ya da bir hata olduğunda onu sorabiliyorduk. İlerleyen haftalarda öğretim üyesinin ders başlangıcında fikir verip yol göstermesi bu ders açıs…	At the beginning of the course, the instructor was giving us ideas and guidance on what to do and how to do it. Later, as the subjects became more difficult, this situation decreased and we could only ask as students whether we were on the right track while doing something or if there was a mistake. It may be better for this course if the instructor gives ideas and guidance at the beginning of th…
4	4	4	4	4	4	4	4	4	4	4	4	4	4	4	4	Emeğiniz için teşekkür ederim ?	Thank you for your effort.
1	1	1	1	1	1	1	1	1	1	1	1	1	1	1	1	Bu dersin zorluk seviyesi sebebiyle bölüm öğrencileri mağduriyet yaşamaktadır. Öğretim elemanının öğrencilere karşı aşağılayıcı ve kırıcı üslup kullanması , biz öğrencilerin dersten uzaklaşmasına ve soğumasına sebep olmaktadır. Ders içerisinde ve sınavlarda kullanılan dil biz öğrencilere çok ağır gelmektedir. Bu sebeple sınavların test olması bizim için büyük bir dezavantajdır. Bu ders çok önemli…	Due to the difficulty level of this course, students of the department experience disadvantage. When the instructor uses a derogatory and hurtful tone towards the students, it causes us students to distance themselves from the course and become alienated. The language used in classes and exams is very difficult for us students. For this reason, having exams as tests is a big disadvantage for us. …
4	4	4	4	4	4	4	4	4	4	4	4	4	4	4	4	Ders linklerinin oys sayfası üzerinde paylaşılması sonucunda sistemin teknik sebeplerden çökmesi yüzünden birkaç dersimi kaçırdım bu problem dışında her şey çok iyiydi.	I missed a few classes due to the system crashing due to technical reasons as a result of sharing the course links on the oys page. Apart from this problem, everything was very good.
2	3	3	3	3	2	2	1	1	1	1	1	1	1	1	1	Ders hocamızın ders izlencesiyle alakalı sorulan sorulara ters ve fevri cevapları olmuştur.	Our lecturer had rude and impulsive answers to questions about the course syllabus.
1	1	1	1	1	1	1	1	1	1	1	1	1	1	1	1	Hocanın değişmesi gerekiyor.	The teacher needs to change.
4	4	2	3	4	4	3	4	4	1	1	1	1	1	1	1	E-ticaret dersinde öğrenmemiz gereken şeyler ürünlerin nasıl seçileceği, o ürünün e ticaret platformlarına nasıl konulup satışının yapılacağı olmalıyken, dönem başından sonuna kadar sadece e ticaret hakkında şu an bile hatırlamadığım e ticaret mevzuat bilgilerini ezberleyip dersten kendime hiçbir şey katamadan geçtiğimi düşünüyorum. Gelecek nesil için dersin içeriğininin değiştirilmesini önemle r…	While the things we need to learn in the e-commerce course should be how to choose products, how to put that product on e-commerce platforms and sell it, I think that from the beginning to the end of the semester, I only memorized e-commerce legislation information about e-commerce, which I do not even remember, and passed the course without adding anything to myself. I strongly request that the …
4	4	4	4	4	4	4	4	4	4	4	4	4	4	4	4	Verimli bir dersti	It was a productive lesson
4	4	3	4	4	4	4	4	4	4	4	4	4	4	4	4	Bu dersin 2023 güz dönemi itibariyle müfredatında değişiklik olduğu için bazı aksaklıklar olduğunu düşünüyorum. Bence TOEFL konularının çok kapsamlı ve detaylı olarak bir dönem içerisinde öğretilmesi mümkün değil. Bunun yerine iki farklı döneme ayrılmış bir ders açılabilirdi.	I think there are some disruptions because there has been a change in the curriculum of this course as of the 2023 fall semester. In my opinion, it is not possible to teach TOEFL subjects comprehensively and in detail in one semester. Instead, a course divided into two different periods could have been opened.
4	4	4	4	4	4	4	4	4	4	4	4	4	4	4	4	HER ŞEY İÇİN TEŞEKKÜR EDERİZ HOCAM...	THANK YOU FOR EVERYTHING, MASTER...
3	3	3	3	3	3	3	3	3	3	3	3	3	3	3	3	iyi	Good
4	4	4	4	4	3	4	4	4	3	3	3	3	3	3	3	Ders benim için güzel geçti.	The lesson went well for me.
4	4	4	4	4	4	4	4	4	4	4	4	4	4	4	4	Derste gerçekten zorlandım.	I had a really hard time in class.
4	4	4	4	4	4	4	4	4	4	4	4	4	4	4	4	gayet iyiydi teşekkür ederim	it was fine thank you
4	4	4	4	4	4	4	4	4	4	4	4	4	4	4	4	hoca gayet verimliydi her sey guzeldi hiçbir problem yoktu	The teacher was very efficient, everything was fine, there were no problems.
4	4	4	4	4	4	4	4	4	4	4	4	4	4	4	4	Teşekkürler	Thanks
4	4	4	4	4	4	4	4	4	4	4	4	4	4	4	4	Hocamız çok iyi derslerimiz güzel geçtİ.	Our teacher is very good, our lessons went well.
3	3	3	3	3	3	3	3	3	3	3	3	3	3	3	3	Yok	None
3	3	3	3	3	3	3	3	3	3	3	3	3	3	3	3	A	A.
2	2	2	2	2	2	2	2	2	2	2	2	2	2	2	2	Herşey çok güzeldi	Everything was beautiful
3	3	4	4	4	3	4	4	4	4	4	4	4	4	4	4	bazı derslerin iptal edilmesi ve tekrar telafi dersi yapılmaması hoş değildi. Genel olarak dersler keyifli geçti. Vize sınavının yapılmaması ödev vereceğim yerine diyip verilmemesi sadece final sınavının yapılması hoş değildi	It was unpleasant that some courses were canceled and no make-up lessons were held again. Overall, the lessons were enjoyable. It was not nice that the midterm exam was not held, instead of saying "I will give homework" and only the final exam was given.
4	4	4	4	4	4	4	4	4	4	4	4	4	4	4	4	Yok	None
1	1	1	3	2	1	1	3	3	1	1	1	1	1	1	1	Dersin öğretim elemanının dersi anlatırken söylediği şeyler ve kullandığı dil anlaşılmıyor. Dersi verimli anlatamıyor. Sınavlar okunduktan sonra sınav kağıtlarımızı incelemeye gittiğimizde bize karşı kullandığı üslup ve tavırlar hiç hoş değildi.	The things the instructor says and the language he uses while teaching the course cannot be understood. He cannot explain the lesson effectively. When we went to examine our exam papers after the exams were read, the tone and attitude he used towards us was not nice at all.
4	3	3	4	4	3	4	3	4	3	3	3	3	3	3	3	Hocamızın öğrencilerle iletişimi ve geri dönüşleriyle bize eksiklerimizi göstermesi gayet iyi. Dersin işlenişiyle ilgili bence eksik olan şey uygulamalı gösterim.Mesela kamera hareketlerinin ve kameranın kullanımı derste bize bire bir gösterilebilir.	It is very good that our teacher communicates with the students and shows us our shortcomings through their feedback. I think what is missing in the course is practical demonstration. For example, camera movements and the use of the camera can be shown to us one-on-one in the course.
2	2	2	2	2	2	2	2	2	2	2	2	2	2	2	2	Yabancı diller öğrencileri her zaman zorlayıp zor duruma sokuyor ve bu huylarından vazgeçmiyor. Bir şeylerin değişmesi gerekiyor her bölümde yabancı diller sıkıntısı çıkıyor	Foreign languages ​​always put students in a difficult situation and they do not give up this habit. Something needs to change. There is a shortage of foreign languages ​​in every department.
2	2	2	2	2	2	2	2	2	2	2	2	2	2	2	2	FİKRİM YOK	I HAVE NO IDEA
3	3	2	3	3	3	2	3	3	2	2	2	2	2	2	2	Dersin öğretim elemananlarının ayrımcılık yaptığını ve herkese eşit bir şekilde yaklaşmadığını ve bu sorunu dile getirdiğimizde de kendi notlarımızdan olmamız gerçekten dersten soğutan olaylardı. Sırf ağladığı için yüksek puan verilen öğrencilerden tutun da kişisel eleştiriler, tutulan öğrencilere saatlerce kritik verilerek adaletsiz davranış sergilemek, özellikle kendi adıma alamadığım kritik sa…	We were told that the instructors of the course discriminated and did not treat everyone equally, and that when we voiced this problem, it was our own grades that really detracted from the course. There were problems such as personal criticism from students who were given high scores just because they cried, unfair behavior by giving hours of criticism to detained students, and not even seeing th…
4	4	4	4	4	4	4	4	4	4	4	4	4	4	4	4	Gayet başarılı bir anlatımı olan hocamız var	We have a teacher who has a very successful explanation.
4	4	4	4	4	4	4	4	4	4	4	4	4	4	4	4	a	a
4	4	4	4	4	4	4	4	4	4	4	4	4	4	4	4	Bu ders her şeyiyle çok iyiydi. Öğretim görevlisinin ilgi ve alakası, verdiği enerji, anlatma isteği ve anlattığı bilgileri karşıdakilere aksettirebilme yeteneği çok güzel.	This course was very good in everything. The interest and concern of the lecturer, the energy he gives, his desire to explain and his ability to convey the information he explains to others are very nice.
4	4	4	4	4	4	4	4	4	4	4	4	4	4	4	4	Laboratuvar dersleri de olursa güzel olur	It would be nice if there were laboratory classes as well.
4	4	4	4	4	4	3	4	4	4	4	4	4	4	4	4	İyi	Good
3	3	3	3	3	3	3	3	3	3	3	3	3	3	3	3	Yok	None
4	4	4	4	4	4	4	4	4	4	4	4	4	4	4	4	Hocamız çok anlaşılır anlatıyordu ama uzaktan eğitim bu ders için biraz zordu.	Our teacher was explaining very clearly, but distance education was a little difficult for this course.
4	4	4	4	4	4	4	4	4	4	4	4	4	4	4	4	İyi	Good
4	4	4	4	4	4	4	4	4	4	4	4	4	4	4	4	Hocama teşekkür ediyorum.	I thank my teacher.
4	4	3	4	3	4	4	4	4	3	3	3	3	3	3	3	Hocamız konuyu çok güzel ve akıcı bir şekilde anlattı.	Our teacher explained the subject very nicely and fluently.
3	3	3	3	3	3	3	3	3	3	3	3	3	3	3	3	Zor bir dönem içerisindeydik, öğrenmekte güçlük yaşadık.	We were in a difficult period, we had difficulty in learning.
3	3	3	3	3	3	3	3	3	3	3	3	3	3	3	3	Yok	None
4	4	4	4	4	2	4	4	4	4	4	4	4	4	4	4	Kesinlikle öğrenme durumu geliştirilmesi gerekiyor. Öğretmenimiz oldukça bilgili bir insan fakat normalde bu dersler böyle mi anlatılır bilmiyorum. Ama ders slayttan okundu ve geçildi. Öğrenmeye katkısı koca bir sıfır. Ve hukuk bölümü gerçekten zor bir bölüm ve bu derste zordu. Ve hem vize hem de final sınavı zordu oldukça detay sorulmuştu. Yetkililerden ricam kesinlikle dersin işlenişini ve yapı…	The learning situation definitely needs to be improved. Our teacher is a very knowledgeable person, but I don't know if these lessons are normally taught like this. But the lesson was read from the slide and passed. Its contribution to learning is a big zero. And the law department is a really difficult department and it was difficult in this course. And both the midterm and final exams were diff…
4	4	4	4	4	4	4	4	4	4	4	4	4	4	4	4	Dersin hocası çok iyiydi	The teacher of the course was very good
3	3	4	4	4	4	4	4	3	4	4	4	4	4	4	4	Ders notları ayrıntılı ve her öğrencinin bilmesi gereken bilgilerle doluydu.	The lecture notes were detailed and full of information every student should know.
4	4	4	4	4	4	4	4	4	3	3	3	3	3	3	3	Daha iyi olabilir	could be better
4	4	4	4	4	4	4	4	4	4	4	4	4	4	4	4	Güzel bir dönem geçirdim emeği geçen herkese teşekkür ederim..	I had a great time. Thank you to everyone who contributed.
4	4	4	4	4	4	4	4	4	4	4	4	4	4	4	4	Öğretim elemanının konuya hakimiyeti ve konuyu aktarması çok iyiydi	The instructor's command of the subject and his ability to convey the subject were very good.
3	1	2	3	3	2	2	3	3	3	3	3	3	3	3	3	In labore ut ipsum	In labore ut ipsum
4	4	4	4	4	4	4	4	4	4	4	4	4	4	4	4	Bu döneme kadar kafamızı deneysel araştırmalardan kaldıramadık nerdeyse her dönem bu alanda ders aldık ama psikoloji için aynı derecede değerli olan nitel araştırmalardan sadece bu dersi olmış olmamız üzücü.	Until this period, we could not take our minds off experimental research and took courses in this field almost every semester, but it is a pity that we only took this course from qualitative research, which is equally valuable for psychology.
3	3	3	3	3	3	3	3	3	3	3	3	3	3	3	3	Çok iyidi	it was so good
3	2	4	4	4	4	4	4	4	4	4	4	4	4	4	4	Uzaktan olması hariç iyiydi slaytlar daha anlaşılabilir olabilir	It was good except for being from a distance. The slides could be more understandable.
3	3	3	3	3	3	3	3	3	3	3	3	3	3	3	3	herşey için teşekkürler	thank you for everything
3	3	3	3	3	3	3	3	3	3	3	3	3	3	3	3	Slayttan sordu, pratik koskoca yıl içinde sadece 1kez yapıldı. Bir şey öğrenemeden ve derse dahi katılmadan slayt ezberi yaptın.	He asked from the slide, the practice was done only once in a whole year. You memorized the slides without learning anything or even attending the lecture.
4	4	4	4	4	4	4	4	4	4	4	4	4	4	4	4	SAYIN HOCAM EMEKLERİNİZDEN DOLAYI TEŞEKKÜR EDER SAYGILARIMI SUNUARIM.	Dear Sir, I would like to THANK YOU FOR YOUR EFFORTS AND WITH MY RESPECT.
3	3	1	1	1	1	2	2	2	2	2	2	2	2	2	2	DERS ÇOK AĞIR VE FAZLA ÖĞRETİ İSTİYOR	THE COURSE IS TOO HARD AND REQUIRES TOO MUCH TEACHING
2	2	2	2	2	2	2	2	2	2	2	2	2	2	2	2	Uzaktan öğretim olduğu için çok verimli olmuyor	Since it is distance education, it is not very efficient
4	4	4	4	4	4	4	4	4	4	4	4	4	4	4	4	Hocamıza teşekkür ederim	Thank you to our teacher
4	4	4	4	4	4	4	4	4	4	4	4	4	4	4	4	Çok faydalı ve yararlı bir dönem dersi olduğunu düşünüyorum. Bize katkılarından dolayı çok teşekkür ederim.	I think it is a very useful and useful semester course. Thank you very much for your contributions to us.
4	4	4	4	4	4	4	4	4	4	4	4	4	4	4	4	TEŞEKKÜRLER	THANKS
1	1	1	1	1	1	1	1	1	1	1	1	1	1	1	1	Ara sınavımız online yapıldı sistem birçok kez hata verdi mağdur olduk çalıştığımız halde ara sınavdaki sistemin hatası öğrencilere yüklendi	Our midterm exam was held online, the system gave errors many times, we were victimized, but even though we worked hard, the error of the system in the midterm exam was blamed on the students.
3	3	3	3	3	3	3	3	3	3	3	3	3	3	3	3	Sınavlar daha çok pratik ağırlıklı olacak şekilde yapılıyor.Pratik dersler ve normal derslerin ders sayısını baz alırsak sınavda sorulan pratik ağırlığı fazla.Pratik derslerine duyulan ihtiyaç nedeniyle pratik dersinin ders sayısı arttırılmalı.	Exams are held in a way that focuses more on practice. Considering the number of practical courses and regular courses, the practical weight of the questions in the exam is high. Due to the need for practical courses, the number of practical courses should be increased.
4	4	4	4	4	4	4	4	4	4	4	4	4	4	4	4	Sınav hazırlama dersi üniversite hayatım boyunca en çok zorlandığım derslerden biriydi. Gerçekten anlaşılması ve uygulaması zor bir ders. Hocamız verdiği ödevlerde çok açık ve net bir guideline kullanmış bu yüzden ödevlerimizi daha rahat bir şekilde yapabildiğimizi düşünüyorum. Vize ve final sınavlarımız çok parlak değil bu derste ve beni son dönemimde "acaba kaldım mı?" diye düşündürten, sonucun…	Exam preparation course was one of the most difficult courses during my university life. It is truly a difficult lesson to understand and apply. Our teacher used a very clear guideline in his homework, so I think we were able to do our homework more easily. Our midterm and final exams were not very bright in this course, and in my last semester I was left wondering "did I fail?" It's a lesson tha…
3	3	3	3	3	4	4	3	4	3	3	3	3	3	3	3	Güzel	Beautiful
4	4	4	4	4	4	4	4	4	4	4	4	4	4	4	4	Teşekkürler	Thanks
4	4	4	4	4	4	4	4	4	4	4	4	4	4	4	4	TEŞEKKÜRLER	THANKS
3	3	3	3	3	3	3	3	3	3	3	3	3	3	3	3	Güzel	Beautiful
4	4	4	4	4	4	4	4	4	4	4	4	4	4	4	4	SAYIN HOCAM EMEKLERİNİZDEN DOLAYI TEŞEKKÜR EDER VE SAYGILARIMI SUNARIM.İNKILAP DERSİ ANCAK BU KADAR GÜZEL ANLATILABİLİRDİ.BİZİM İÇİN ÇOK DEĞERLİSİNİZ.	DEAR TEACHER, I THANK YOU FOR YOUR EFFORTS AND GIVE MY RESPECT. THE REVOLUTION COURSE COULD ONLY HAVE BEEN EXPLAINED THIS BEAUTIFULLY. YOU ARE VERY VALUABLE TO US.
4	4	4	4	4	4	4	4	4	4	4	4	4	4	4	4	Ders sorumlusu öğretim elemanın gerek ders anlatımı gerek derste sorduğu cevapsız sorularının gerçekten bir üniversite dersine yakıştığını düşünmekle beraber sınavın hazırlanmasında ve süre belirlenmesinde kişisel duygularının karışmaması gerektiğini savunmaktayım.	Although I think that the instructor's lecture and the unanswered questions he asks during the course really suit a university course, I argue that his personal feelings should not interfere with the preparation of the exam and the determination of the time.
3	3	3	3	4	4	4	4	4	4	4	4	4	4	4	4	gayet verimli bir dersti	It was a very productive lesson.
4	4	4	4	4	4	4	4	4	4	4	4	4	4	4	4	Teşekkür ediyorum	thank you
4	4	4	4	4	4	4	4	4	4	4	4	4	4	4	4	ders güzel ve eğlenceli	the lesson is nice and fun
4	4	4	4	4	4	3	4	4	3	3	3	3	3	3	3	Çok İlgili Ve Başarılı, öğretici bir ders oldu	It was a very relevant and successful, instructive lesson
4	4	4	4	4	4	4	4	4	4	4	4	4	4	4	4	leşep	rubbish
4	4	4	4	4	4	4	4	4	4	4	4	4	4	4	4	en sevdiğim ders.	my favorite lesson.
4	4	4	4	4	4	4	4	4	4	4	4	4	4	4	4	dersten memnundum	I was happy with the lesson
1	1	1	1	1	1	1	1	1	1	1	1	1	1	1	1	Hocamızın not verişi hiç hakkaniyetli değil.	Our teacher's grading is not fair at all.
4	4	4	4	4	4	4	4	4	4	4	4	4	4	4	4	Bu dönem koşullar sebebiyle derste kullanılan yansıların öğrencilerle paylaşılması, sınav öncesi son genel tekrar açısından faydalı olmuştur. Sonraki dönemlerde de uygulanması dileği ile.	Due to the conditions this semester, sharing the reflections used in the course with the students was beneficial for the last general review before the exam. Hoping it will be implemented in future periods as well.
4	4	4	4	4	4	4	4	4	4	4	4	4	4	4	4	Sayın Hocamıza tüm katkıları için teşekkür ediyorum.	I would like to thank our esteemed teacher for all his contributions.
4	4	4	4	4	4	4	4	4	4	4	4	4	4	4	4	Çok iyi geçti	It went very well
4	4	4	4	4	4	4	4	4	4	4	4	4	4	4	4	Ders içeriğine uygun olarak işlendi. Uygulama dersleri biraz daha fazla olabilirdi.	It was taught in accordance with the course content. Practice lessons could have been a little more.
4	4	4	4	4	4	4	4	4	4	4	4	4	4	4	4	Emekleriniz için teşekkür ediyorum hocam.	Thank you for your efforts, sir.
3	3	4	3	4	4	3	4	4	4	4	4	4	4	4	4	Dersler çok yoğun ve advance seviyeydi	The lessons were very intense and advanced level.
4	4	4	4	4	4	4	4	4	4	4	4	4	4	4	4	Dersten oldukça verim aldım ve hocam alanında oldukça deneyimli, bilgili, bizlere karşı anlayışlı ve kibardı.	I got a lot of benefit from the course and my teacher was very experienced, knowledgeable, understanding and polite towards us.
3	3	3	3	3	3	3	3	3	3	3	3	3	3	3	3	Bu derste öğrenimi zor ve karışık bir dersti sınavda berbattı yüzyüze olması saçmalıktı ve online ders verimsizdi sınavda buna rağmen zordu bu dönem hiç güzel geçmedi kısacası	This course was a difficult and complicated course to learn, the exam was terrible, face-to-face was ridiculous and the online course was inefficient, the exam was still difficult, in short, this semester was not good at all.
4	4	4	4	4	4	4	3	3	3	3	3	3	3	3	3	Emekleriniz için çok teşekkür ederiz. Sadece sizle alakası olmasa da sınavın bu kadar zor olup ortalamamızın düşmesini istemezdim.	Thank you very much for your efforts. Even though it has nothing to do with you, I wouldn't want the exam to be this difficult and our GPA to drop.
4	4	4	4	4	4	4	4	4	4	4	4	4	4	4	4	Kalkulus dersinin bizim bölümümüz için gerekli olduğunu düşünmüyorum.	I don't think calculus course is necessary for our department.
4	4	4	4	4	4	4	4	4	4	4	4	4	4	4	4	Cok teşekkür ederim!	Thank you very much!
3	3	3	3	3	3	3	3	3	3	3	3	3	3	3	3	Hocanın bize ulaşmaması ve bizim ona ulaşmamız bir sorundu bence ayrıca bize öğretmeyip yanlış okudunuz diyip üstü kapalı geçmesi online olduğu için hiç güzel geçmedi ve teknik sorunlar nedeniyle vizem bir tık düşük oldu hoca çok erteleyici ve umursamaz bir tavrı vardı hep geç yaptı işini ya da bizi oyaladı mesela ders kayıdı almadı ve bize aldım teknik sorunlardan atamıyorum demesi gibi bu derst…	I think it was a problem that the teacher did not reach us and we did not reach him. Moreover, it did not go well at all because it was online and he did not teach us but implicitly said that you read it wrong and my visa was a little low due to technical problems. The teacher had a very procrastinating and indifferent attitude. He always did his job late or kept us busy, for example, he did not …
1	1	1	1	1	1	1	1	1	1	1	1	1	1	1	1	Dersin içeriği her ne kadar kapsayıcı ve yeterli olsa da ilgili öğretim elemanının gerek ders notlarının özensizliği , gerek işlenişteki yetersizliği ve kazanımları doğru şekilde ölçmeyen sınavları ve öğrenciye olan kaba ve sert tutumu sebebiyle dersten yeterli verimi alamadığımı düşünüyorum.	Even though the content of the course is comprehensive and sufficient, I think that I could not get enough out of the course due to the carelessness of the course notes of the relevant instructor, the inadequacy in teaching, the exams that did not measure the achievements correctly, and the rude and harsh attitude towards the student.
3	3	3	3	3	2	3	2	4	2	2	2	2	2	2	2	Hocamız alanında gayet başarılı ve bilgili fakat bilgiyi bize aktarma ve öğretme açısından çok etkili olduğunu söyleyemem. Teams gibi kolay bir uygulamayı kullanmakta da zorluklar yaşadı fakat en büyük sorun final sınavını saat 10.00'da sanıp bizleri 20 dakika bekletmesiydi, final sınavımız saat 09.30 da idi. Ayrıca saat 11.00'de başka bir sınavımız daha vardı, gereksiz yere strese girdik. Dönem …	Our teacher is very successful and knowledgeable in his field, but I cannot say that he is very effective in terms of transferring and teaching knowledge to us. He also had difficulties using an easy application like Teams, but the biggest problem was that he thought the final exam was at 10.00 and kept us waiting for 20 minutes. Our final exam was at 09.30. We also had another exam at 11:00, so …
4	4	4	4	4	4	4	4	4	4	4	4	4	4	4	4	Güzel	Beautiful
4	4	4	4	4	4	4	4	4	4	4	4	4	4	4	4	Çok olumlu geçti, bana birçok kazanım sağladı değerli hocamız.	It was very positive, our valuable teacher provided me with many gains.
4	4	4	4	4	4	4	4	4	4	4	4	4	4	4	4	Adı itibariyle korktuğum derslerden biriydi fakat hocamızın anlatışı sayesinde çekinmenin gereksiz olduğunu anladım.	It was one of the courses that I was afraid of due to its name, but thanks to our teacher's explanation, I realized that it was unnecessary to hesitate.
4	4	4	4	4	4	4	4	4	4	4	4	4	4	4	4	İYİ	GOOD
4	4	4	4	4	4	4	4	4	4	4	4	4	4	4	4	Dersin içeriği gayet iyi öğretim elamanından gayet memundum yaptığımız projeler ödevler derse gayet uyumluydu	The content of the course was very good, I was very pleased with the instructor, the projects and homework we did were very compatible with the course.
3	3	3	3	3	3	3	3	3	3	3	3	3	3	3	3	ülkece olağanüstü bir hal yaşamışken''ZORLA'' kameralarımızı açtırmak nedir?!!! Bütün hocalar bu konuda müsamaha anlayış gösterirken bu neyin zorbalığı böyle?	What is it like to "FORCE" our cameras on when our country is experiencing an extraordinary situation?!!! What kind of tyranny is this when all teachers show tolerance and understanding on this issue?
3	3	3	1	1	1	4	4	4	4	4	4	4	4	4	4	Hocamıza saygım sonsuz olmakla beraber dersin zor bir ders olduğunu da kabul ederek temelde tek bir sorun olduğunu ve bu sorunun da hocamızla aramızdaki kuşak farkı olduğunu düşünüyorum, zira gerek kaynaklardaki gerek kullanılan dildeki sözcük seçimleri bile bu farkı göstermekte. Hukuk fakültesi ve özellikle eşya hukukunda elbette Türkçe kökenli sözcükler yerine zaman zaman farsça-arapça-latin kö…	Although I have the utmost respect for our teacher, I also accept that the course is a difficult one, and I think that there is basically only one problem and that this problem is the generation gap between our teacher and us, because even the word choices in both the sources and the language used show this difference. Of course, in law school and especially in property law, words of Persian-Arab…
4	4	4	4	4	4	4	4	4	4	4	4	4	4	4	4	Hocamızı çok seviyorum ve dersin işlenişini çok güzel bir şekilde kontrol ediyor. Dersi her ne kadar sevmesem de hocamız birlikte işlenince bir nebze güzel oluyor.	I like our teacher very much and he controls the course of the lesson very well. Even though I don't like the course, it is a bit better when taught together with our teacher.
4	4	4	4	4	4	4	4	4	4	4	4	4	4	4	4	J	J.
4	4	4	4	4	4	4	4	4	4	4	4	4	4	4	4	Ders benim için eğitici ve keyifliydi. Teşekkür ederim.	The lesson was educational and enjoyable for me. Thank you.
4	4	4	4	4	4	4	4	4	4	4	4	4	4	4	4	öğretmenin dersi işleyişi iyidi	The teacher taught the lesson well
2	2	3	3	3	2	1	2	2	3	3	3	3	3	3	3	Öğretim elemanının online eğitimdeki performansı yetersizdi. Online eğitime başlandığı zaman beni Teams sınıfına eklememişti ve arkadaşlarım bu durumu dile getirdiğinde problemi kendim çözmem gerektiğini söylemişti. Teams sınıfına geç de olsa girebildim ama yine de derslerde kullanılan materyal ve sunumlar yeterli zorluk düzeyinde değildi.	The instructor's performance in online education was inadequate. When online education started, he did not add me to the Teams class, and when my friends brought up this situation, he said that I should solve the problem myself. I was able to enter the Teams class, albeit late, but the materials and presentations used in the classes were still not at a sufficient difficulty level.
4	4	4	4	4	4	4	4	4	4	4	4	4	4	4	4	Çok keyifli ve verimliydi.	It was very enjoyable and productive.
4	3	4	3	4	3	4	3	4	3	3	3	3	3	3	3	UYGUN	SUITABLE
4	4	4	4	4	4	4	4	4	4	4	4	4	4	4	4	Çok memnunum	I am very satisfied
3	3	3	3	3	3	3	3	3	3	3	3	3	3	3	3	Yok	None
4	4	4	4	4	4	4	4	4	4	4	4	4	4	4	4	Dersler gayet verimli geçti.Sunumlar bizlere Türk Edebiyatına katkı sağlayan şair ve yazarlar hakkında bilgiler kazandırdı.	The lessons were very productive. The presentations gave us information about the poets and writers who contributed to Turkish Literature.
4	4	4	4	4	4	4	4	4	4	4	4	4	4	4	4	Ders günü ders saati hiç bitmesin istedim.Çok keyifle geçen çok öğretici bir dönem oldu benim için	I wanted the lesson time to never end. It was a very enjoyable and instructive period for me.
4	4	4	4	4	4	4	4	4	4	4	4	4	4	4	4	Hocamız çok samimi ve yardımcıydı.Dersin içeriği de bence oldukça kolaydı.	Our teacher was very friendly and helpful. I think the content of the course was quite easy.
4	4	4	4	4	4	4	4	4	4	4	4	4	4	4	4	Memnun olduğum bir derstti	It was a lesson that I was satisfied with.
4	4	4	4	3	4	4	4	4	4	4	4	4	4	4	4	İçerik olarak zengin bir içeriğe sahip bir ders.Öğretim elemanları olaraksa hepsi kendini geliştirmiş yeterlilik düzeyine varmış öğretim elemanları benim görüşüm bu yönde.	It is a course with rich content. As for the faculty members, all of whom have improved themselves and reached the level of proficiency, this is my opinion.
4	4	4	4	4	4	4	4	4	4	4	4	4	4	4	4	GÜZEl	Beautiful
4	4	4	4	4	4	4	4	4	4	4	4	4	4	4	4	Bana ekmeği sevdiren öğreten kalbime dokunan yegane insan iyi ki buradayım dedirten hoca	The only person who made me love bread, who taught me, who touched my heart, is the teacher who made me say "I'm glad I'm here."
4	4	4	4	4	4	4	4	4	4	4	4	4	4	4	4	Hocamız gerçekten çok güzel ders anlatıyor. Aklımıza bi şey takıldığında, aklımıza takılan şeyin ne olduğunu söylemeden anlayacak kadar konuya hakim ve bu dersi ayrıca anlaşılır kılıyor.Ayrıca hocamızın derse gelirken cidden isteyerek geldiğini hissediyorum bu da beni derse katılmaya teşvik ediyor.	Our teacher teaches really well. When we have something on our mind, he is knowledgeable enough to understand what is on our mind without telling him what it is, and this makes the lesson understandable. I also feel that our teacher comes to the lesson with real desire, which encourages me to participate in the lesson.
4	4	4	4	4	4	4	4	4	4	4	4	4	4	4	4	Teşekkürler	Thanks
4	4	4	4	4	4	4	4	4	4	4	4	4	4	4	4	En sevdiğim dersti	It was my favorite lesson
4	4	4	4	4	4	4	4	4	4	4	4	4	4	4	4	Dersin içeriğinde ve işlenişinde çok fazla cinsiyetçi yaklaşımlar söz konusu. Bazı konularda özellikle bu cinsiyet ayrımı daha çok konuşuluyor. Dersin gidişatı açısından bu tutumu olumsuz buldum.	There are many sexist approaches in the content and teaching of the course. In some subjects, especially this gender discrimination is talked about more. I found this attitude negative in terms of the course of the course.
3	3	3	3	3	3	3	3	3	3	3	3	3	3	3	3	a	a
3	4	4	4	4	2	4	4	4	4	4	4	4	4	4	4	Dönem boyunca her nerdeyse her hafta ödev yapmamıza rağmen finalimizin de ödev şeklinde olmaması gerektiğini düşünüyorum. Dönem içinde makale derleme çalışması gibi büyük ödevler de teslim ettik buna rağmen finalde ekstra ödev yaptık. Dönem içinde hocamızın anlatmak istediklerini anlamakta zorlandığım anlar oldu.	Even though we do homework almost every week during the semester, I think our final should not be in the form of homework either. We also submitted large assignments, such as article compilation work, during the semester, but we did extra homework in the final. There were moments during the semester when I had difficulty understanding what our teacher wanted to say.
4	4	4	4	4	4	4	4	4	4	4	4	4	4	4	4	İYİYDİ	IT WAS GOOD
4	4	4	4	4	4	4	4	4	4	4	4	4	4	4	4	her şey mükemmeldi <3	everything was perfect <3
4	4	2	1	1	1	4	2	3	4	4	4	4	4	4	4	Öğretim elemanı mutlaka yeterlidir fakat kullandığı slaytlar hiç anlaşılır değil aksine kafa karıştırıcı. Sınavlar öğrenmeyi ölçecek düzeyde değil oldukça yetersiz ve puanlamaları mantıklı değil. Ders oldukça zordu ve bana hiçbir şey katmadı ve bir şey öğrenemedim.	The instructor is certainly competent, but the slides he uses are not at all understandable, on the contrary, they are confusing. The exams are not at a level to measure learning, they are quite inadequate and their scoring does not make sense. The course was quite difficult and did not add anything to me and I did not learn anything.
4	4	4	4	4	4	4	4	4	4	4	4	4	4	4	4	BÖYLE BİR HOCA HAYATIMA GİRDİĞİ İÇİN ŞANSLIYIM. HER ŞEY İÇİN ÇOK TEŞEKKÜRLER...	I AM LUCKY TO HAVE SUCH A TEACHER IN MY LIFE. THANKS VERY MUCH FOR EVERYTHING...
3	3	3	3	3	3	2	2	2	2	2	2	2	2	2	2	Güzel ve verimli bir dersti	It was a nice and productive lesson
4	4	4	4	3	3	3	3	2	2	2	2	2	2	2	2	Güzeldi	it was nice
4	4	4	4	4	4	4	4	4	4	4	4	4	4	4	4	Ders içeri gayet yeterliydi. Hocamıza teşekkür ederim.	The course was quite sufficient. Thank you to our teacher.
3	3	3	3	3	3	3	3	3	3	3	3	3	3	3	3	Benim için zor bir dersti.	It was a hard lesson for me.
4	4	4	4	4	3	4	4	4	4	4	4	4	4	4	4	iyi	Good
3	3	3	3	3	3	3	3	3	3	3	3	3	3	3	3	yeterli	sufficient
3	4	3	4	4	4	4	4	3	3	3	3	3	3	3	3	Çok öğretici bir kurdu.Deniz hocama tüm kattıkları için çok teşekkür ederim.	He was a very instructive teacher. I would like to thank my teacher Deniz for all his contributions.
4	4	4	4	4	4	4	4	4	4	4	4	4	4	4	4	Öğretmenimizi çok sevdim	I liked our teacher very much
4	4	4	4	4	4	4	4	4	4	4	4	4	4	4	4	Dersin içeriği oldukça eğlenceli ve öğreticiydi, hocamız harikaydı gerek ders gerek hayat konusunda pek çok katkıda bulunmuştu. Her ders ufkumuzu daha da genişletir farklı bakış açıları sunardı. Kullanılan materyaller hem içerik hem düzen bakımından süperdi. Eğitim sırasında hiçbir aksama yaşamadık aynı zamanda hiçbir sorumuz cevapsız kalmazdı.	The content of the course was very entertaining and instructive, our teacher was great and contributed a lot both to the course and to life. Each lesson broadened our horizons and offered different perspectives. The materials used were superb in terms of both content and layout. We experienced no disruptions during the training, and none of our questions would remain unanswered.
1	1	1	3	3	1	1	1	1	1	1	1	1	1	1	1	Pek ilgili olduğunu düşünmüyorum	I don't think it's very relevant
3	3	3	3	3	3	3	3	4	3	3	3	3	3	3	3	Hocamız çok özverili dir	Our teacher is very dedicated.
3	3	2	3	2	1	2	3	3	1	1	1	1	1	1	1	Bence dersin bölümümle alakasız oluşu ve anlatılan dersin içeriği gereğinden fazla detaycı oluşu sadece ödevler üzreine yoğunlaşması dolayısıyla pek sevdiğim ve isteyerek geldiğim bir ders olmadı yine de teşekkürler.	In my opinion, it was not a course that I liked very much and that I came to willingly, as the course was irrelevant to my department, the content of the course was too detailed and focused only on homework, thank you.
2	2	3	3	3	3	2	2	2	2	2	2	2	2	2	2	Öğretim elemanının daha yardımcı, öğrenci dostu ve açıklayıcı olmasını beklerdim. ASM bakım planlarımız stajımızın üzerinden 2 ay geçmesine rağmen hala okunmamış. Daha fazla özveri, sabır, ilgi ve destek beklerdim.	I expected the instructor to be more helpful, student-friendly and explanatory. Our ASM maintenance plans have still not been read even though 2 months have passed since our internship. I expected more dedication, patience, attention and support.
4	4	4	4	4	4	4	4	4	4	4	4	4	4	4	4	Kesinlikle çok ilgili ve yardım sever hocaydı	He was definitely a very caring and helpful teacher.
4	4	4	4	3	3	4	4	4	4	4	4	4	4	4	4	Bu sene bildiğimiz üzere chapgbt üzerinden yeterince kopya olmaktadır. Hak etmeyen arkadaşlarımız tam puan alırken öğrenmeye çalışanlar olarak bizler hak etmediğimiz puanları almaktayız. Dönem boyunca verilen ödevlerde de aynı olay yaşanmıştır. Ders bağlamında rahatsız olduğum için belirtmek istedim. Bizlere katkılarınızdan dolayı teşekkür ederim..	As we know this year, there are enough copies on chapgbt. While our friends who do not deserve it receive full points, we, as those who try to learn, receive points we do not deserve. The same thing happened with the homework given throughout the semester. I wanted to point it out because I was uncomfortable in the context of the lesson. Thank you for your contributions to us.
4	4	4	4	4	4	4	4	4	4	4	4	4	4	4	4	QR kodu okutma kısmında bu işle görevli kişilerin işini kolaylaştıracak bir sistem geliştirilmeli, öğrencilerde kendi sisteminde qr ı okutup okutmadıklarını görebilmeliler.	A system should be developed to facilitate the work of those responsible for scanning the QR code, and students should be able to see whether they have scanned the QR code in their own system.
4	4	4	4	4	3	4	4	4	4	4	4	4	4	4	4	Hukuk felsefesi dersi, öğrencilerin hak ettiği ilgiyi göstermediği ve fakat bir hukuk fakültesi mezunu ile hukukçuyu ayıracağına inandığım (hukuk sosyolojisi, genel kamu hukuku, hükümet sistemleri, insan hakları hukuku ile) derslerden biri. Kanaatimce bu tip derslerin, maddi ve usul hukuku derslerinin yoğun olduğu 3-4. Sınıflarda okutulmasındansa henüz hukuk fakültesine giriş yıllarında okutulmas…	Philosophy of law course is one of the courses (along with sociology of law, general public law, government systems, human rights law) that students do not pay the attention it deserves, but which I believe will differentiate a law faculty graduate from a lawyer. In my opinion, these types of courses are taught in the 3rd and 4th grades, where substantive and procedural law courses are intensive.…
4	4	4	4	4	4	4	4	4	4	4	4	4	4	4	4	hocanın anlatımı çok etkindi ve anlaşılırdı tekrardan bu hocayı seçeceğim keyifli bir dersti	The instructor's explanation was very effective and understandable. I would choose this instructor again. It was an enjoyable course.
4	4	4	4	4	4	4	4	4	4	4	4	4	4	4	4	Öğretim elemanı Sn. Yurdacan çoğu zaman öğrenciyi çeşitli etkinliklerle derse dahil etmiş, mesleki açıdan öğrencinin ihtiyacı olacak bilgileri, uygulamaları dönem içerisinde verilen ödevlerle , pratik ve prova etmesini sağlamıştır. Öğrenci ile iletişimi saygı çerçevesinde ve öğrencinin kişisel gelişimi açısından destekleyici olmuştur.	Lecturer Mr. Yurdacan often included the student in the course with various activities, and ensured that the student practiced and rehearsed the information and applications he/she would need professionally, with the assignments given during the semester. His communication with the student was respectful and supportive of the student's personal development.
4	4	4	4	4	4	4	4	4	4	4	4	4	4	4	4	Umarim hocamjz kendine dikkat et, bizimle paylastigi bilgiler icin tesekkur ederim	I hope you take care of yourself, teacher, thank you for the information you shared with us.
3	3	3	3	3	3	3	3	3	3	3	3	3	3	3	3	ENG199 dersi hazırlık derslerinden daha kolay bir ders idi. Akademik İngilizce öğrenirken bu kadar basit konular hakkında öğreti olması boşu boşuna ders görüyormuşuz hissiyatı vermekte. Kullanılan kitap yetersiz bir kitap akademik anlamda hiçbir gramer yapısı öğretmiyor sadece listening, writing ve reading alanında yoğunlaşan kısım gramer ve speaking konularında yetersiz. Ek bir kitap kullanılmas…	ENG199 course was an easier course than the preparatory courses. While learning academic English, being taught about such simple subjects makes us feel like we are studying for nothing. The book used is insufficient. It does not teach any grammatical structure in an academic sense. Only the part that focuses on listening, writing and reading is insufficient in terms of grammar and speaking. An ad…
4	4	4	4	4	4	4	4	4	4	4	4	4	4	4	4	Teşekkürler	Thanks
4	4	4	4	4	4	4	4	4	4	4	4	4	4	4	4	Ders benim için verimli ve keyifliydi. Teşekkürler.	The lesson was productive and enjoyable for me. Thanks.
4	4	4	4	4	4	4	4	4	4	4	4	4	4	4	4	Keşke böyle uygulamali olan derslerin sinavlari da uygulamali olsa (final sınavi)	I wish the exams of such applied courses were also practical (final exam)
3	3	3	3	3	3	3	3	3	3	3	3	3	3	3	3	Gayet öğretici bi dönemdiler açıdan faydalı oldu.	It was a very instructive period and it was useful.
4	4	4	4	4	4	4	4	4	4	4	4	4	4	4	4	2 HOCAMIZDAN DA GAYET MEMNUNUM	I AM VERY SATISFIED WITH BOTH OF OUR TEACHERS
4	4	4	4	4	4	4	4	4	4	4	4	4	4	4	4	Öncelikle derste öğrenmemiz gereken temel/esansiyel bilgilerin tarafıma öğretilmiş olduğunu, dersten oldukça memnun kaldığımı belirtmek istiyorum. Ekstra olarak, bu ders beni İşitme Kayıplı Olan, Farklı Yaş Gruplarındaki İnsanlara karşı olan Yaklaşım, Değerlendirme ve Müdahale konusunda benim için oldukça yol gösterici oldu. Öğretmenimize çok teşekkür ediyorum.	First of all, I would like to state that I was taught the basic/essential information that we needed to learn in the course and that I was very pleased with the course. Additionally, this course gave me a lot of guidance in Approach, Assessment and Intervention with People of Different Age Groups with Hearing Loss. I thank our teacher very much.
4	4	4	4	4	4	4	4	4	4	4	4	4	4	4	4	Dersin içeriği kullanılan materyallerle ve öğretim elemanının anlatımıyla uyumluydu	The content of the course was compatible with the materials used and the instructor's explanation.
4	4	4	4	4	4	4	4	4	4	4	4	4	4	4	4	Güzel bir dönemdi.	It was a good time.
3	3	3	3	3	3	3	3	3	3	3	3	3	3	3	3	Derslere düzenli katılım sağlamadım ama yine de güzeldi.	I didn't attend classes regularly, but it was still nice.
4	4	4	4	4	4	4	4	4	4	4	4	4	4	4	4	Teşekkür ederim	Thank you
4	3	4	4	4	3	4	4	2	4	4	4	4	4	4	4	Bilgisayarda ki uygulamaları daha iyi kullanmama yardımcı oldu.	It helped me use the applications on the computer better.
3	3	3	3	3	3	3	3	3	3	3	3	3	3	3	3	Verimli ders işleyişi	Efficient course execution
3	3	3	3	3	3	3	3	3	3	3	3	3	3	3	3	Faydalı ve zevkli bir ders.	A useful and enjoyable lesson.
3	3	3	3	3	3	3	3	3	3	3	3	3	3	3	3	Tesekkurler	Thanks
3	3	3	3	3	3	3	3	3	3	3	3	3	3	3	3	Daha iyi olabilir	could be better
4	4	4	4	4	4	4	4	4	4	4	4	4	4	4	4	Dersin içeriğinde belirli niteliklere uygun şekilde edebiyatın önemli olması konusunda bizleri aydınlattı. Verdiği bilgiler neticesinde kendisine teşekkür ediyorum. Dersin içeriği konular kapsamında en iyi şekilde işlendi.	He enlightened us about the importance of literature in accordance with certain qualifications in the course content. I would like to thank him for the information he provided. The content of the course was covered in the best way within the scope of the subjects.
4	4	4	3	3	2	3	4	4	3	3	3	3	3	3	3	Dersin konuları ne kadar bakıldığınızda çok da zor olmasa da derste anlatılanlarda hiç bir şey anlamayıp kendi kendime bütün konuları öğrenmem gerekti. Dersin içeriğindense asıl zor olan dersin öğretim görevlisinin istediği bilgiler ve istediği şekilde sınav kağıdını doldurmaktı	Although the topics of the course are not very difficult when you look at them, I did not understand anything in the course and had to learn all the subjects on my own. Rather than the content of the course, the most difficult part was filling out the exam paper with the information requested by the lecturer and as requested.
4	4	4	4	4	4	4	4	4	4	4	4	4	4	4	4	Güzel geçti	It went well
2	2	2	2	2	2	2	2	2	2	2	2	2	2	2	2	jettir baba	daddy is jet
4	4	4	4	4	4	4	4	4	4	4	4	4	4	4	4	X	X
4	4	4	4	4	4	4	4	4	4	4	4	4	4	4	4	Gayet güzel ve faydalı bir dersti	It was a very nice and useful lesson.
3	3	3	3	3	3	3	3	3	3	3	3	3	3	3	3	kendimizi değerlendirelim kısmları dışında bir sorun yaşamadım	I did not experience any problems other than the let's evaluate ourselves parts.
4	4	4	4	4	4	4	4	4	4	4	4	4	4	4	4	Görüşlerim olumlu	My opinions are positive
4	4	4	4	4	4	3	4	4	4	4	4	4	4	4	4	Hocamız çok tatlı ve dersi genel olarak oldukça güzel geçti. Hocadan bağımsız olarak ders saatinin üç saat olması sadece son saatte biraz kopukluğa neden oluyor ve aslında ders 2 saat içinde de işlenebilirdi.	Our teacher was very sweet and the lesson went very well overall. Regardless of the teacher, the fact that the lesson is three hours only causes some disconnection in the last hour, and in fact the lesson could have been taught in 2 hours.
4	4	4	4	4	4	4	4	4	4	4	4	4	4	4	4	SUPER	SUPER
4	3	3	4	2	3	4	3	3	3	3	3	3	3	3	3	ALDIĞIM EĞİTİMDEN MEMNUNUM	I AM SATISFIED WITH THE EDUCATION I RECEIVED
4	4	4	4	4	4	4	4	4	4	4	4	4	4	4	4	aa	ah
4	4	4	4	4	4	4	4	4	4	4	4	4	4	4	4	k	k
4	4	4	4	4	4	4	4	4	4	4	4	4	4	4	4	Hocam alanında uzman bir öğretmen bizlere de bunu bütün dönem boyunca gösterdi	My teacher is an expert in his field and he showed us this throughout the semester.
4	3	3	4	3	3	4	4	4	4	4	4	4	4	4	4	Bunun dışında bölüm Türkçe olarak geçiyor %30 İngilizce olarak değil. Dolayısıyla slaytların Türkçe olması gerektiğini düşünüyorum. Çünkü İngilizce slaytları Türkçe'ye çevirsek bile yanlış çeviri veya devrik cümle olarak çevirdiği için anlaşılabilirliği zorlaşıyor.	Apart from this, the section is in Turkish, 30% is in Turkish, not in English. Therefore, I think the slides should be in Turkish. Because even if we translate English slides into Turkish, it becomes difficult to understand because they are translated as wrong translations or inverted sentences.
3	3	3	3	3	3	3	3	3	3	3	3	3	3	3	3	derler çok güzeldi	They say it was very beautiful
3	4	4	3	3	3	3	3	3	3	3	3	3	3	3	3	Orta derece zor bir ders	A moderately difficult course
1	1	1	1	1	1	1	1	1	1	1	1	1	1	1	1	Öğretim elemanının dengesiz davranışları bulunmakta.	The instructor has unstable behavior.
4	4	4	4	4	4	4	4	4	4	4	4	4	4	4	4	Güzeldi islenis ancak cok akıcı gecmedi benim icin	It was nice, but it didn't go very smoothly for me.
1	1	2	2	2	2	2	1	3	3	3	3	3	3	3	3	dönem boyunca öğretim elemanımızla irtibat kuramadım maillere cevap vermiyor teamste yazdıklarımıza geri dönüş alamadım.canlı derslerde öğretim elemanının izni olmadığı için izleyemedim.hiç verimli değildi hiçbir şekilde bu öğretim elemanıyla iletişim kurulamadı.	I could not contact our instructor during the semester. He did not respond to e-mails. I did not receive a response to what we wrote to the teams. I could not watch the live lessons because the instructor did not have permission. It was not productive at all. This instructor could not be contacted in any way.
4	4	4	4	4	4	4	4	4	4	4	4	4	4	4	4	Slaytlar öğrencilerle paylaşılabilir	Slides can be shared with students
3	3	3	3	3	3	3	3	3	3	3	3	3	3	3	3	Yok	None
4	4	4	4	4	4	4	4	4	4	4	4	4	4	4	4	Çok güzel bi dönem geçirdik emekleriniz için çok teşekkür ederiz	We had a great time, thank you very much for your efforts.
4	4	4	4	4	4	4	4	4	4	4	4	4	4	4	4	Mutfak da farklı tatlar, farklı tarifler yapılması insanı daha cok heycanlandırıyor yapıldıktan sonra tadım yapmak merak etmek, öğrendiğimiz şeyleri evde de yapılması çok güzel.	Making different tastes and different recipes in the kitchen makes people more excited. It is great to taste and wonder after it is made, and to do the things we have learned at home.
4	4	4	4	3	3	3	3	3	2	2	2	2	2	2	2	dersin işleyişinden de hocamdan da çok memnunum.	I am very pleased with how the course works and with my teacher.
3	3	3	3	3	3	3	3	3	3	3	3	3	3	3	3	İnkılap dersimiz verimli bir şekilde geçti.	Our revolution lesson was productive.
2	2	2	2	2	2	2	2	2	2	2	2	2	2	2	2	Asistanlar yardım etmiyor	Assistants do not help
4	4	4	4	4	4	4	4	4	4	4	4	4	4	4	4	Çok iyi	Very good
4	4	4	4	4	4	4	4	4	4	4	4	4	4	4	4	Güzel	Beautiful
4	4	4	4	4	4	4	4	4	4	4	4	4	4	4	4	Teşekkür ederim	Thank you
3	3	3	3	3	3	3	3	3	3	3	3	3	3	3	3	iyi	Good
4	4	4	4	4	4	4	4	4	4	4	4	4	4	4	4	hocayıda dersi işleyişinide seviyorum	I like the teacher and how he teaches the lesson.
4	4	4	4	4	4	4	4	4	4	4	4	4	4	4	4	Gayet iyiydi her şey olması gerektiği gibiydi.	It was fine, everything was as it should be.
4	4	4	4	4	4	4	4	4	4	4	4	4	4	4	4	hepsine katılıyorum	I agree with all
4	4	4	4	4	4	4	4	4	4	4	4	4	4	4	4	Çok memnun kaldım. En içten saygılarımı sunarım	I was very pleased. I offer my most sincere respects
4	4	2	2	2	2	2	4	4	4	4	4	4	4	4	4	Dersin içeriği zordu.	The content of the course was difficult.
2	2	2	3	1	2	2	3	4	4	4	4	4	4	4	4	ders içeriği çok yoğun ve zordu ve öğrendiklerimizin bölüme herhangi bir katkısı olduğunu düşünmüyorum. ders slaytlarının geç yüklenmesi de ders takibini zorlaştırdı.	The course content was very intense and difficult, and I do not think that what we learned contributed to the department in any way. The late upload of lecture slides also made it difficult to follow the lecture.
4	4	4	4	4	4	4	4	4	4	4	4	4	4	4	4	Iyi	Good
4	4	4	4	4	4	4	4	4	4	4	4	4	4	4	4	çok memnun kaldım	I was very pleased
4	4	4	4	4	4	4	4	4	4	4	4	4	4	4	4	O	HE
3	3	3	3	3	3	3	3	3	3	3	3	3	3	3	3	Dersin bitki kısmının not degerlendirmesi ve genel olarak isleyisi daha iyi olmaliydi ve bitki kisminda bir iletisim eksikligi genel olarak dönem boyunca goruldu	The grade grading and overall functioning of the plant part of the course should have been better, and a lack of communication in the plant part was generally evident throughout the semester.
4	4	4	4	3	4	4	4	4	4	4	4	4	4	4	4	Hocamız gayet iyiydi. Bilgi akışı sınıfın içindeki anlatımı ve konuların matematiksel kısmı dersi hocanın anlatımıyla birleşince çok zevkli bir hâl aldı. Diğer taraftan anlamadığımız bir yer olunca bize tenefüsünü ayırdı ders esnasında zorlandığımız yerleri anlayarak daha basit bir halde anlatmayı başardı. Emeklerine sağlık .	Our teacher was very good. The flow of information in the classroom and the mathematical part of the subjects combined with the instructor's explanation made it very enjoyable. On the other hand, when there was something we did not understand, he took a break for us and managed to understand the parts we had difficulty with during the lesson and explain them in a simpler way. Thank you for your e…
4	4	4	4	4	4	4	4	4	4	4	4	4	4	4	4	Güzel geçti derslerimiz	Our lessons went well.
3	3	3	3	3	3	3	3	3	3	3	3	3	3	3	3	Devamsızlık konusunda öğrenciler çok zorluk yaşadı, slaytların anlaşılması güçtü	Students had a lot of difficulty with attendance, the slides were difficult to understand
4	4	4	4	4	4	4	4	4	4	4	4	4	4	4	4	kullanılan uygulama nsls çok kötüydü.	The application used was very bad nsls.
3	3	3	4	3	3	3	3	4	3	3	3	3	3	3	3	Yani iki sube arasında aktiflik farkı olduğu icin hocamızın da tavırları iki sınıfa karsı farklıydı. Ben de anksiyete olduğu icin asla konusamıyorum keske konusuo aktif olabilisem ama işte. Belki biz hocanın enerjisini almıs olabiliriz bu yüzden sonrasında o bizim enerjimizi kötü etkiledi derken bir cycle:) icersine girdik diyebiliriz?	In other words, since there was a difference in activity between the two branches, our teacher's attitudes were different towards the two classes. I can never talk because I have anxiety, I wish I could be active, but there you go. Maybe we may have taken the teacher's energy, so we can say that we entered a cycle when we said that he had a bad effect on our energy :)?
4	4	4	4	4	4	4	4	4	4	4	4	4	4	4	4	Güzeldi	it was nice
4	4	4	3	2	4	4	4	4	4	4	4	4	4	4	4	Ders slaytlarının zaman zaman yetersiz kaldığını düşünüyorum.	I think lecture slides are inadequate at times.
3	3	3	3	3	3	3	3	3	3	3	3	3	3	3	3	Biraz daha tahtaya işlemi göstererek açıklamak daha faydalı olucaktır	It would be more useful to explain the process by showing it on the board.
2	2	2	2	2	2	2	2	2	2	2	2	2	2	2	2	Secmeli ders olmasi lazim	It should be an elective course
3	3	3	3	3	3	3	3	3	3	3	3	3	3	3	3	gayet güzel	very nice
4	4	4	4	4	4	4	4	4	4	4	4	4	4	4	4	Öğretim elemanımıza çok değerli katkılarından dolayı teşekkür etmek istiyorum. Konusuna olan hakimiyeti, ilgi alanımızla ilgili bize önemli bilgiler vermesi, dersi işleme metot ve tarzı beni olumlu yönde çok etkiledi. Ilımlı bir ders ortamı ve güzel bir atmosfer yarattı. Yapıcı eleştiri ve katkılarda bulundu. Dersle ilgili geri bildirimleri zamanında ve açıklayıcı tarzda yaptı. Kaynak tavsiyeleri…	I would like to thank our faculty member for their valuable contributions. His command of his subject, his ability to give us important information about our field of interest, and his method and style of teaching the course impressed me in a positive way. He created a moderate lesson environment and a nice atmosphere. He made constructive criticism and contributions. He gave feedback about the c…
4	3	4	3	4	3	4	4	4	4	4	4	4	4	4	4	OLUMLU	POSITIVE
3	3	3	4	4	3	4	3	3	3	3	3	3	3	3	3	Öğretmenimiz çok ilgiliydi ama daha çok speaking e ağırlık verebilirdi	Our teacher was very interested, but he could have focused more on speaking.
3	4	4	4	4	4	3	3	4	3	3	3	3	3	3	3	Bu ders bizim psikolojik danışma uygulaması yaptığımız dersti. Benim için çok verimli ve önemli bir dersti. Hocamızın bize notumuzu nasıl verdiğini paylaşmasını isterdim. Yani sadece harf notu görmektense daha detaylı görmek isterdim. Onun dışında süreçte birçok şey öğrendim. Hocamızın da geri bildirimleriyle ilerlemeye çalıştım. Bazı noktalarda ise kendim bir şeyler bularak yapmaya çalıştım. Sür…	This was the course where we practiced psychological counseling. It was a very productive and important lesson for me. I wish our teacher would share how he gave us our grade. So, I would like to see it in more detail rather than just seeing the letter grade. Apart from that, I learned a lot of things in the process. I tried to progress with the feedback of our teacher. At some points, I tried to…
4	4	4	4	4	4	4	4	4	4	4	4	4	4	4	4	Bu dersin bana çok büyük farkındalık kazandırdığını düşünüyorum. Emeğiniz için teşekkür ediyorum güzel hocam.	I think this course gave me great awareness. Thank you for your effort, my dear teacher.
4	4	4	2	3	3	4	4	2	2	2	2	2	2	2	2	Uzaktan eğitimini aldığımız bu derste Türkçe'ye dair bilgilendirildik.	We were informed about Turkish in this distance education course.
3	3	3	3	3	3	3	3	3	3	3	3	3	3	3	3	Teşekürler	Thanks
1	1	1	1	1	1	1	1	1	1	1	1	1	1	1	1	Zor bir dersti, ingilizce olması da ayrıca zorlaştırıyordu bizim için hiç değilse sınav soruları daha kolay sorulabilir veya daha kısıtlı bir bölümden sorulabilirdi hayatımızda ilk defa gördüğümüz ingilizce hukuk terimlerini öğrenmek ayrıca konuyu anlayabilmek için hepsinin türkçesine çalışmak zordu ve akılda kalıcı olmuyordu.	It was a difficult course, and the fact that it was in English made it even more difficult for us. At least the exam questions could have been asked more easily or from a more limited section. It was difficult to learn the English legal terms that we saw for the first time in our lives, and to study all of them in Turkish in order to understand the subject, and it was not memorable.
4	4	4	4	4	4	4	4	4	4	4	4	4	4	4	4	Güzel	Beautiful
4	4	4	4	4	4	4	4	4	4	4	4	4	4	4	4	hocamız ilgili ve anlayışlıydı ancak dersin içeriği gerçekten anlamsız olduğunu düşünüyorum, eski başkent öğrencisi olarak. böyle bir dersin alınmasını açıkçası zaman kaybı olarak değerlendiriyorum. üstelik derslere girişi kısmında aşırı zorlandık. çok fazla kişi aynı anda girmeye çalıştığı için fazla zorlandık. yoksa hocadan kaynaklanan bir durum değildi, teşekkürler.	Our teacher was caring and understanding, but I think the content of the course was really meaningless, as a former student of the capital city. Frankly, I consider taking such a course as a waste of time. Moreover, we had a hard time getting into the classes. We had a hard time because too many people were trying to enter at the same time. Otherwise, it was not a situation caused by the teacher,…
1	2	1	2	2	2	2	2	3	4	4	4	4	4	4	4	Ybs öğrencilerine karşı tutumu çok kötüydü. Sürekli aşağılama eğilimindeydi.	His attitude towards YBS students was very bad. He was always inclined to belittle.
3	3	3	3	3	4	4	4	4	4	4	4	4	4	4	4	Dersteki okuduğumuz metinler daha kolay görünüyor ama sınavda daha ağır geliyor. Bunun biraz daha hafifletilmesi rica ederim. Derste ödev verilmesi çok daha iyi olabilir.	The texts we read in class seem easier, but they are harder on the exam. I would like this to be a little lighter. It would be much better to give homework in class.
4	4	4	4	4	4	4	4	4	4	4	4	4	4	4	4	fena zevkli bi ders	a very enjoyable lesson
4	4	4	4	4	4	4	4	4	4	4	4	4	4	4	4	Gerek anlatımı gerek sınavıyla muazzam bir hocaydı, hayatında başarılar dilerim.	He was a great teacher, both with his explanation and his exam, I wish him success in his life.
3	3	3	3	3	3	3	3	3	3	3	3	3	3	3	3	Oldukça yeterliydi	It was quite enough
4	4	4	4	4	4	4	4	4	3	3	3	3	3	3	3	Keyifli bir dersti. Farklı düzeylere yönelik etkinlik tasarlamak ve farklı etkinlikleri görmek bizi geliştirmeye yönelikti fakat ders kapsamında genel olarak objektif bir değerlendirme yapıldığını düşünmüyorum.	It was an enjoyable lesson. Designing activities for different levels and seeing different activities were aimed at improving us, but I do not think that an overall objective evaluation was made within the scope of the course.
4	4	4	4	4	4	4	4	4	4	4	4	4	4	4	4	Dünyanın en iyi calculus hocası.	The best calculus teacher in the world.
3	3	3	2	1	1	1	3	3	2	2	2	2	2	2	2	vize sınavımızda düşük aldık ve en büyük sebeplerinden birisi de sadece 2 soru sorulmuş olmasıydı. dönem içerisinde verilen tüm ödev, sınav vb. materyallerde bir soruda 3'ten fazla yönerge olduğundan dolayı yönergeleri takip etmekte ve tam olarak bizden ne istendiğini anlamakta zorluk çektik. kullandığımız kaynak kitap anlaşılması zordu. bunlar dışında öğrenme güçlüğü olan çocuklara nasıl yaklaşm…	We got low scores in our midterm exam and one of the biggest reasons was that only 2 questions were asked. All homework, exams, etc. given during the term. Since there were more than 3 instructions per question in the materials, we had difficulty following the instructions and understanding exactly what was asked of us. The sourcebook we used was difficult to understand. Apart from these, we lear…
4	4	4	4	4	4	4	4	4	4	4	4	4	4	4	4	Hocamızın katkıları için teşekkürler..	Thank you for our teacher's contributions.
3	3	3	3	3	3	3	3	3	3	3	3	3	3	3	3	Hoca çok iyiydi sağ olasın bize çok güzel deneyim sağladı	The teacher was very good, thank you, he gave us a great experience.
4	4	4	4	4	4	4	4	4	4	4	4	4	4	4	4	Quiz yerine ödev verilmesi daha uygun olabilirdi.	It would have been more appropriate to give homework instead of quizzes.
4	4	4	4	4	4	4	4	4	4	4	4	4	4	4	4	Ders çok güzeldi verim aldım.	The course was very good and I was productive.
1	1	1	1	1	1	1	1	1	1	1	1	1	1	1	1	Hocanın hem öğrencilere hem de araştırma görevlilerine yönelik tavr çok yanlıştı ayrıca derse devam konusunda da hoca tarafından çok büyük sıkıntılar yaşandı	The teacher's attitude towards both students and research assistants was very wrong, and the teacher also had great difficulties in attending the class.
4	4	4	4	4	4	4	4	4	4	4	4	4	4	4	4	teşekkür ederiz	thank you
4	4	4	4	4	4	4	4	4	4	4	4	4	4	4	4	Üniversite hayatımıza yardımcı olan bir dersti	It was a course that helped our university life.
3	3	3	3	4	3	3	4	4	4	4	4	4	4	4	4	Güzel geliştirici	nice developer
4	4	4	4	4	4	4	4	4	4	4	4	4	4	4	4	Dersin içeriği ve işlenişi dönem boyunca gayet verimli ve keyifliydi.	The content and teaching of the course was very productive and enjoyable throughout the semester.
4	4	4	4	4	4	4	4	4	4	4	4	4	4	4	4	Gayet güzeldi	It was very nice
4	4	4	4	4	4	4	4	4	4	4	4	4	4	4	4	TEŞEKKÜRLER	THANKS
4	4	4	4	4	4	4	4	4	4	4	4	4	4	4	4	yok	no
4	4	3	4	4	4	4	4	4	4	4	4	4	4	4	4	Uzaktan olması dışından her şey güzeldi	Everything was fine except it was from afar
4	4	4	4	4	4	4	4	4	4	4	4	4	4	4	4	Emekleri için hocamıza teşekkür ederim.	I would like to thank our teacher for his efforts.
3	3	3	3	3	3	3	3	3	3	3	3	3	3	3	3	Dersin işleyişi gayet güzeldi	The course process was very good.
4	4	4	4	4	4	4	4	4	4	4	4	4	4	4	4	Güzel ders	nice lesson
4	4	4	4	4	4	4	4	4	4	4	4	4	4	4	4	Yeterli teşekkürler	That's enough, thanks
4	4	4	4	4	4	4	4	4	4	4	4	4	4	4	4	Verimliydi. Teşekkür ederim hocamıza emeği için.	It was productive. I thank our teacher for his efforts.
4	4	4	4	4	4	4	4	4	4	4	4	4	4	4	4	Online eğitim daha iyi olabilirdi ama oldukça güzel yönetildi teşekkürler :)	Online education could have been better, but it was managed very well, thank you :)
4	4	4	4	4	4	4	4	4	4	4	4	4	4	4	4	ÇOK İYİ	VERY GOOD
4	4	4	4	4	4	4	4	4	4	4	4	4	4	4	4	Her şeyden çok memnundum.	I was very pleased with everything.
4	4	4	4	4	4	4	4	4	4	4	4	4	4	4	4	Hocamız öğrenci dostu ve sıcak duruşuyla çoğu öğrenciyi derse bağlı tuttu, anlatımı destekleyen görsel ve işitsel materyallerle dersi destekledi. Gayet akılda kalıcı ve etkili dersler işledik.	Our teacher kept most students engaged in the course with his student-friendly and warm attitude, and supported the course with visual and audio materials that supported the narrative. We taught very memorable and effective lessons.
4	4	4	3	3	3	3	3	4	4	4	4	4	4	4	4	Genel olarak çok yararlı buldugum ve zevk alarak dinlediğim, çalıştığım bir ders oldu donem boyunca. Öğretim elemanının dersi işleyiş şekli ve derse hakimiyeti de beni fazlasıyla etkiledi.	In general, it was a course that I found very useful and that I enjoyed listening to and studying throughout the semester. The way the instructor taught the course and his command of the course also impressed me greatly.
4	4	4	4	4	4	4	4	4	4	4	4	4	4	4	4	Canım hocam katkılarınız için çok teşekkürler	Dear sir, thank you very much for your contributions.
3	3	3	3	3	3	3	3	3	3	3	3	3	3	3	3	Verimli bir yıl değildi males okula gidemediğimiz için	It wasn't a productive year, unfortunately because we couldn't go to school.
4	4	4	4	4	4	4	4	4	4	4	4	4	4	4	4	İş yeri uygulaması dersi kapsamında çok bilgi ve tecrübe edindim. Yetkili öğretim elemanından çok iyi bir ders gördüm.	I gained a lot of knowledge and experience within the scope of the workplace application course. I had a very good lesson from the competent instructor.
4	4	4	4	4	4	4	4	4	4	4	4	4	4	4	4	Dersin öğretmeninden çok memnun kaldım	I was very pleased with the teacher of the course.
3	3	4	3	3	3	3	4	4	3	3	3	3	3	3	3	Öğretim elemanı, derste öğrenciyi rencide ederek aşağılayarak öğrenme zorluğu çekmemize ve dersten soğumamıza sebep oluyor. Sürekli olumsuz konuşarak öğrenciyi demoralize ediyor ve not konusunda da çok sıkıntı yaşadığımız bir öğretmen.	The instructor offends and humiliates the student during the lesson, causing us to have difficulty learning and becoming alienated from the lesson. He demoralizes the students by constantly talking negatively and he is a teacher with whom we have a lot of trouble regarding grades.
4	4	4	4	4	4	4	4	4	4	4	4	4	4	4	4	ders benlik değildi o yüzden benim için verimli de değildi ödevleri zordu sınavları kolaydı	The course was not for me, so it was not productive for me, the homework was hard, the exams were easy.
4	4	4	4	4	4	4	4	4	4	4	4	4	4	4	4	güzel	Beautiful
4	2	4	4	4	4	4	4	4	4	4	4	4	4	4	4	staj görmemiz bize bir artıdır. biz staj görürken yön gösteren öğretmenlerimizin olması ve bize yardımcı olmaları,destek çıkması ki çocukların sevgisi zaten bu bölümü isteyerek yapmama yarıyor.	Having an internship is a plus for us. The fact that we have teachers who guide us while we are doing our internship, help us and support us, and the love of the children helps me to do this department willingly.
3	3	3	3	3	3	3	3	3	3	3	3	3	3	3	3	iyi bir hoca	a good teacher
4	4	4	4	4	4	4	4	4	4	4	4	4	4	4	4	Güzel anlatım vardı	There was a good explanation
3	3	3	3	3	3	3	3	3	3	3	3	3	3	3	3	Yok	None
4	4	4	4	4	4	4	4	4	4	4	4	4	4	4	4	Çok verimli bir staj dönemiydi. Aslında hayatımızın bundan sonra nelerle karşılacağımızı görmüş oldum. Teorik anlamda kendimi çok geliştirdim. Uygulama kısmında da kendime çok şey kattım. Bu mesleği seçtiğim için çok mutluyum.	It was a very productive internship period. In fact, I have seen what we will face from now on in our lives. I have improved myself a lot in theoretical terms. I also added a lot to myself in the application part. I am very happy that I chose this profession.
3	3	3	3	3	3	3	3	3	3	3	3	3	3	3	3	YOK	NO
3	3	3	3	3	3	3	3	3	3	3	3	3	3	3	3	Güzeldi ama ders zordu bence	It was nice but I thought the course was difficult
3	3	3	3	3	3	3	3	3	3	3	3	3	3	3	3	zor	difficult
4	4	4	4	4	4	4	4	4	4	4	4	4	4	4	4	Çok nitelikli geçtiğini düşünüyorum	I think you passed very well.
4	4	4	4	4	4	4	4	4	4	4	4	4	4	4	4	Öğretici	Instructive
3	3	3	3	3	3	3	3	3	3	3	3	3	3	3	3	H	H
4	4	4	4	4	4	4	4	4	4	4	4	4	4	4	4	Verimli bir dersti	It was a productive lesson
3	3	3	3	3	3	3	3	3	3	3	3	3	3	3	3	İyi	Good
4	4	4	4	2	3	3	3	4	4	4	4	4	4	4	4	hocamız ve gelişim psikolojisi dersi gayet akıcı ve güzeldi. teşekkürler.	Our teacher and the developmental psychology course were very fluent and nice. thanks.
4	4	4	4	4	4	4	4	4	4	4	4	4	4	4	4	güzel	Beautiful
4	4	4	4	4	4	4	4	4	4	4	4	4	4	4	4	hocama faydalı bilgileri için çok teşekkür ediyorum.	I thank my teacher very much for his useful information.
4	4	4	4	4	4	4	4	4	4	4	4	4	4	4	4	İyi	Good
4	4	4	4	4	4	4	4	4	4	4	4	4	4	4	4	güzel bir ders hocamızda çok güzel anlatıyor keşke online olmasaydı :/	It's a nice lesson, our teacher explains it very well, I wish it wasn't online :/
4	4	4	4	4	4	4	4	4	4	4	4	4	4	4	4	Her şey yeterli ve güzeldi.	Everything was sufficient and nice.
4	4	4	4	4	4	4	4	4	4	4	4	4	4	4	4	Uzaktan eğitimle verilebilmesi en zor dersimiz olmasına rağmen öğretim elemanımız sayesinde sorun yaşamadan derslerimizi sürdürebildik	Although it was our most difficult course to teach via distance education, we were able to continue our courses without any problems thanks to our instructor.
4	4	4	4	4	4	4	4	4	4	4	4	4	4	4	4	Emekleriniz için teşekkür ederiz hocam	Thank you for your efforts, sir.
3	3	3	3	3	3	2	3	3	3	3	3	3	3	3	3	Dersler Zoom'da gerçekleşti. Dersin işlenişi daha dikkat çekici olabilir. Genel olarak, öğretim elemanı konuyu anlatıp soru varsa soruları yanıtlayarak ders yaptı. Zoom'daki dersler odaklanma açısından zorluk yarattığı için daha interaktif bir ders olması daha kolay odaklanmayı sağlayabilirdi. Genel anlamda, öğretici dersler yapıldı. Teşekkürler.	Lessons took place on Zoom. The teaching of the lesson could be more eye-catching. In general, the instructor taught the lesson by explaining the subject and answering any questions. Since classes on Zoom create difficulties in terms of focusing, a more interactive lesson would have made it easier to focus. In general terms, instructive lessons were held. Thanks.
4	4	4	4	4	4	4	4	4	4	4	4	4	4	4	4	iyiydi	it was good
4	4	4	4	4	4	4	4	4	4	4	4	4	4	4	4	Hocamız uzaktan öğrenim döneminde dahi bize her konuda çok yardımcıydı. Onunla tanışmak herkes için büyük bir şans. Her şey için teşekkürler.	Our teacher was very helpful to us in every aspect, even during the distance learning period. It is a great chance for everyone to meet him. Thanks for everything.
4	4	4	4	4	4	4	4	4	4	4	4	4	4	4	4	Cok verimli bir yıldı teşekkür ediyoruz?	It was a very productive year, thank you.
4	4	4	4	4	4	4	4	4	4	4	4	4	4	4	4	TEŞEKÜRLER	THANKS
2	2	2	2	2	3	3	3	3	2	2	2	2	2	2	2	Okul dışından gelen öğretim üyeleri sanırım moodle kullanmakta zorlanıyor ve okuldan bağımsız şekilde kararlar alabiliyor. Bunu son dakikada öğrenmemiz bizim içinde dönemde çok zor oldu.	I think faculty members coming from outside the school have difficulty using moodle and can make decisions independently of the school. It was very difficult for us to learn this at the last minute.
4	4	4	4	4	4	4	4	4	4	4	4	4	4	4	4	Öğrettiğiniz her şey için çok teşekkür ederim, iyi tatiller dilerim hocam.	Thank you very much for everything you have taught me, I wish you a happy holiday, sir.
3	3	3	3	3	3	3	3	3	3	3	3	3	3	3	3	O	HE
4	4	4	4	4	4	4	4	4	4	4	4	4	4	4	4	KOLAYDI	IT WAS EASY
1	1	3	2	2	1	1	2	4	1	1	1	1	1	1	1	Derslerin genç hocalar tarafından daha interaktif şekilde işlenmesi gerekiyor. Dersler hayat hikayeleri dinlemekle ve eski kelimelerin anlamlarını araştırmakla geçti.	Lessons need to be taught more interactively by young teachers. Lessons were spent listening to life stories and researching the meanings of old words.
4	4	4	4	4	4	3	4	4	4	4	4	4	4	4	4	Öğretim elemanın düzenli ve programlı olması dersin verimliliğini arttırdı. Ancak konuların üzerinde biraz daha örnek verilmiş olsaydı daha anlaşılır bir ders olurdu.	The fact that the instructor was organized and scheduled increased the efficiency of the course. However, it would have been a more understandable lesson if some more examples had been given on the topics.
4	4	4	4	4	4	4	4	4	4	4	4	4	4	4	4	Haritalama tekniklerini öğrenerek ve grup çalışması yaparak dersin konularını iyi anladık.	We understood the course topics well by learning mapping techniques and doing group work.
3	2	4	4	4	4	2	4	4	4	4	4	4	4	4	4	ders öğretim elemanın bazı öğrencilere karşı davranışlarını uygun görmüyorum, daha destekleyici motivasyonu yükseltici, bu zor süreçte anlayışlı olmak gerektiğini düşünüyorum ancak böyle bir tavır göremedim	I do not find the instructor's behavior towards some students appropriate. I think it is necessary to be more supportive, motivating and understanding in this difficult process, but I have not seen such an attitude.
4	4	4	4	4	4	4	4	4	4	4	4	4	4	4	4	Her şey için çok teşekkür ederim grup olarak çok eğlendik. Ders bize çok şey kattı her şey için teşekkür ederiz.	Thank you very much for everything, we had a lot of fun as a group. The course helped us a lot, thank you for everything.
4	4	4	4	4	4	4	4	4	4	4	4	4	4	4	4	Vize sınavında moodle dan sınava girildiğinde sınavda süremden gitti her öğrenci gibi. Başka bir sıkıntı olmadı.	When I took the exam from moodle during the midterm exam, I lost my time in the exam, like every other student. There was no other problem.
4	4	4	4	4	4	4	4	4	4	4	4	4	4	4	4	her sey iyiydi	everything was fine
4	4	4	4	4	4	4	4	4	4	4	4	4	4	4	4	VERİMLİ BİR DERSTİ	IT WAS A PRODUCTIVE LESSON
4	4	4	4	4	4	4	4	4	4	4	4	4	4	4	4	Güzel ve verimli dersler için teşekkür ederim. Güzel bir dönemdi.	Thank you for the nice and productive lessons. It was a good time.
4	4	4	4	4	4	4	4	4	4	4	4	4	4	4	4	SAYIN HOCAM EMEKLERİNİZDEN DOLAYI TEŞEKKÜR EDERİM.	Dear Sir, I would like to THANK YOU FOR YOUR EFFORTS.
3	3	3	3	3	3	3	3	2	2	2	2	2	2	2	2	Çok tatlı bi öğretmen işini severek ve güzel yapıyor rahatlıkla dersini anlıyorum	She is a very sweet teacher, she loves her job and does it well. I can understand her lessons easily.
3	3	3	3	3	3	3	3	3	3	3	3	3	3	3	3	İçerik ve kazanımlar açısından verimli bir dersti . Bir sorun yaşamadım.	It was a productive course in terms of content and outcomes. I didn't have any problems.
4	4	4	4	4	4	4	4	4	4	4	4	4	4	4	4	Dersler verimliydi	The lessons were productive
1	1	1	1	1	1	1	1	1	1	1	1	1	1	1	1	Hocamızın alanında çok donanımlı olduğu belli ancak bunu öğrencilere aktaramıyor. Ders için kullanılan kitabın mevzuatla bir bağlantısı yok. Ders işlenişi yetersizdi. Sınavlarda tüm kitabı ve mevzuatı okumama rağmen ilk defa karşılaştığım şeyler oldu.	It is obvious that our teacher is very well-equipped in his field, but he cannot convey this to the students. The book used for the course has no connection with the legislation. The teaching of the lesson was inadequate. Even though I read the entire book and legislation during the exams, there were things I encountered for the first time.
4	3	3	3	3	3	3	3	3	3	3	3	3	3	3	3	iyi	Good
3	4	4	4	4	4	4	4	4	4	4	4	4	4	4	4	Dersi veren öğretim elemanı sınavlarla ilgili öğrenciye yapması gereken bilgilendirmeleri yapmıyor. Öğrencilerin elindeki mevzuat kriterlerine uymadığı için sınava 10 dakika kala mevzuat toplatıyor ancak olması gerekeni duyurmadığı için final sınavında öğrenciler mağdur edildi.	The instructor teaching the course does not inform the student about the exams. Since the students did not comply with the legislation criteria, the legislation was collected 10 minutes before the exam, but the students were victimized in the final exam because they did not announce what was required.
4	4	4	4	4	4	4	4	4	4	4	4	4	4	4	4	Herşey için teşekkür ederim	thank you for everything
4	4	3	3	3	3	4	4	4	2	2	2	2	2	2	2	ders içeriği çok güzeldi sadece bu dönemde olması biraz parçalanmasına neden oldu. çünkü beslenme değil de daha çok hastalık ağırlıklı bir dersti devam dersinin gelecek sene olması devamlılığı açısından kötü olmuş. sunumlar benim için çok güzeldi.esra hocadan aldığımız dönütler de çok güzeldi. sadece genel olarak bazı arkadaşların ödevlere veya derslere hazırlıksız yaklaşımından dolayı bizler ara…	The course content was very good, but the fact that it was in this period caused it to fall apart a bit. Because it was a disease-oriented course rather than nutrition, having the continuation course next year was bad for continuity. The presentations were very nice for me. The feedback we received from teacher Esra was also very nice. I just feel like we're stuck in the middle because of some fr…
4	4	4	4	3	4	3	4	4	2	2	2	2	2	2	2	emekleriniz için teşekkür ederim. çoğu notu açıklamadığınız için elimizde herhangi bir tahminde bulunabileceğimiz bir şey olmadı. dönem içinde verdiğiniz ödevlere dönüt vermeniz daha iyi olacaktır.	Thank you for your efforts. Since you didn't disclose most of the notes, we didn't have anything to make any predictions about. It would be better to give feedback on the homework you have given during the term.
3	3	3	3	3	3	3	3	3	3	3	3	3	3	3	3	Önerim yoktur.	I have no suggestions.
1	1	2	3	3	3	1	3	3	3	3	3	3	3	3	3	Dönemin ortasında hocamızın okuldan emekli olup ayrılması hepimizi zor duruma soktu. Hocamız ayrıldıktan sonrada hiç verimli ders işlenmedi. Dersimizin hocası olmadığı için şikayetlerimizi nereye yazacağımızı bilemedik ve yazdığımız hocamızda hiçbir dönüş sağlamadı. Bu dönem çok verimsiz geçirdiğimiz bir ders oldu.	Our teacher's retirement and departure from the school in the middle of the semester put us all in a difficult situation. After our teacher left, no productive lessons were taught. Since there was no teacher of our course, we did not know where to write our complaints, and the teacher we wrote to did not respond at all. This semester was a very unproductive course.
4	4	4	4	4	4	4	4	4	4	4	4	4	4	4	4	Her şey olumluydu, emeğinize sağlık.	Everything was positive, thank you for your efforts.
4	4	4	4	4	4	4	4	4	4	4	4	4	4	4	4	Değerli Öğretim Görevlimize bize kattığı değerli bilgiler ve öğrencilerine karşı özverili yaklaşımından dolayı şükranlarımı sunuyorum.	I would like to express my gratitude to our esteemed lecturer for the valuable information he provided us and his devoted approach towards his students.
3	4	4	4	4	4	4	4	4	3	3	3	3	3	3	3	hocamızın dersi biraz zor ancak emekleri için teşekkür ediyorum.	Our teacher's lesson is a bit difficult, but I thank him for his efforts.
3	3	3	3	3	3	3	3	3	3	3	3	3	3	3	3	Herşey gayet başarılıydı	Everything was very successful
4	4	4	4	4	4	4	4	4	4	4	4	4	4	4	4	İyi	Good
3	3	4	3	3	3	3	4	4	3	3	3	3	3	3	3	YOK kararlarina ragmen kayit alinmadi, dersin icerigine ve kazanimina gore fazla assignment verildigini dusunuyorum.	Despite the NO decisions, registration was not taken, I think that too many assignments were given according to the content and achievements of the course.
4	4	4	4	4	4	4	4	4	4	4	4	4	4	4	4	Hocamız cok iyi ?	Is our teacher very good?
2	2	2	2	2	2	2	2	2	2	2	2	2	2	2	2	yok	no
4	4	4	4	4	4	4	4	4	4	4	4	4	4	4	4	Derslerin işleyişi harika ama akıllı sistemler kullanılmalı	The functioning of the courses is great, but smart systems should be used
3	3	2	2	2	2	2	2	3	3	3	3	3	3	3	3	Geliştirilmesi gereken bir ders ve öğretim elemanı diye düşünüyorum.	I think it is a course and instructor that needs to be improved.
1	1	1	1	1	1	1	1	1	1	1	1	1	1	1	1	aldığım en saçma ders	Dumbest lesson I ever learned
4	4	4	4	4	4	4	4	4	4	4	4	4	4	4	4	Jghjh	Jghjh
3	3	3	3	3	3	3	3	3	3	3	3	3	3	3	3	Hj	hj
3	3	3	3	3	3	3	3	3	3	3	3	3	3	3	3	Vize için verilen ödev anlaşılması zor bir ödevdi, tartışma raporu nedir nasıl yazılır hakkında derste daha çok bilgilendirme yapılabilirdi. Ancak genel olarak güzel bir ders dönemi geçirildi.	The homework given for the midterm was difficult to understand. More information could have been given in the class about what a discussion report is and how to write it. But overall, it was a good semester.
3	3	3	3	3	3	3	3	3	3	3	3	3	3	3	3	Genel olarak güzeldi sadece bu dersin vizesi yapılmadığı için finalin %70 etkilemiş olması bizi çok zorladı keşke böyle olmasaydı.	In general, it was good, but the fact that the final had an impact of 70% because the midterm for this course was not completed made it very difficult for us. I wish it wasn't like this.
3	4	4	3	3	2	3	2	3	4	4	4	4	4	4	4	Bu ders gayet güzeldi.	This lesson was very good.
3	3	3	3	3	3	3	3	3	3	3	3	3	3	3	3	Derste işlenen reading , writing ve listening ağırlığı sınavdakiyle asla aynı değil. Sınavın daha zor olduğunu ve bizim ingilizce öğrenmek yerine bir sınavı ezberi yaptığımızı düşünüyorum. Bu da bence doğru eğitim değil. Eğer bir şeyler düzelecekse. Kitabın seviyesinde sınav hazırlanmasını ve hazırlığı geçmemizi zorlaştırmak yerine daha anlayışlı bir şekilde yardım etmenizi arz ederim	The emphasis on reading, writing and listening in the lesson is never the same as in the exam. I think the exam is harder and we memorize an exam instead of learning English. I think this is not the right education. If anything is going to get better. I would like you to help us in a more understanding way instead of making it difficult for us to prepare for the exam at the level of the book and …
4	4	4	4	4	4	4	4	4	4	4	4	4	4	4	4	değerli hocamızdan dersi aldığım için kendimi şanslı hissediyorum fakat dersi alttan aldığım için birkaç kez derse katılma fırsatım oldu hocamıza emekleri için çok teşekkür ederim	I feel lucky to have taken the course from our esteemed teacher, but since I took the course from the lower level, I had the opportunity to attend the course several times. I would like to thank our teacher very much for his efforts.
4	4	4	4	4	4	4	4	4	4	4	4	4	4	4	4	Öğretmeni çok seviyorum bizimle derslerde çok ilgilendi sınavlarım pek istediğim gibi olmadı ama çok düşük bi harf notuyla vermem umarım	I love the teacher very much. He was very interested in us in the lessons. My exams were not as I wanted, but I hope I don't give them a very low letter grade.
4	4	4	4	4	4	4	4	4	4	4	4	4	4	4	4	İlk modülde speaking puanı çok fazla	Speaking score is too high in the first module
4	4	4	4	4	4	4	4	4	4	4	4	4	4	4	4	Verimli bir dersti teşekkürler	It was a productive lesson, thank you.
4	4	4	4	4	4	4	4	4	4	4	4	4	4	4	4	Gayet iyi	pretty good
4	4	4	4	4	4	4	4	4	4	4	4	4	4	4	4	Ders amacına ulaştı	The lesson achieved its goal
3	3	3	3	3	1	1	3	3	3	3	3	3	3	3	3	Bu dersi geçmemiz için özellikle zor yapıyorlarmış gibi hissediyorum. Hangi öğrenci arkadaşımla konuşsam matematikten kaldığını zor olduğunu ve hiçbir şekilde geçme durumunun olmadığını söylüyor. Hoca derste hep bizi aşağılıyor. Bilmiyor olabiliriz, yapamıyor olabiliriz ama bu şekilde bir muamele görmek hoş değil. Hocamızın biraz yaşı var ve iletişim kuramıyoruz onunla. Bizim jenerasyonumuzu kabu…	I feel like they are making this class especially difficult for us to pass. Every student I talk to says that he/she failed math and that there is no way to pass. The teacher always humiliates us in class. We may not know, we may not be able to do it, but it is not nice to be treated this way. Our teacher is a little old and we cannot communicate with him. He does not accept our generation. Even …
4	4	4	4	4	4	4	4	4	4	4	4	4	4	4	4	Yapılan kısa sınavların(quiz) diğer gruplarla benzer olmasını tercih ederim. Aldığım duyuma göre diğer gruplardaki quizlerin soru çeşitliliği daha fazlaydı. Özetle, bir quizde de olsa trace sorusundan başka bir soru görmek isterdim. Onun dışında gayet olumlu bir deneyimdi.	I would prefer the quizzes to be similar to other groups. From what I heard, the question variety of the quizzes in other groups was more. In summary, I would like to see a question other than the trace question, even if it was in a quiz. Other than that, it was a very positive experience.
4	4	4	4	4	4	4	4	4	4	4	4	4	4	4	4	Final ve vize odevlerinde degerlendirme kriterleri yayinlansa daha iyi olurdu.	It would be better if the evaluation criteria for final and midterm assignments were published.
3	3	3	3	3	3	3	3	3	3	3	3	3	3	3	3	Bir önerim yok	I don't have a suggestion
3	3	3	3	3	1	1	4	3	1	1	1	1	1	1	1	Dersin tek bir dilde (İngilizce Türkçe geçişi olmadan) işlenmesi öğrencilerin adaptasyonu için çok daha faydalı olur. Sınavlar genel olarak çok zordu. Sedece bu dersten geçmek için diğer derslerimize birçok kişi olarak odaklanamadık. Derste kullanılan slaytlar yeterince bilgilendirici değildi.	Teaching the course in a single language (without switching from English to Turkish) would be much more beneficial for students' adaptation. The exams were generally very difficult. Many of us could not focus on our other courses just to pass this course. The slides used in the lecture were not informative enough.
4	4	4	4	4	4	4	4	4	4	4	4	4	4	4	4	Makale okunup makale sunulması çok iyi bir yaklaşım. Teşekkürler	Reading the article and presenting the article is a very good approach. Thanks
3	3	3	3	3	3	3	3	3	3	3	3	3	3	3	3	her şey yeterliydi teşekkürler	everything was enough thank you
4	4	4	4	4	4	4	4	4	4	4	4	4	4	4	4	dönem boyunca bu dersle ilgili bir sorun yaşamadım	I did not have any problems with this course throughout the semester.
3	3	3	3	3	3	3	3	3	3	3	3	3	3	3	3	ödevlerde yönergeleri daha açık ve anlaşılır bir şekilde verilirse daha kolay yapılabileceğini düşünüyorum.	I think homework can be done more easily if instructions are given more clearly and understandably.
3	3	3	3	3	3	3	3	3	3	3	3	3	3	3	3	teşekkürler	thanks
4	4	4	4	4	4	4	4	4	4	4	4	4	4	4	4	Ders içeri gayet yeterliydi. Hocamıza teşekkür ederim.	The course was quite sufficient. Thank you to our teacher.
4	4	4	4	4	2	4	4	4	4	4	4	4	4	4	4	Teşekkürler	Thanks
3	3	3	3	3	3	3	3	3	3	3	3	3	3	3	3	Yeterli olduğunu düşünüyorum	I think it's enough
4	4	4	4	4	4	4	4	4	4	4	4	4	4	4	4	Hocam her şey için çok teşekkür ederim, dinlemesi en ilgi çeken/ merak uyandıran İnkılap hocalarımdan oldunuz.	Teacher, thank you very much for everything, you have become one of the most interesting/intriguing Revolution teachers to listen to.
4	4	4	4	4	4	4	4	4	4	4	4	4	4	4	4	Hocama gayretlerinden dolayı teşekkürler	Thank you teacher for your efforts
4	4	4	4	4	4	4	4	4	4	4	4	4	4	4	4	Sıkılmadan ders işleniyordu. Ders notları açık ve anlaşılırdı. Öğretmenimizi başarılı buldum ben.	The lesson was taught without getting bored. Lecture notes were clear and understandable. I found our teacher successful.
4	4	4	4	4	4	4	4	4	4	4	4	4	4	4	4	Bu ders için genellikle benim görüşüm çok olumlu, hocamız çok bilgili ve iyi bir hocadır.	My opinion about this course is generally very positive, our teacher is very knowledgeable and a good teacher.
1	1	1	3	3	1	1	1	2	2	2	2	2	2	2	2	Dönem içerisinde ders sayısından kaynaklı kaybolmuş bir ders gibiydi. Laboratuvar çalışmaları çok keyifliydi. Ders daha anlaşılır bir içerikte olabilir, dağınıktı.	It was like a course that was lost due to the number of courses during the semester. Laboratory work was very enjoyable. The lesson could have had a more understandable content, it was messy.
4	4	4	4	4	4	4	4	4	4	4	4	4	4	4	4	Dersimi aldım ve teşekkür ederim	I learned my lesson and thank you
4	4	4	4	4	4	4	4	4	4	4	4	4	4	4	4	Dönem boyunca dersine severek girdiğim hocamız sayesinde çok güzel bir deneyim oldu	It was a great experience thanks to our teacher, whose lessons I enjoyed throughout the semester.
3	3	3	3	3	3	3	3	3	3	3	3	3	3	3	3	10 numara	number 10
4	4	4	4	4	4	4	4	4	4	4	4	4	4	4	4	teşekkürler	thanks
4	4	1	1	1	4	4	4	4	4	4	4	4	4	4	4	çok zor	very difficult
4	4	4	4	4	4	4	4	4	4	4	4	4	4	4	4	Değerli katkılarından ve vermiş olduğu emekten dolayı hocamıza teşekkürederim.Saygılar	I would like to thank our teacher for his valuable contributions and efforts. Best regards.
4	4	4	4	4	4	4	4	4	4	4	4	4	4	4	4	Ders çok verimli ve öğreticiydi. Normalde anlayamadığım bir dersi hocamızın harika anlatamıyla çok iyi anladım. Hocamıza çok teşekkür ediyorum.	The lesson was very productive and instructive. I understood very well a lesson that I normally could not understand, thanks to our teacher's wonderful explanation. I thank our teacher very much.
4	4	4	4	4	4	4	4	4	4	4	4	4	4	4	4	Bölümümüz ingilizce değilken slaytların ingilizce olması gereksizdi. Türkçe de anlatılabilirdi. İngikizce Kalması gereken terimler kalırdı onun dışındakiler türkçe olurdu. Çeviri yaparken zaman kaybedip bide anlamsız çıkan cümleleri kafam anlamlandırmaya uğraştım. Srs hazırlama projesinde ise hiç tecrübemiz olmadan yine ingilizce 500 sayfalık kaynaktan bakarak yapmamızı bekledi hocamız. Ve tabiki…	Since our department is not in English, it was unnecessary for the slides to be in English. It could also be explained in Turkish. The terms that needed to remain in English would remain, the rest would be in Turkish. I wasted time while translating and tried to make sense of the meaningless sentences. In the SRS preparation project, our teacher expected us to do it by looking at a 500-page sourc…
4	4	4	4	4	4	4	4	4	4	4	4	4	4	4	4	Dersin guruplar halinde işlenmesi çok iyidi onun dışında başka bir geri dönüşüm yok	It was very good that the lesson was taught in groups. Apart from that, there is no other feedback.
4	4	4	4	4	4	4	4	4	4	4	4	4	4	4	4	Muazzam bir akademisyen, yöntemi zorlayıcı ama çok geliştirici. Önemli tüm makaleleri okumaya mecbur kalıyorsunuz, ödevlerle de bunları içselleştiriyorsunuz.	He is a tremendous academician, his method is challenging but very developmental. You are forced to read all the important articles, and you internalize them through homework.
3	3	3	3	3	3	3	3	3	3	3	3	3	3	3	3	En son modülü geçip epe sınavında kalan öğrenciler için ayrı bir sınıf açılabilir o sınava yönelik.	A separate class can be opened for students who pass the last module and fail the EPE exam.
4	4	4	4	4	4	4	4	4	4	4	4	4	4	4	4	Sınavda sorulan sorular derste işlenilen sorulara göre daha zor hazırlanmıştı. Sınavda sorulan sorulara ilişkin yeterli soru çözülmedi ve hazırlık atlama sınavına yönelik bir çalışma yapılmadı.Hocalar ve kitaplar yararlıydı.	The questions asked in the exam were more difficult than the questions covered in class. Not enough questions regarding the questions asked in the exam were solved and no preparation work was done for the skip exam. The teachers and books were useful.
3	3	3	3	3	3	3	3	3	3	3	3	3	3	3	3	Vocab	vocab
4	4	4	4	4	4	4	4	4	4	4	4	4	4	4	4	Güzel	Beautiful
4	4	4	4	4	4	4	4	4	4	4	4	4	4	4	4	Ölçme ve Değerlendirme dersi zor derslerimizden biriydi. Ancak hocamızın bizler için oldukça anlaşılır bir dille anlattığını düşünüyorum. Alanımızdan örnekler de vererek süreci somutlaştırdı. Bence derslerimiz çok verimli ve güzel geçti. Dönem boyunca yaşadığımız en büyük sorun sınıflarımızda bulunan teknolojik donanımların ciddi anlamda yavaş çalışması oldu. Bu durum hocalarımızı epey zorladı.	Measurement and Evaluation course was one of our difficult courses. However, I think our teacher explained it in a very understandable language for us. He concretized the process by giving examples from our field. I think our lessons were very productive and good. The biggest problem we experienced throughout the semester was that the technological equipment in our classrooms worked seriously slo…
4	4	4	4	4	4	4	4	4	4	4	4	4	4	4	4	dersin içeriğinden ve hocamdan çok memnunum ama bilgisayar konusunda gerçekten başarısızım	I am very pleased with the content of the course and my teacher, but I am really bad at computers.
4	4	4	4	4	4	4	4	4	4	4	4	4	4	4	4	yok	no
4	4	4	4	4	4	4	4	4	4	4	4	4	4	4	4	Yok.	No.
4	4	4	4	3	4	4	4	4	4	4	4	4	4	4	4	Konumuzu kapsayan ve sıklıkla kullanacağımız pek çok deneyi yapmış olmak benim açımdan çok faydalıydı. Ayrıca deneylerden sonra yazılan raporlar ve yapılan araştırmalar da öğrenmeme ders sunuları kadar yardımcı oldu. Keşke başarısız olunan deneylerin tekrarlanma şansı olsaydı ya da birtakım teknikleri herkes deneyebilseydi. Ama sınıf mevcudu ve malzemelerin el verdiğince gayet yeterli bir laborat…	It was very useful for me to conduct many experiments that cover our subject and that we will use frequently. In addition, the reports written after the experiments and the research conducted helped me learn as much as the lecture presentations. I wish there was a chance to repeat failed experiments or if everyone could try some techniques. But it was a very adequate laboratory course, as far as …
2	2	2	2	2	2	2	2	2	2	2	2	2	2	2	2	Güzel	Beautiful
2	4	4	4	4	1	4	4	4	4	4	4	4	4	4	4	konuşması anlaşılır değil	his speech is not understandable
4	4	4	4	4	4	4	4	4	4	4	4	4	4	4	4	Çok iyiydi bi sıkıntı yok	It was very good, no problems
4	4	4	4	4	4	4	4	4	4	4	4	4	4	4	4	Öğretim hocamız detaylı şekilde kaynaklardan işleyip bilgilendirdi.	Our instructor explained and informed us in detail from the sources.
4	4	4	4	4	4	4	4	4	4	4	4	4	4	4	4	DERS İÇERİĞİNİN YOĞUN VE AKTİF BİR PROGRAM OLMASINA RAĞMEN HOCAMIN DERSLERİ ÇOK AKTİF BİR ŞEKİLDE İŞLEMESİ, ANLAMAM İÇİN BAZEN DEFALARCA TEKRAR ETMESİ, İÇERİKLER HAKKINDA ÇOK DONANIMLI OLMASI BENİM İÇİN DERSİ KOLAYLAŞTIRDI	EVEN THOUGH THE COURSE CONTENT WAS AN INTENSIVE AND ACTIVE PROGRAM, THE COURSE WAS EASIER FOR ME THAT MY TEACHER PROVIDED THE LESSONS IN A VERY ACTIVE WAY, SOMETIMES REPEATED THE COURSES OVER AND OVER FOR ME TO UNDERSTAND, AND HE WAS VERY EQUIPPED ABOUT THE CONTENT.
4	4	4	4	4	4	4	4	4	4	4	4	4	4	4	4	Hocamın verdiği bilgiler için, teşekkür ediyorum.	Thank you for the information given by my teacher.
4	4	4	4	4	4	4	4	4	4	4	4	4	4	4	4	Teşekkür ederim	Thank you
4	4	4	4	4	4	4	4	4	4	4	4	4	4	4	4	Güzel bir dersti hocamız çok güzel anlattı ve iyi ilgilendi.	It was a good lesson, our teacher explained it very well and took good care of it.
4	4	4	4	4	4	4	4	4	4	4	4	4	4	4	4	Güzel bir dersti hocamız güzel anlattı	It was a good lesson, our teacher explained it well.
4	4	3	4	4	3	3	3	4	3	3	3	3	3	3	3	Çok iyi.Teşekkürler.	Very good. Thank you.
4	3	4	3	3	4	4	3	4	3	3	3	3	3	3	3	gayet iyi	pretty good
4	4	4	4	4	4	4	4	4	4	4	4	4	4	4	4	teşekkürler	thanks
1	1	1	1	2	2	2	2	1	1	1	1	1	1	1	1	Doğru düzgün hiç ders yapamadık. Vize konuları bize söylenen ile çok farklıydı. Fayda sağlayan hiçbir şey olmadı.	We couldn't do any proper lessons. Visa issues were very different from what we were told. Nothing helpful happened.
3	3	3	3	3	3	3	3	3	3	3	3	3	3	3	3	Verimliydi	It was productive
3	2	3	3	2	2	2	3	3	2	2	2	2	2	2	2	Der işleyişinde ders konusu dışındaki konulara daha az değinilerek dersin içeriğine daha fazla zaman ayrılmalı ve örnek çözülmesi gereken konularda daha fazla örnek çözülerek öğrenim pekiştirilmelidir.	During the course, more time should be devoted to the content of the course by touching on topics outside the course subject less, and learning should be reinforced by solving more examples on subjects that need to be solved.
4	4	4	4	4	4	4	4	4	4	4	4	4	4	4	4	Dersimizi anlama açımızdan öğretmenimizin çok katkısı ve etkisi oldu gayet güzel bir dönem geçirdik teşekkürler.	Our teacher contributed a lot and had an impact on our understanding of the lesson, we had a very good semester, thank you.
4	4	4	4	4	4	4	4	4	4	4	4	4	4	4	4	Dersin hocasından çok memnunum son derece faydalı derslerdi	I am very pleased with the instructor of the course. The courses were extremely useful.
4	4	4	4	4	4	4	4	4	4	4	4	4	4	4	4	Ders ve destek konusunda hocamız çok iyiydi	Our teacher was very good in terms of lessons and support.
4	4	3	4	4	3	3	4	4	4	4	4	4	4	4	4	Her şey gayet yeterliydi	Everything was fine
3	3	3	3	3	3	3	3	3	3	3	3	3	3	3	3	İyi	Good
4	4	4	4	4	4	4	4	4	4	4	4	4	4	4	4	Aaa	Ahh
4	4	4	4	4	4	4	4	4	4	4	4	4	4	4	4	Hocam mesleğinizi o kadar çok severek yapıyorsunuz ve o kadar çok içselleştirmişinizki bunu hangi güzel sözle ifade edebilirim bilmiyorum . Hocam tüm hayatınızda sağlık ve başarılar diliyorum .	Sir, you love your job so much and you have internalized it so much that I don't know how to express it with beautiful words. Sir, I wish you health and success in your entire life.
4	4	4	4	4	4	4	4	4	4	4	4	4	4	4	4	ma csew	ma csew
2	2	2	2	2	2	2	2	2	3	3	3	3	3	3	3	tecrübeli ve bilgili biri	someone who is experienced and knowledgeable
4	4	4	4	4	4	4	4	4	4	4	4	4	4	4	4	herşey anlaşılır ve güzeldi	everything was understandable and beautiful
4	4	4	4	4	4	4	4	4	4	4	4	4	4	4	4	Her şey için teşekkürler hocam	Thank you for everything, sir.
4	4	4	4	4	4	4	4	4	4	4	4	4	4	4	4	VERİMLİ BİR DERSTİ	IT WAS A PRODUCTIVE LESSON
3	3	3	3	3	2	2	3	2	2	2	2	2	2	2	2	Öğrencilerle daha etkili konuşma etkileşim halinde dersler işlense çok daha verimli olur. Derste biz öğrenciler olarak dönem boyunca hiç keyif alamadığımızı ve dersten koptuğumuzu söyleyebilirim. Umarım öğretim görevlisi bundan sonraki senelerde daha dikkatli olur.	It would be much more productive if lessons were taught in more effective conversation and interaction with students. I can say that we, as students, did not enjoy the course at all throughout the semester and were disconnected from the course. I hope the lecturer will be more careful in the coming years.
3	3	3	3	3	3	3	3	3	3	3	3	3	3	3	3	İyi	Good
2	2	1	1	1	1	1	2	2	2	2	2	2	2	2	2	Hocamızın katkılarından dolayı teşekkür ederim fakat stüdyod ailk 6 haftada neredeyse proje oturmadı ve hocamız hiç yapıcı değildi demorolize bir şekilde derslere katıldıkve istekli değildik	I thank our teacher for his contributions, but in the first 6 weeks of the studio, the project almost did not work out and our teacher was not constructive at all. We attended the classes in a demoralized manner and were not willing.
3	3	3	3	3	3	4	4	4	3	3	3	3	3	3	3	öğretici bir dersti kendimi geliştirebilmeme olanak sağladı	It was an instructive lesson and allowed me to improve myself.
4	4	4	4	3	4	3	4	4	4	4	4	4	4	4	4	Emeğiniz için teşekür ederim ?	Thank you for your effort.
4	4	4	4	4	4	4	4	4	4	4	4	4	4	4	4	Değerli hocam, derste iken kendimi YouTube'da ders videosu izler gibiydim. Çok güzel anlatıyorsunuz ama tek sıkıntı YouTube'daki gibi sizi durdurma veya geri alma opsiyonumuzun olmaması. Katkılarınız için teşekkür ederim.	Dear teacher, while I was in class, I felt like I was watching lecture videos on YouTube. You explain it very well, but the only problem is that we do not have the option to stop or rewind you like on YouTube. Thank you for your contributions.
3	3	3	3	3	3	3	3	3	3	3	3	3	3	3	3	Ders verimliydi	The lesson was productive
4	4	4	4	4	4	4	4	4	4	4	4	4	4	4	4	Dersimiz günü gününe saati saatine dolu dolu işlendi içeriği genişti hocamızın anlatımları için teşekkür ediyorum	Our lesson was taught day by day, hour by hour, the content was extensive, I thank our teacher for his explanations.
3	3	3	3	3	3	3	3	3	3	3	3	3	3	3	3	S	S.
1	1	1	1	1	1	1	1	1	1	1	1	1	1	1	1	dersin online olması sınavların yüz yüze olması kötü.	It is bad that the course is online and the exams are face to face.
4	4	4	4	4	4	4	4	4	4	4	4	4	4	4	4	her şey için teşekkürler sayın hocam	Thank you for everything dear sir.
3	3	3	3	3	3	3	3	3	3	3	3	3	3	3	3	Dersimizi hocamız ayrıntılı bir şekilde anlattı	Our teacher explained our lesson in detail.
4	4	4	4	4	4	4	4	4	4	4	4	4	4	4	4	Hocamızın ders işleyişi, bilgilerini aktarışı çok iyi olsada sınavlarda özellikle yazılı olan sınavların çok zor olduğunu düşünüyorum	Although our teacher teaches very well and conveys his knowledge, I think the exams, especially the written ones, are very difficult.
4	4	4	4	4	4	4	4	4	4	4	4	4	4	4	4	Dersin kapsamı ve içeriği çok iyi hazırlanmıştı, geribildirim üzerine kurulmuş ders sistemi de benim için çok faydalı oldu. Derste işlenen konuların örnekler üzerinden götürülmesi de konuları pekiştirmek için çok kıymetliydi. Hocamızın deneyimleri ve bilgilerini aktarması da anlaşılabilir ve basitleştiriciydi. Çok güzel bir ders döenmi geçirdim, tüm emekleriniz için teşekkürler.	The scope and content of the course were very well prepared, and the course system based on feedback was also very useful for me. It was also very valuable to explain the topics covered in the course through examples to reinforce the topics. Our teacher's transfer of his experiences and knowledge was also understandable and simplifying. I had a great teaching term, thank you for all your efforts.
3	3	3	3	3	3	3	3	3	3	3	3	3	3	3	3	teşekkürler	thanks
3	3	3	3	3	3	3	3	3	3	3	3	3	3	3	3	Güzeldi	it was nice
4	4	4	4	4	4	4	4	4	4	4	4	4	4	4	4	Memnundum bir sorun yaşanmadı	I was satisfied, no problems occurred
4	4	4	4	4	4	4	4	4	4	4	4	4	4	4	4	Dersin içeriği ve işleyişi çok iyiydi. Dersi anlatan öğretim görevlisi de çok akıcı bir şekilde ders işledi.	The content and process of the course were very good. The lecturer who taught the course taught very fluently.
4	4	4	4	4	4	4	4	4	4	4	4	4	4	4	4	İyiydi hocama teşekkür ederim.	It was good, thank you teacher.
4	4	4	4	4	4	4	4	4	4	4	4	4	4	4	4	İyi	Good
3	3	3	3	1	1	3	3	3	3	3	3	3	3	3	3	Derste anlatılan dersi anlayamıyoruz. İletişim sıkıntısı yaşıyoruz.	We cannot understand the lesson taught in class. We are having a communication problem.
2	1	1	1	1	2	2	2	1	1	1	1	1	1	1	1	Sınavda işlenmeyen konuları soran bir hocamız. Hukuk değil tıp fakültesi olduğunu düşündü galiba buranın, canı sağolsun.	A teacher who asks about topics not covered in the exam. I guess he thought this was a medical school, not a law school, thank God.
4	4	4	4	4	4	4	4	4	4	4	4	4	4	4	4	Zor ve yoğun bir dersti.	It was a difficult and intense course.
4	4	4	4	4	4	4	4	4	4	4	4	4	4	4	4	Gayet yeterli ve güzeldi.	It was quite sufficient and beautiful.
1	1	1	1	1	1	1	1	1	1	1	1	1	1	1	1	Kötü bir deneyimdi	It was a bad experience
1	1	1	1	1	1	1	1	1	1	1	1	1	1	1	1	Dersin öğretim elemanı kesinlikle yetersizdi. Öğrencilerle hiçbir şekilde ilgilenmiyor, ilgilendiğinde de sert ve negatif bir tutum sergiliyordu. Kesinlikle kendisine hiçbir saygım ve iyi düşüncelerim yok. Okulumuzda ders vermeye kapasitesinin yeterli olduğunu hiçbir şekilde düşünmüyorum.	The instructor of the course was definitely incompetent. He was not interested in the students at all, and when he did, he had a harsh and negative attitude. I have absolutely no respect or good thoughts for him. I don't think he has enough capacity to teach at our school.
4	4	2	4	4	4	4	4	4	4	4	4	4	4	4	4	Ben dersin hocasından ve anlatımından çok memnun kaldım.	I was very pleased with the instructor and his explanation of the course.
4	4	4	4	3	3	3	4	4	4	4	4	4	4	4	4	Güzel bir dönemdi	It was a good time
2	3	4	3	3	3	3	4	4	4	4	4	4	4	4	4	Öğretim görevlisinin derse olan hakimiyetini bilgi düzeyinden herhangi bir şüphemiz yok fakat öğrencilere karşı kullandığı üslüb kabul edilemez, kendi akademik başarılarını anlatarak öğrencileri aşşağılaması kabul edilemez, öğrenciler derse katılmaktan hocanın davranışları yüzünden çekiniyor bu çok üzücü birşey.	We have no doubt about the instructor's command of the course and his level of knowledge, but the tone he uses towards the students is unacceptable, it is unacceptable for him to humiliate the students by talking about his own academic achievements, students are afraid to attend the lecture because of the instructor's behavior, this is a very sad thing.
3	3	3	3	3	3	3	3	3	3	3	3	3	3	3	3	iyi	Good
1	1	1	1	1	1	1	1	1	1	1	1	1	1	1	1	Berbat bir anlatım, derse karşı 0 alaka, büyük ciddiyetsizlik.	Terrible explanation, 0 interest in the course, great lack of seriousness.
4	4	4	4	4	4	4	4	4	4	4	4	4	4	4	4	Yaptığımız araştırmalar ile slaytlar hazırladık size rapoelar sunduk .Açıkçası konum bana biraz sıkıcı geldi o yüzden hazırlık aşwmasında zorlandım.	We prepared slides based on our research and presented reports to you. Frankly, the topic seemed a bit boring to me, so I had a hard time with the preparation.
3	2	2	2	2	2	3	3	3	3	3	3	3	3	3	3	Bölümümüz kapsamında çok önemli olan bu dersimizin kapsamında bulunun tüm konular hakkında geniş çaplı bilgi sahibi olacağım şeklinde bir düşünceyle döneme başlamıştım fakat slaytların yetersizliği ve hocamızın ders işleyiş yönteminin bizim için pek açık olmamasından kaynaklı sınıf olarak yeterli bilgi düzeyine ulaştığımızı düşünmüyorum.	I started the semester with the idea that I would have extensive knowledge about all the subjects covered by this course, which is very important for our department, but I do not think that we have reached the sufficient level of knowledge as a class due to the inadequacy of the slides and the fact that our teacher's teaching method is not very clear to us.
1	2	2	1	1	1	1	1	2	1	1	1	1	1	1	1	Hoca dersine girmememize rağmen neredeyse hiç bir konu işlemedi dönem başındaki slaytlar dışında hiç vize sonrası yeni bir slayt işlemedi veya tekrar etmemiz için slaytları yüklemedi hiç bir ders konusu anlamadım ve muhtemelen bundan dolayı dersten kaldım kendisi öysde hiç bir şey açmadı ondan dolayı hiç bir slayttı ders işledikten hemen sonra ya da yakın bir zamanda göndermedi vize öncesi konula…	Even though we did not attend the lecture, the teacher taught almost no subject. Except for the slides at the beginning of the semester, he did not process a new slide after the midterm or did not upload the slides for us to repeat. I did not understand any of the lecture topics and that is probably why I failed the course. He did not open anything in the semester, that is why he did not open any…
4	4	4	4	4	4	4	4	4	4	4	4	4	4	4	4	Dersimiz içerik bakımından yoğun ve zorlu bir dersti ancak verimli olduğunu düşünüyorum. Hocamıza bize olan katkılarından dolayı teşekkür ediyorum.	Our course was an intense and challenging course in terms of content, but I think it was productive. I would like to thank our teacher for his contributions to us.
4	4	4	4	4	4	4	4	4	4	4	4	4	4	4	4	Ok güzel bir dönem geçirdik sene başında çok korkmuştum ama çok keyif aldım derslerimizden .Emekleriniz için teşekkür ederim hocam.	Ok, we had a good semester. I was very scared at the beginning of the year, but I enjoyed our lessons very much. Thank you for your efforts, teacher.
4	4	4	4	4	4	4	4	4	4	4	4	4	4	4	4	Dönem boyuncu derslerimizi çok keyifli ve öğretici bir şekilde geçirdim.	I had a very enjoyable and instructive course throughout the semester.
4	4	4	4	4	4	4	4	4	4	4	4	4	4	4	4	Hocamıza bize olan katkılarından dolayı teşekkür ediyorum.	I would like to thank our teacher for his contributions to us.
4	4	4	4	4	4	4	4	4	4	4	4	4	4	4	4	TEŞEKKÜR EDERİZ	THANK YOU
4	4	4	4	4	4	4	4	4	4	4	4	4	4	4	4	ödevlerle ilgili geri bildirim alcak çok daha verimli olabilir onun dışında çok verim bir ders ve dönemdi çok teşekkürler.	It would be much more productive to get feedback on the assignments. Apart from that, it was a very productive course and semester, thank you very much.
4	4	4	4	4	4	4	4	4	4	4	4	4	4	4	4	Materyalinden ders saatine ve öğretimine kadar mükemmel bir ders	An excellent course, from the material to the course time and teaching.
4	4	4	4	4	4	4	4	4	4	4	4	4	4	4	4	Hocamız tecrübeli ve verimli dersler işledi	Our teacher was experienced and taught efficient lessons.
2	2	2	1	2	1	4	3	3	3	3	3	3	3	3	3	verilen ödevlerle ders içeriğinin hiçbir alakası yoktu ödevler çok zordu ve derste işlediğimiz konularla alakalı değildi.	The course content had nothing to do with the assignments given. The assignments were very difficult and were not related to the topics we studied in the course.
4	4	4	4	4	4	4	4	4	4	4	4	4	4	4	4	Hocamız iyi ki var. çok sevgiler selamlar saygılar... her şey için çok teşekkür ederiz bal hocam.	It's a good thing we have a teacher. Much love, greetings, respect... Thank you very much for everything, honey teacher.
4	4	4	4	4	4	4	4	4	1	1	1	1	1	1	1	Bu dersin öğretim elemanı derse ayrılan zamanı etkili kullanamıyor. Genellikle dersin başında öğrencilerden gelen soruları veya başka şeyleri cevaplandırdığı için derse başlaması biraz uzun sürüyor.	The instructor of this course cannot use the time allocated to the course effectively. It usually takes a while for him to start the lesson because he is answering questions or other things from the students at the beginning of the lesson.
4	4	4	4	4	4	4	4	4	4	4	4	4	4	4	4	Her şey çok güzeldi. Çok teşekkürler	Everything was beautiful. Thanks a lot
1	1	1	1	1	1	1	1	1	1	1	1	1	1	1	1	Ders içeriğine dair bilgi edimimin tam olmadığını düşünüyorum	I think my knowledge of the course content is not complete.
4	4	4	4	4	4	4	4	4	4	4	4	4	4	4	4	Bölümün en iyi hocası adam yürüyen iktisat.	The best teacher of the department is a walking economics man.
2	2	2	2	2	2	2	2	2	2	2	2	2	2	2	2	Hocamızın konulardan konulara atlayışından dolayı dersi anlamakta sorun yaşadım. Dersin içeriğini kendim çalışmasam asla anlamayacaktım. Hocamız bizim bu dili ilk defa öğrendiğimizi unuttu büyük ihtimalle. Gastronomi ile olan karmadan dolayı da genellikle onlara yönelik olarak ders ilerledi kısaca Amerikan Kültür ve Edebiyatı bölümünü geride bırakıldı. Sınavlarımızın da farklı sınıflarda ve farkl…	I had trouble understanding the lesson because our teacher jumped from topic to topic. I would never understand the content of the course if I didn't study it myself. Our teacher probably forgot that we learned this language for the first time. Due to the combination with gastronomy, the course generally focused on them, and in short, the American Culture and Literature department was left behind…
4	4	4	4	4	4	4	4	4	4	4	4	4	4	4	4	Öğretim elemanın bilgi ve tecrübesi, aktif sektör çalışanı olması motivasyon anlamında katkı sağlamıştır. Teşekkür ederim.	The knowledge and experience of the faculty member and the fact that he is an active sector employee contributed to motivation. Thank you.
2	2	3	2	2	2	2	2	2	2	2	2	2	2	2	2	Derse ilişkin devamsızlık bilgileri sisteme girilmedi ve bu konuda geri dönüş istediğimizde yapılmadı. Ders hep slaytlar okunarak işlendi ve ekstra bir bilgi verilmedi. Slaytlar çok yoğundu ders saatine göre	Absence information regarding the course was not entered into the system and when we requested feedback on this issue, it was not provided. The lesson was taught by reading the slides and no extra information was given. The slides were too intense for the class time.
3	3	3	3	3	4	3	4	4	3	3	3	3	3	3	3	Final sınavı dönem içinde anlatılanlara göre daha zor sorular içeriyordu. 3 konudan soru vardı, diğer konu ve ünitelerden de soru olmasını beklemekteydik. Onun dışında iyi bir ders süreci geçirdik.	The final exam contained more difficult questions than those covered during the semester. There were questions from 3 subjects, we expected there to be questions from other subjects and units as well. Other than that, we had a good course.
4	4	4	4	4	4	4	4	4	4	4	4	4	4	4	4	Katkılarınız için teşekkür ederim.	Thank you for your contributions.
3	3	3	3	3	3	3	3	3	3	3	3	3	3	3	3	Staja ve bazı sınıfta yapılan uygulamalara gerek olmadığını düşünüyorum. 3. Sınıfın içeriğine uygun olmadığını düşünüyorum. Karmaşıkla beraber çok yoğun geldi.	I think there is no need for internship and some classroom practice. I think it is not suitable for the content of the 3rd grade. It seemed very intense along with the complex.
2	2	2	2	2	2	2	2	2	2	2	2	2	2	2	2	Makaleyi deftere yazma gibi bir ödev olmamalıydı	There shouldn't be an assignment like writing the article in a notebook.
3	3	3	3	3	3	3	3	3	3	3	3	3	3	3	3	Verimli bir yıl değildi males okula gidemediğimiz için	It wasn't a productive year, unfortunately because we couldn't go to school.
4	4	4	4	4	4	4	4	4	4	4	4	4	4	4	4	ders iyide ezber çok	Lessons are good, but there is a lot of memorization
3	3	3	3	3	3	3	3	3	3	3	3	3	3	3	3	yok	no
1	1	1	1	1	1	1	1	1	1	1	1	1	1	1	1	ghj	ghj
4	4	4	4	4	4	4	4	4	4	4	4	4	4	4	4	Rol oynamalar geri bildirimler ders içi kazanımlar videolara her şey çok güzeldi teşekkür ederim.	Role plays, feedback, in-class achievements, videos, everything was great, thank you.
2	2	2	2	2	2	2	2	2	2	2	2	2	2	2	2	Kullanılan materyaller yeterliydi. Ders sorumlumuz öğrencileriyle ilgiliydi. Genel olarak verimli bir dönemdi.	The materials used were sufficient. Our lecturer was concerned about his students. Overall, it was a productive period.
3	3	3	3	3	3	3	3	3	3	3	3	3	3	3	3	İYİ	GOOD
4	4	4	4	4	4	4	4	4	4	4	4	4	4	4	4	harika bir dönem ve nitelikli bir dersti	It was a great semester and a quality course.
4	4	4	4	4	4	4	4	4	4	4	4	4	4	4	4	Çok güzel bir dönemdi öğretim elemanımız çok ilgiliydi	It was a very nice semester, our instructor was very caring.
4	4	4	4	4	4	4	4	4	4	4	4	4	4	4	4	Konular eğlenceliydi yüz yüze olmasını isterdim	The topics were fun, I wish it was face to face.
3	3	3	3	3	3	3	3	3	3	3	3	3	3	3	3	yok	no
4	4	4	4	4	4	4	4	4	4	4	4	4	4	4	4	Yok	None
4	4	4	4	4	4	4	4	4	4	4	4	4	4	4	4	Dersin her dakikası mı öğretici olur oluyormuş çok güzel öğrendik harika bir dönemdi herşey için teşekkür ederim	We learned very well that every minute of the lesson was instructive, it was a wonderful semester, thank you for everything.
3	3	3	3	3	3	3	3	3	3	3	3	3	3	3	3	Yok	None
4	4	4	4	4	4	4	4	4	4	4	4	4	4	4	4	Oldukça iyi bir hoca	He's a pretty good teacher.
4	4	4	4	4	4	4	4	4	4	4	4	4	4	4	4	yok	no
3	4	4	4	4	3	3	3	3	3	3	3	3	3	3	3	Güzel.	Beautiful.
4	4	4	4	4	4	4	3	3	3	3	3	3	3	3	3	Kolay verimli ders	Easy productive lesson
4	4	4	4	4	4	4	4	4	4	4	4	4	4	4	4	Ders ile ilgili ilk başlarda kararsızdım ve beklediğim gibi çıkmaz diye korktum zorlanırım sandım ama gayet keyifli ve kendime bişeyler katabildiğim bir ders oldu bu derdi aldığım için çok mutluyum	I was hesitant about the course at first and I was afraid that it would not turn out as I expected, I thought I would have difficulty, but it was a very enjoyable course and I could add something to myself. I am very happy that I took this course.
3	3	3	3	3	3	3	3	3	3	3	3	3	3	3	3	U	u
4	4	4	4	4	4	4	4	4	4	4	4	4	4	4	4	Ders işleyiş tarzını çok beğendim. Her şey açık ve netti.	I really liked your teaching style. Everything was clear and crisp.
4	4	4	4	3	4	4	4	4	4	4	4	4	4	4	4	her şey güzel ve anlaşılırdı	everything was nice and understandable
3	3	3	3	3	3	3	3	3	3	3	3	3	3	3	3	Verimli ders işleyişi	Efficient course execution
4	4	4	4	4	4	4	4	4	4	4	4	4	4	4	4	İyi	Good
3	3	3	3	3	3	3	3	3	3	3	3	3	3	3	3	Teşekkür ederim her şey için hocam	Thank you for everything sir
1	1	1	1	1	1	1	1	1	1	1	1	1	1	1	1	Çok zayıftı. Öğretim elemanı yardımcı olmadı hiç bir konuda. Hocaların yanlış yönlendirmesi üzerine bizden not kırıldı. Bunun üstüne de hiç yardımcı olmadılar.	He was very weak. The instructor did not help with anything. Due to the misdirection of the teachers, our grade was deducted. They didn't help at all on top of that.
2	2	2	2	2	2	2	2	2	2	2	2	2	2	2	2	Gerçekten akademisyenlerin anlatıldığı bir ders olmasını isterdim slayt okuyuculuğı değil . Youtubedan aynı eğitimi alabilirim	I really wish it was a course where academics were taught, not slide reading. I can get the same training from YouTube
4	4	4	4	4	4	4	4	4	4	4	4	4	4	4	4	Yok	None
4	4	4	4	4	4	4	4	4	4	4	4	4	4	4	4	Kendime örnek aldığım öğretmendir.	He is the teacher I take as an example for myself.
3	3	3	3	3	3	3	3	3	3	3	3	3	3	3	3	Güzeldi teşekkürler	It was nice thank you
4	4	4	4	4	4	4	4	4	4	4	4	4	4	4	4	Sayın hocamızın çok iyi bir anlatım yöntemi ve dili var, böyle genç hocalardan ders almayı her zaman istiyorum. Kürsüde böyle hocalar görmek beni çok sevindiriyor.	Our esteemed teacher has a very good explanation method and language, I always want to take lessons from such young teachers. It makes me very happy to see such teachers at the podium.
2	2	3	3	3	2	2	3	3	3	3	3	3	3	3	3	Online eğitimde sadece pdf teki notlar üzerinden dersin anlatılması bana hiç bir şey katmadı. Belirli süreden sonra derslere girmemeye başladım çünkü öğretim elemanının anlatımı anlaşılır değildi ve derslerin bana bir katkısı olmuyordu. Yüz yüze eğitimde de öğrencilerle iyi geçinebilen biri olduğunu düşünmüyorum. Çünkü çok stabil fikirlerle hareket ediyor ve iletişimi gerçekten kötü.	In online education, teaching the course only through notes in PDF did not add anything to me. After a certain period of time, I stopped attending classes because the instructor's explanation was not understandable and the classes did not contribute to me. I don't think he is someone who can get along well with students in face-to-face education. Because he acts with very stable ideas and his com…
1	1	1	1	1	1	1	1	1	1	1	1	1	1	1	1	Ders anlatımı başarılı değildi konulara hakim olamadık soru çözümü yapılmadı	The lecture was not successful, we could not master the topics, the questions were not solved.
3	3	3	3	3	3	3	3	3	3	3	3	3	3	3	3	Yok	None
4	4	4	4	4	4	4	4	4	4	4	4	4	4	4	4	Gerçekten güzel ders anlatan bilgili bir hoca	He is a knowledgeable teacher who gives really good lessons.
4	4	4	4	4	4	4	4	4	4	4	4	4	4	4	4	Zor bir dönemdi depremin yaşanması tüm ülkeyle birlikte öğrencilerin adapte oluşunu da etkiledi,okulların bir online bir yüzyüze olmasından kaynaklı çok odaklanamadım. Hocamızın iletişimi gayet uyumlu ve teşvik ediciydi.	It was a difficult time. The earthquake affected the adaptation of the students as well as the whole country. I could not focus much because the schools were online and face to face. Our teacher's communication was very harmonious and encouraging.
3	3	3	3	3	3	3	3	3	4	4	4	4	4	4	4	Uzaktan eğitimde bu dersin anlaşılır olduğunu düşünmüyorum.	I do not think this course is understandable in distance education.
2	2	2	2	1	2	1	2	1	3	3	3	3	3	3	3	Kesinlikle öğrenciyi merkeze alan bir eğitim anlayışını benimsemeden dersleri yürütüyor. Kendi işine ne kolay gelirse bizim öğrenip öğrenmeyeceğimizi veya faydalanıp faydalanmayacağımızı düşünmeden hareket ederek saçma sapan bizim faydalanamayacağımız görevler vererek günü geçirmeye çalışıyor. Ayrıca elinde notlar olmadan ne anlatabileceğini bilemiyorum çünkü elinde not olsa bile doğru bilgiyi ve…	He conducts classes without adopting an education approach that puts the student at the center. He tries to pass the day by giving ridiculous tasks that we cannot benefit from, acting without thinking about whether we will learn or benefit from them, whatever is easier for him. Moreover, I do not know what he can explain without notes, because even if he has notes, he cannot give the correct info…
4	4	4	4	4	4	4	4	4	4	4	4	4	4	4	4	dönemin online olmasından dolayı yaşanan aksaklıklar ve zorlukların farkındayım ama, kopya çeken olmasın diye sınavın ekstra zor yapılması bir önlem hali oluşturmadı. kopya çeken her şekilde çekti	I am aware of the disruptions and difficulties experienced due to the semester being online, but making the exam extra difficult to avoid cheating was not a precaution. The one who cheated cheated in every way
2	2	2	3	3	2	1	2	2	3	3	3	3	3	3	3	Kesinlikle öğrenciyi merkeze alan bir eğitim anlayışını benimsemeden dersleri yürütüyor. Kendi işine ne kolay gelirse bizim öğrenip öğrenmeyeceğimizi veya faydalanıp faydalanmayacağımızı düşünmeden hareket ederek saçma sapan bizim faydalanamayacağımız görevler vererek günü geçirmeye çalışıyor. Ayrıca elinde notlar olmadan ne anlatabileceğini bilemiyorum çünkü elinde not olsa bile doğru bilgiyi ve…	He conducts classes without adopting an education approach that puts the student at the center. He tries to pass the day by giving ridiculous tasks that we cannot benefit from, acting without thinking about whether we will learn or benefit from them, whatever is easier for him. Moreover, I do not know what he can explain without notes, because even if he has notes, he cannot give the correct info…
4	3	3	4	2	4	4	4	4	4	4	4	4	4	4	4	Hocamiz keşke dersi ingilizce işlemeseydi önümüzdeki kpss için daha iyi olabilirdi.	If only our teacher had not taught the course in English, it would have been better for the upcoming KPSS.
4	4	4	4	4	4	4	4	4	4	4	4	4	4	4	4	İyi kalpli bi hocamız. Öğrencinin yanında ve bilgisi yüksek. Aktarımı iyi. Teşekkür ediyorum kendisine bu dönem için	He is a good-hearted teacher. He is with the student and has high knowledge. Transfer is good. I thank him for this period.
1	1	1	1	1	1	1	1	1	1	1	1	1	1	1	1	Hocamız tüm dönem boyunca kendi yazdığı kitabı derste okuyarak ders işledi. Kitap okunacaksa derse devam zorunluluğu konulmamalı. Ki ayrıca benim de okuma yazmam var, materyal sadece okuma üzerineyse dersin amacı ne oluyor tam olarak anlamış değilim	Our teacher taught by reading the book he wrote during the entire semester. If the book is to be read, class attendance should not be compulsory. Also, I can read and write, but I don't fully understand what the purpose of the course is if the material is only about reading.
4	4	4	4	4	4	4	4	4	4	4	4	4	4	4	4	1001110001101011100011010	1.00111e+24
4	4	4	4	4	4	4	4	4	4	4	4	4	4	4	4	Konsept olarak en faydalı İngilizce dersiydi asli hocamızdan cok tatli bir hoca	In terms of concept, it was the most useful English lesson. Our actual teacher is a very sweet teacher.
4	4	4	4	3	3	3	3	3	4	4	4	4	4	4	4	İçerik açısında güzel ve öğretici bir ders	A nice and instructive course in terms of content
4	4	4	4	4	4	4	4	4	4	4	4	4	4	4	4	Harika bir öğretmendi,	He was a great teacher,
4	4	4	4	4	4	4	4	4	4	4	4	4	4	4	4	Emekleriniz için teşekkür ederiz hocam	Thank you for your efforts, sir.
4	3	4	3	4	3	4	2	4	3	3	3	3	3	3	3	uzaktan eğitimdeki aksaklıkların giderilmesi	Eliminating problems in distance education
4	4	4	4	4	4	4	4	4	4	4	4	4	4	4	4	Kullanılan materyaller ders içeriği ile uyumluydu. Uzaktan eğitim olması beni etkilemedi.	The materials used were compatible with the course content. The fact that it was distance education did not affect me.
4	4	4	4	4	4	4	4	4	4	4	4	4	4	4	4	Dersten memnunum	I am satisfied with the course
4	4	4	4	4	4	4	4	4	4	4	4	4	4	4	4	Hocamıza bu dönem için teşekkür ederiz, derslere katılım çok çok az olmasına rağmen şevkle dersi anlattı bizlere. Hiçbir eleştirim yoktur	We would like to thank our teacher for this semester, he explained the lesson to us with enthusiasm even though the attendance was very low. I have no criticism
2	2	2	2	2	2	2	2	2	2	2	2	2	2	2	2	Çok zor asla geçirmiyor	It's so hard, it never goes away
4	4	4	4	4	4	4	3	4	4	4	4	4	4	4	4	Kolay bir dersti. Hocamızın bizlerle paylaştığı sunumlar çok detaylı ve açıklayıcı idi. Kendisinin hitabeti, ses tonu dersi dinlemeye teşvik etti. Emekleri için teşekkürlerimi sunuyorum	It was an easy lesson. The presentations our teacher shared with us were very detailed and descriptive. His oratory and tone of voice encouraged him to listen to the lecture. I thank you for your efforts
4	4	4	4	4	4	4	4	4	4	4	4	4	4	4	4	YOK	NO
3	3	3	3	3	3	3	4	4	4	4	4	4	4	4	4	Derslerin daha eğlenceli geçmesini sağlanmalı.	Lessons should be made more fun.
2	2	1	2	2	2	2	1	2	1	1	1	1	1	1	1	Tüm dönem boyunca 1 ders bile yapılmadı buna rağmen vize ve final ödevleri verildi.	Not even one lesson was taught throughout the semester, yet midterm and final assignments were given.
4	4	4	4	4	4	4	4	4	4	4	4	4	4	4	4	Yukarıda doldurduğum hoca ile ilgili bilgilerin hepsi doğru rastgele doldurmadım hepsi çok iyiydi. Teşekkür ederiz hocam	All of the information about the teacher I filled out above is correct, I did not fill it in randomly, it was all very good. Thank you sir
4	4	4	4	4	4	4	4	4	4	4	4	4	4	4	4	İyi	Good
4	4	4	4	4	4	3	3	3	3	3	3	3	3	3	3	Değerli Öğretim Görevlimize özverili yaklaşımı ve bize kattığı bilgiler için teşekkür ederim.	I would like to thank our esteemed lecturer for his devoted approach and the information he provided us.
3	3	3	3	3	3	3	3	3	3	3	3	3	3	3	3	güzel bir dönemdi	it was a good time
4	4	4	4	4	4	4	4	4	4	4	4	4	4	4	4	KESİNLİKLE ÖĞRETİM ELEMANI DERS ÖĞRENİMİNİ AÇISINDAN AŞIRI TEŞVİK EDİCİYDİ VE ULAŞILABİLİRLİK AÇISINDAN ASLA BİR SIKINTI ÇIKMIYORDU.	DEFINITELY THE LECTURER WAS EXTREMELY ENCOURAGING IN TERMS OF COURSE LEARNING AND THERE WAS NEVER A PROBLEM IN TERMS OF ACCESSIBILITY.
4	4	4	4	4	4	4	4	4	4	4	4	4	4	4	4	Ders işleyişi gayet güzeldi.	The course process was very good.
3	3	3	3	2	3	3	3	3	3	3	3	3	3	3	3	Sınavların ingilizcesinin çok daha kolay olmasını beklerdim. Bildiğim şeyleri de yanlış anladığım için ortalamamı düşürdü.	I expected the English exams to be much easier. It lowered my GPA because I misunderstood the things I knew.
3	3	3	4	2	2	1	3	3	1	1	1	1	1	1	1	Online yürütülen derslere katılım zorunlu olmamasına rağmen ders sorumlusu hocamızın derse katılmayan öğrenciler hakkındaki uyarısı çok sık tekrarlandı ve bu da motivasyonu bozup zaman kaybına neden oldu. Katılım sağlayan öğrencilere en yüksek verimle ders devam etmeliydi. Hocalarımın bilgi birikimi yüksek olsa da bunu aktarabilme şekli önemlidir bu yüzden açıkçası biraz daha dinamik ve genç hoca…	Although attendance at online classes was not compulsory, our lecturer's warning about students not attending the class was repeated very frequently, which disrupted motivation and caused loss of time. The lesson should have continued with the highest efficiency for the students who participated. Even though my professors have a high level of knowledge, the way they convey this knowledge is impor…
4	4	4	4	4	4	4	4	4	4	4	4	4	4	4	4	Hem online, hem yüzyüze en iyi ve akıcı yürütülen iki dersimizden birisiydi. Hocamız tabiki çok anlayışlı ve alanında çok bilgili. Derste verilen ödevlerimiz ders ile gayet uyumluydu. Derslerde kullanılan materyaller gayet anlaşılır bir dildeydi. Hiçbir sorun yaşamadık. Teşekkür ederizz :)	It was one of our two best and most fluid courses, both online and face-to-face. Our teacher is of course very understanding and very knowledgeable in his field. Our homework given in class was very compatible with the course. The materials used in the lessons were in a very understandable language. We had no problems. Thank you :)
4	4	4	4	4	4	4	4	4	4	4	4	4	4	4	4	her şey olması gerektiği gibiydi :)	Everything was as it should be :)
4	4	4	4	4	4	4	4	4	4	4	4	4	4	4	4	Teşekkürler	Thanks
4	4	4	4	4	4	4	4	4	4	4	4	4	4	4	4	gerçekten ne anlatırsa anlatsın teoriye bağlı kalmadan gerçek hayatta ne işimize yarayacaksa onun üzerinden anlatıyor böyle hocaların artması lazım.	There should be more teachers like this, no matter what they say, they explain it based on what will be useful to us in real life, without relying on theory.
4	4	4	4	4	4	4	4	4	4	4	4	4	4	4	4	final için verilen sınav süresi yetersizdi ve hocamız keşke sınıfta sorduğu soruları yanıtlasaydı çünkü cevaplarına ulaşamıyorduk.	The exam time given for the final was insufficient and we wish our teacher had answered the questions he asked in class because we could not access the answers.
2	2	3	3	3	3	1	1	1	1	1	1	1	1	1	1	Hocanın öğrencilerle iletişimi konuşma üslubu hiç iyi değil. Bir eğitimciye yakışır üslupta konuşmadı benle.	The teacher's communication style with the students is not good at all. He did not speak to me in a manner befitting an educator.
4	4	4	4	4	4	4	4	4	4	4	4	4	4	4	4	Vizeden sonraki konuları da dersin sorumlu hocasından dinlemek ve bilgilerinden faydalanmak isterdim.	I would like to hear from the instructor in charge of the course and benefit from his knowledge about the issues after midterm.
3	3	3	3	3	3	3	3	3	3	3	3	3	3	3	3	güzel bir dönemdi	it was a good time
4	4	4	4	4	4	4	4	4	4	4	4	4	4	4	4	Güzel ders	nice lesson
4	4	4	4	4	4	4	4	4	4	4	4	4	4	4	4	Ders dönem başından itibaren hep yüzyüze, üniversite ortamında yapılsaydı daha çok verim alacağımı düşünüyorum.	I think I would be more productive if the course was always held face to face, in a university environment, from the beginning of the semester.
4	4	4	4	4	4	4	4	4	4	4	4	4	4	4	4	Hocamıza katkılarından dolayı çok teşekkür ederim.	I would like to thank our teacher very much for his contributions.
4	4	4	4	4	4	4	4	4	4	4	4	4	4	4	4	Çok güzel bir ders	A very nice lesson.
4	4	4	4	4	4	4	4	4	4	4	4	4	4	4	4	Hocamıza teşekkür ederim. Benim için online süreçte matematiği anlamak çok zor oldu. Yeterince verim alamadım.	Thank you to our teacher. It was very difficult for me to understand mathematics in the online process. I couldn't get enough efficiency.
4	4	4	4	4	4	4	4	4	4	4	4	4	4	4	4	öğretmenin dersi işleyişi iyidi	The teacher taught the lesson well
4	4	4	4	4	4	4	4	4	4	4	4	4	4	4	4	Eğlenceliydi	it was fun
2	2	2	2	2	2	2	2	2	2	2	2	2	2	2	2	Ders online şeklide çok daha verimli gerçekleştirildi.	The course was conducted much more efficiently online.
4	1	4	4	4	4	4	4	4	1	1	1	1	1	1	1	belirli bir tarihten sonra bu ders işlenmedi...	This course was not taught after a certain date...
4	4	4	4	4	4	4	4	4	4	4	4	4	4	4	4	Çok keyifli ve verimliydi.	It was very enjoyable and productive.
4	4	4	4	4	4	4	4	4	4	4	4	4	4	4	4	Her şey çok güzeldi.	Everything was beautiful.
4	4	4	4	4	4	4	4	4	4	4	4	4	4	4	4	Teşekkür ederim.	Thank you.
4	4	4	4	4	4	4	4	4	4	4	4	4	4	4	4	Dersin niteliği çok yüksek kalitedeydi. Ders kapsamında tartıştığımız düşünürlerin kuramlarını araştırıp, tartışmak ve çeşitli kitapları okumak mesleki gelişimime oldukça katkı sağladı.	The quality of the course was of very high quality. Researching and discussing the theories of the thinkers we discussed in the course and reading various books contributed greatly to my professional development.
4	4	4	4	4	4	4	4	4	4	4	4	4	4	4	4	Bu dersin türkçe yapılması gerektiğini düşünüyorum	I think this course should be taught in Turkish.
3	3	3	3	3	3	2	2	2	2	2	2	2	2	2	2	Bence bu ders yüzyüze olmalı ve daha interaktif olmalı.	I think this course should be face to face and more interactive.
4	4	4	4	4	4	4	4	4	4	4	4	4	4	4	4	Bence hocamız gayet iyi anlatıyor sohbet havasında anlatması dersi sıkıcı yapmıyor.	I think our teacher explains very well and does not make the lesson boring because he explains it in a conversational manner.
3	3	3	3	3	3	3	3	3	3	3	3	3	3	3	3	kullanılan kitabın paralı olması ve kitabı almadığımız zamanda 10 puanımızın eksilmesi hoş bir şey değil herkesin kitabı alabilecek bir miktarı yok ve kitap çok pahalı bize zorla aldırılmamalı. online olmasına rağmen finalin yüz yüze olması çok saçmaydı online dersten verim nasıl almamız bekleniyor	It is not a good thing that the book we use is expensive and we lose 10 points when we do not buy the book. Not everyone has enough money to buy the book and the book is very expensive and we should not be forced to buy it. It was ridiculous that the final was face to face even though it was online. How are we expected to get results from the online course?
4	4	4	4	3	3	3	4	4	4	4	4	4	4	4	4	Uygulama malum şartlar nedeniyle gerçekleştirilemedi. Yine de genele matuf bilgiler edindik.	The application could not be carried out due to certain conditions. However, we obtained general information.
4	4	2	3	3	3	1	3	2	1	1	1	1	1	1	1	Dersin adı akademik ingilizce olmasına rağmen akademik olarak beni hiç geliştirmedi. Ben daha çok mesleki ingilizce beklerdim. O da olmasa bile işlediğimiz kitap gerçek anlamda ne öğrenmeye teşvik edici ne de yararlı ve geliştirici bir kitaptı. Hazırlık okumuş olmamdan biliyorum oradaki kitaplardan farksızdı ve bölümümle hiçbir alakası yoktu. Aynı zamanda notum muafiyete yeterli olsa dahi muaf ol…	Even though the course was called Academic English, it did not improve me academically at all. I expected more professional English. Even without that, the book we studied was neither truly encouraging nor helpful and developmental. I know from my preparatory education that it was no different from the books there and had nothing to do with my department. At the same time, even if my grade was su…
2	4	4	4	3	3	2	2	3	3	3	3	3	3	3	3	Hocayı anlatmakta zorlandığım anlar oldu ama öğrenmeye katkı olan bir dersti	There were moments when I had difficulty explaining the teacher, but it was a lesson that contributed to learning.
4	4	4	4	4	4	4	4	4	4	4	4	4	4	4	4	Dersin içeriği ve eğitimi iyi geçti.	The content and training of the course went well.
4	4	3	4	4	4	4	4	4	4	4	4	4	4	4	4	Öğretmenimiz konu hakimiyeti iyiydi bizim anlayacağımız şekilde konuyu anlatıyordu ve konuşuyordu	Our teacher had good command of the subject and was explaining and speaking the subject in a way we could understand.
3	3	3	3	3	3	3	3	3	3	3	3	3	3	3	3	güzel	Beautiful
3	2	3	3	3	4	4	4	4	4	4	4	4	4	4	4	Oldukça zor, çalışılmadığı vakit iyi bir not almanın imkansız olduğu bir ders olduğunu düşünüyorum.	I think it is a very difficult course and it is impossible to get a good grade if you do not study.
4	4	4	4	4	4	4	4	4	4	4	4	4	4	4	4	Dersin öğretim amacı yerindeydi ve bilgisayara yönelik bilgilerimi pekiştirdi	The teaching purpose of the course was appropriate and it reinforced my computer knowledge.
3	2	3	3	3	2	2	3	3	2	2	2	2	2	2	2	işleniş olarak çok sadeydi	It was very simple in operation.
4	4	4	4	4	4	4	4	4	4	4	4	4	4	4	4	Guzel bir derstti	It was a good lesson
4	4	4	4	4	4	4	4	4	4	4	4	4	4	4	4	Değerlendirecek kişi ben değilim	I'm not the one to judge
4	4	4	4	4	4	4	4	4	4	4	4	4	4	4	4	öğretim elemanından çok memnunduk ders ile ilgili tüm materyalleri kullandı öğrenmemiz için elinden geleni yaptı	We were very pleased with the instructor. He used all the materials related to the course and did his best to help us learn.
4	4	4	4	4	4	4	4	4	4	4	4	4	4	4	4	Üniversitemiz gayet iyi tanıtıldı. Birinci sınıf öğrencisi olarak bu ders sayesinde soru işaretlerim giderildi.	Our university was promoted very well. As a first-year student, my question marks were resolved thanks to this course.
4	4	4	4	4	4	4	4	4	4	4	4	4	4	4	4	Ders işleyişi ve hocamınız iletişimi gayet yeterli ve kaliteydi, her şey için teşekkürler	The course process and your teacher's communication were very sufficient and of high quality, thank you for everything.
3	3	3	3	3	3	3	3	3	3	3	3	3	3	3	3	hocama emeklerinden dolayı çok teşekkür ederim	I thank my teacher very much for his efforts.
4	4	4	4	4	4	4	4	4	4	4	4	4	4	4	4	Dersler güzeldi. Her şey olumluydu	The lessons were nice. Everything was positive
4	4	4	4	4	4	4	4	4	4	4	4	4	4	4	4	Anlatım güzeldi.	The explanation was nice.
3	3	3	3	3	3	3	3	3	3	3	3	3	3	3	3	Çok zor	Very difficult
3	3	3	3	3	2	2	3	3	3	3	3	3	3	3	3	Hoca bazen anlaşılmıyor olsa da ders de baya zordu zorlandığım bir ders oldu	Even though the teacher was sometimes incomprehensible, the course was also very difficult and it was a course that I had a hard time with.
4	4	4	4	4	4	4	4	4	4	4	4	4	4	4	4	Çok güzel bir dersti. Yeni bilgiler öğrendim. Hocamıza teşekkür ederim.	It was a very good lesson. I learned new information. Thank you to our teacher.
4	4	4	4	4	4	4	4	4	4	4	4	4	4	4	4	Hocamızın ders kaynak kitabını vererek öğrenmem hususunda desteği için teşekkür ediyorum	I would like to thank our teacher for his support in learning by giving me the course reference book.
4	4	4	4	4	4	4	4	4	4	4	4	4	4	4	4	Güzel ve bilgilendirici bir dersti.	It was a nice and informative lesson.
1	1	1	1	1	1	1	1	1	1	1	1	1	1	1	1	Sürekli hocanın slayt üzerinden okuyup hiçbir şey anlamadan bitirdiğim bir dersti büyük bir ihtimalle çok düşük bir ortalamayla vermiş olacağım. Üniversitemizin sosyoloji bölümü olmasına rağmen neden dışarıdan gelen hocalar. Dilerdim ki hocamız daha aktif bulunsun derste ve monoton bir ders olmamasıydı	It was a course that I finished by constantly reading the instructor's slides and not understanding anything, and I would most likely have given it with a very low GPA. Even though our university has a sociology department, why are there professors coming from outside? I wish our teacher would be more active in the lesson and that it would not be a monotonous lesson.
3	3	3	3	3	3	3	3	4	4	4	4	4	4	4	4	Dersler genellikle anlaşılır bir dil kullanılarak, sık tekrarlar ile anlatıldı. Slaytlar kolay anlaşılır, uzun ve ayrıntılıydı. Son haftaya kalan konunun diğer konulara ve derslere göre hızlı geçilmiş olması ve final sınavında yüksek oranla sorulması dersin de zor olması itibarıyla final sınavını zorlaştırmıştı. Final sınavının 60 soru/60 dk olması hakkında; soru sayısının fazlalığından ve zorlay…	Lessons were generally explained using understandable language and with frequent repetitions. The slides were easy to understand, long and detailed. The fact that the subject left to the last week was passed faster than other subjects and courses and the high rate of questions in the final exam made the final exam difficult, as the course was also difficult. About the final exam being 60 question…
4	4	4	4	4	4	4	4	4	4	4	4	4	4	4	4	ilave bir görüşüm bulunmamaktadır. derslerimiz bol örnekli geçmektedir, teşekkür ederim.	I have no additional opinion. Our lessons are full of examples, thank you.
3	3	3	3	3	3	3	3	3	3	3	3	3	3	3	3	İyi	Good
4	4	4	4	4	4	4	4	4	4	4	4	4	4	4	4	Bu dersi alırken biraz tekrar ders diye düşünmüştüm fakat dönem sonundaki bilgilerime baktığımda tüm seneleri özetlemiş ve güzel bir tekrar yapmış gibi hissettim. Derslerde kaçırdığımız noktaları bu derste güzel ele aldığımızı düşünüyorum.	While taking this course, I thought it would be a bit of a review, but when I looked at my information at the end of the semester, I felt like I had summarized all the years and had a good review. I think we covered the points we missed in the lessons well in this lesson.
2	2	2	2	2	2	2	2	2	2	2	2	2	2	2	2	Dönem boyu aşağılama ve çok alaycı bir tavırlar ders işlendi. soru sormayaçekinerek derse geldim. öğrenme amaçlı değiliğneleme ile geçti derslerimiz.asla verimli olduğunu düşünmüyorum . Derse gelirken ayağım geri geri gitti Dönem boyunca .	Throughout the semester, humiliation and a very sarcastic attitude were taught. I came to class hesitant to ask questions. Our lessons were spent with sarcasm, not for learning purposes. I don't think it was ever productive. My foot went backwards while coming to class. Throughout the semester.
4	4	4	4	4	4	4	4	4	4	4	4	4	4	4	4	Hocamıza çok teşekkür ederim.	Thank you very much to our teacher.
4	4	4	4	4	4	4	4	4	4	4	4	4	4	4	4	Hocamıza çok teşekkür ederim. Konusuna hakim ve soru sorulduğunda püf noktalarıyla birlikte yanıt alabiliyorsunuz. Bir kez daha karşılaşmak dileğiyle..	Thank you very much to our teacher. He is knowledgeable about his subject and when asked a question, you can get answers with tips. Hope to meet you once again..
4	4	4	4	4	4	4	4	4	4	4	4	4	4	4	4	Hocamızın dersinden ders anlatımından memnunum	I am satisfied with our teacher's lesson and his teaching.
4	4	4	4	4	4	4	4	4	4	4	4	4	4	4	4	Hocamız çok iyiydi çok güzel ders anlatıyordu sınavlar konusunda gerçekten yardımcı oldu. Sadece ders cuma günü ve 5 de idi. bu yüzden çok verimli olmadı keşke daha önceki saatlerde olabilseydi.	Our teacher was very good, he taught very well and he really helped me with the exams. Only class was on Friday and at 5pm. That's why it wasn't very productive, I wish it could have happened earlier.
4	4	4	4	4	4	4	4	4	4	4	4	4	4	4	4	Değerli katkılarından ve vermiş olduğu emekten dolayı hocamıza teşekkürederim.Saygılar	I would like to thank our teacher for his valuable contributions and efforts. Best regards.
4	4	4	4	4	4	4	4	4	4	4	4	4	4	4	4	Hocamdan çok memnunum.	I am very pleased with my teacher.
3	2	2	3	3	2	3	2	3	2	2	2	2	2	2	2	Dersin verilen QuickDraw ve ödevlerin yorucuydu	The QuickDraw and homework assignments were tiring.
3	3	3	3	3	3	3	4	4	3	3	3	3	3	3	3	Öğretim elemanı ile ilgili bir sorun yok ancak ders çok zor ve basitleştirilmesi gerekiyor.	There is no problem with the instructor, but the course is very difficult and needs to be simplified.
4	4	4	4	4	4	4	4	4	4	4	4	4	4	4	4	Her şey çok açık ve net bir sekilde anlattı gayet güzel ders işlenişi oldu	He explained everything very clearly and clearly, the course was taught very well.
2	2	1	1	2	1	2	2	1	1	1	1	1	1	1	1	Öğretim elemanı ders süresi hakkında çok katı. Derse geç kalan öğrenciye yönelik hiçbir şekilde anlayış göstermemektedir. Bu durum derse olan ilgimi ve isteğimi büyük oranda azalttı. Bu öğretim üyesinin hiçbir dersine öğrenmek amacıyla girmediğimi, öğrenmek istesem bile derslerinde hiçbir şey kazanım elde edemediğimi belirtmek isterim.	The lecturer is very strict about class time. He shows no understanding towards the student who is late for class. This situation greatly reduced my interest and desire for the course. I would like to state that I did not attend any of this faculty member's classes to learn, and even if I wanted to learn, I could not gain anything from his classes.
4	4	4	4	4	4	4	4	4	4	4	4	4	4	4	4	Ders verimli ve anlaşılırdı.	The lesson was efficient and understandable.
3	3	3	3	3	3	3	3	3	3	3	3	3	3	3	3	Dersin verimli geçtiğini düşünüyorum	I think the lesson was productive
4	4	4	4	4	4	4	4	4	4	4	4	4	4	4	4	Der çok iyi anlatıldı	The lesson was explained very well.
3	3	3	3	3	3	3	3	3	3	3	3	3	3	3	3	Verimliydi	It was productive
4	4	4	4	4	4	4	4	4	4	4	4	4	4	4	4	İyi	Good
1	1	1	2	1	1	1	1	1	1	1	1	1	1	1	1	dersin öğretmeni derse sadece 2 kere katıldı, gönderdiği slaytlar hiç anlaşılır değildi, sınavlarda derste işlemediği konulardan sorular sordu	The teacher of the course only attended the lecture twice, the slides he sent were not understandable at all, and during the exams he asked questions from subjects he had not covered in the lecture.
2	3	3	3	3	3	2	2	2	2	2	2	2	2	2	2	Slaytlarda yüklem bulunmaması geri dönüp slaytları çalıştığımızda bizi çok zorluyor. Ayrıca vizenin slaytlar harıcinde soru sormayacağım denilmesime rağmen slyatta olmayan sorular içermesi, hocamızın derste anlatırken `anatomiden biliyor olmanız lazım? `fizyolojiden biliyo olmanız lazım? gibi cümleler kullanmasına dayanarak yetersiz temelimizin oluşu anatomiyi online alıp, fizyoloji dersini yarım…	The absence of predicates in the slides makes it very difficult for us when we go back and study the slides. In addition, although I was told that I would not ask questions other than the slides, the visa included questions that were not in the slides, and our teacher said, 'You must know about anatomy?' `You must know about physiology? Based on the use of sentences such as these, we experience t…
4	4	4	4	4	4	4	4	4	4	4	4	4	4	4	4	Harika	Great
2	2	2	2	2	2	2	2	2	2	2	2	2	2	2	2	çok iyi	Very good
4	4	4	4	4	4	4	4	4	4	4	4	4	4	4	4	Çookks. İyiyiçok iyi bir hoca	Soooooks. Good, very good teacher
4	4	4	4	4	4	4	4	4	4	4	4	4	4	4	4	Emekleriniz için teşekkür ederim hocam. Her şey yeterli ve anlaşılabilir düzeydeydi.	Thank you for your efforts, sir. Everything was adequate and understandable.
4	4	4	3	3	3	2	3	3	3	3	3	3	3	3	3	iyi bir hoca sınav çok zordu	Good teacher, the exam was very difficult
4	4	4	4	4	4	4	4	4	4	4	4	4	4	4	4	Hoca konuyu güzel ve açıklayıcı olarak ankattı	The teacher explained the subject beautifully and clearly.
4	4	4	4	4	4	4	4	4	4	4	4	4	4	4	4	Ders çok iyi anlatıldı	The lesson was explained very well
3	3	3	3	3	4	3	3	3	4	4	4	4	4	4	4	Yeterli	Sufficient
4	4	4	4	4	4	4	4	4	4	4	4	4	4	4	4	İyiydi	it was good
4	4	4	4	4	4	4	4	4	4	4	4	4	4	4	4	Ders içeriği ve sınav çok zor. Çok çok çok çok çok zor.	The course content and exam are very difficult. It is very very very very difficult.
4	4	4	4	4	4	4	4	4	4	4	4	4	4	4	4	Hocamıza katkılarından ve öğrencileriyle olan güzel iletişiminden dolayı teşekkür ederim.	I would like to thank our teacher for his contributions and his good communication with his students.
2	2	2	2	2	2	2	2	2	2	2	2	2	2	2	2	sınav çok zordu	the exam was very difficult
4	4	4	4	4	4	4	4	4	4	4	4	4	4	4	4	çok iyiydi	it was very good
3	3	3	3	3	3	3	3	3	3	3	3	3	3	3	3	Verimliydi	It was productive
4	4	4	4	4	4	4	4	4	4	4	4	4	4	4	4	Süreci çok rahat yürüttüğümden ilave bir önerim bulunmamaktadır. Teşekkür ederim.	Since I carried out the process very easily, I do not have any additional suggestions. Thank you.
3	2	2	1	1	1	2	2	2	1	1	1	1	1	1	1	dönem içerisinde hocamızın bizden istediği görevleri, dersin kapsamıyla bağdaştırmakta hep zorlandık. Yapacağımız ödevlerde hep birden fazla, karışık bir dille verilen yönergeler olması işimizi epey zorlaştırdı ve bizi yordu. istediğim kazanımları elde edemedim	During the semester, we always had difficulty in reconciling the tasks our teacher asked of us with the scope of the course. The fact that we were given multiple instructions in complicated language for our assignments made our work very difficult and tired us. I couldn't get the results I wanted
4	4	4	4	4	4	4	4	4	4	4	4	4	4	4	4	Her şey için teşekkürler :)	Thanks for everything :)
4	4	4	4	4	4	4	3	3	3	3	3	3	3	3	3	İyiydi genel olarak	It was good overall
4	4	4	4	4	4	4	4	4	4	4	4	4	4	4	4	Teşekkür ederim	Thank you
4	4	4	4	4	4	4	4	4	4	4	4	4	4	4	4	Dersin içeriğinin yoğun olduğunu düşünüyorum. İleriki dönemlerde ayrıntılı öğreneceğimiz kavramların bir tanıtımı niteliğinde olduğunun farkındayım fakat yine de daha önce duymadım birçok kavramı tam olarak ne işe yaradıklarını anlamadan ezberlemem gerekti. Bu sorunun çözümüyle ilgili herhangi bir önerim yok.	I think the content of the course is intense. I am aware that it is an introduction to the concepts that we will learn in detail in the future, but I still had to memorize many concepts that I had never heard before, without fully understanding what they were used for. I don't have any suggestions for solving this problem.
4	4	4	4	4	4	4	4	4	4	4	4	4	4	4	4	Dersimiz çok verimli geçti bütün materyalleri derse uygun bir şekilde kullandık	Our lesson was very productive and we used all the materials appropriately for the lesson.
4	4	4	4	4	4	4	4	4	4	4	4	4	4	4	4	Fazlasıyla verimli ve güzel bir dersti. Diğer hocalarımız gibi sadece slaytlardan okuyarak ders anlatmadığı için ve açık ve anlaşılır bir biçimde ders anlatan hocamıza da teşekkür ederim. İstekle gittiğim ve bittiğine üzüldüğüm ikinci dersimdi.	It was a very productive and beautiful lesson. I would also like to thank our teacher for not just reading from the slides and teaching in a clear and understandable way like our other teachers. It was my second lesson that I went to willingly and was sad to see it end.
4	4	4	4	4	4	4	4	4	4	4	4	4	4	4	4	Dersin öğretim elemanı çok tatlı ve çok ilgili bir insandı. Tüm ders içeriklerine erişimimizi kolaylaştırdı.	The instructor of the course was a very sweet and caring person. It made it easier for us to access all course content.
3	3	3	3	3	3	3	3	3	3	3	3	3	3	3	3	Zordu	it was hard
3	3	3	3	3	3	3	3	3	3	3	3	3	3	3	3	Detayli bir sekilde işlendi	Processed in detail
3	3	3	3	3	3	3	3	3	3	3	3	3	3	3	3	İyi	Good
3	3	3	3	3	3	3	3	3	3	3	3	3	3	3	3	iyi	Good
4	4	4	4	4	4	4	4	4	4	4	4	4	4	4	4	K	K
4	4	4	4	4	4	4	4	4	4	4	4	4	4	4	4	güzeldi	it was nice
4	4	4	4	4	4	4	4	4	4	4	4	4	4	4	4	Sayın Hocam; katkılarınız için teşekkür ederim.	Dear Sir; Thank you for your contributions.
4	4	4	4	4	4	4	4	4	3	3	3	3	3	3	3	Öğretim elemanımı seviyorum kariyer bilglendirici bir ders	I love my lecturer, career informative course
4	4	4	3	4	4	4	4	4	3	3	3	3	3	3	3	Dersin işleyişinde ve aktarımında bir sıkıntı olduğunu düşünmüyorum	I don't think there is any problem in the operation and delivery of the course.
4	4	4	4	4	4	4	4	4	4	4	4	4	4	4	4	Yok	None
4	4	4	4	4	4	4	4	4	4	4	4	4	4	4	4	Her şey olması gerektiği gibiydi	Everything was as it should be
4	4	4	4	4	4	4	4	4	4	4	4	4	4	4	4	Dersin katkısı çok oldu hocama ilgi ve alakası için çok teşekkür ediyorum	The lesson contributed a lot, I thank my teacher very much for his interest and interest.
4	4	4	4	4	4	4	4	4	4	4	4	4	4	4	4	Bu dersin bana çok şey kattığını düşünüyorum.	I think this course added a lot to me.
4	4	4	4	4	4	4	4	4	4	4	4	4	4	4	4	Bazen ÖYS sitesine giriş yapmakta zorluk yaşadım.	Sometimes I had difficulty logging in to the LMS site.
4	4	4	4	4	4	4	4	4	4	4	4	4	4	4	4	İyi	Good
2	2	2	2	2	2	2	2	2	2	2	2	2	2	2	2	Ke	ke
4	4	4	4	3	4	4	4	4	2	2	2	2	2	2	2	İşini hakkıyla yapan bir hoca.Ama öğrencileri sevmediğini belli ediyor.Sevmesini isterdim gerçekten.	He is a teacher who does his job properly. But he shows that he does not like his students. I really wish he did.
4	4	4	3	3	3	4	4	3	3	3	3	3	3	3	3	Keşke yüz yüze olsa	I wish it was face to face
4	4	4	4	4	2	2	2	2	2	2	2	2	2	2	2	Sınavda kopya çekmeye yönelik girişimde bulunan çokça arkadaş duydum bu kişi hem anayasa hem de medeni dersi sınavının testlerini ön sıradaki arkadaşının optiğinden geçirmiş biraz daha sıkı bir gözetim yapılmasını gerekirse sınav başlamadan öğrenci yerlerinin değiştirilmesini talep ediyorum	I have heard of many friends who attempted to cheat in the exam. This person passed the tests of both the constitution and the civil course exam through the optics of his friend in the front row. If necessary, I request that the student places be changed before the exam starts.
4	4	4	4	4	4	4	3	4	3	3	3	3	3	3	3	ders içinde konuşma pratiği ve videolu dinleme yapılması öğrenmeyi daha da kolaylaştırabilir.	Speaking practice and video listening during the lesson can make learning easier.
4	4	4	4	4	4	4	4	4	4	4	4	4	4	4	4	Hocamıza tüm dönem boyunca verdiği dersler ve öğrettiği bilgiler için teşekkür ederim.	I would like to thank our teacher for the lessons and information he gave throughout the semester.
4	4	4	4	4	4	4	4	4	4	4	4	4	4	4	4	Dersimiz çok güzeldi.Hocama teşekkür ederim.	Our lesson was very nice. Thank you teacher.
4	4	4	4	4	4	4	4	4	4	4	4	4	4	4	4	Dersimiz çok verimli ve güzel geçiyor o yüzden ekliycek bir görüşüm yok	Our lesson is very productive and good, so I don't have anything to add.
3	3	3	3	3	3	3	3	3	3	3	3	3	3	3	3	Eski bir ders materyali kullanılıyor.	An old course material is used.
4	4	4	4	4	4	4	4	4	4	4	4	4	4	4	4	Süper hoca	super coach
4	4	4	4	4	4	4	4	4	4	4	4	4	4	4	4	Çok iyi	Very good
4	4	4	4	4	4	4	4	4	4	4	4	4	4	4	4	Çok iyi	Very good
3	3	3	3	3	3	3	3	3	3	3	3	3	3	3	3	kaba birisi ulaşmak çokı zor	rude person very hard to reach
4	4	4	4	4	4	4	4	4	4	4	4	4	4	4	4	Sunumlar yerine, haftalık sorduğunuz soruları sınıfta tartışmak daha verimli olabilirdi. Çok güzel ve öğretici bir dersti teşekkür ederim..	Instead of presentations, it would be more productive to discuss the questions you ask weekly in class. It was a very nice and instructive lesson, thank you.
2	2	3	3	3	2	1	2	1	2	2	2	2	2	2	2	Hayvan doku kısmının laboratuvar uygulamalarının yetersiz ve verimsiz olduğunu düşünüyorum. Labda yapılan yanlış hareketler ve uygulamalar sonucunda öğrenimin zorlaştığını ve dersin sorumlusunun efektif bir biçimde lab seanslarını yürütemediğini düşünüyorum. Protokoldeki uyuşmazlıklar ve cihazların kötü kullanımı sonucu laboratuvarın yetersiz ve eksik olduğunu düşünüyorum.	I think laboratory applications of animal tissue are inadequate and inefficient. I think that learning has become difficult as a result of wrong movements and applications made in the lab and the course instructor cannot conduct the lab sessions effectively. I think the laboratory is inadequate and incomplete as a result of inconsistencies in the protocol and misuse of devices.
4	4	4	4	4	4	3	4	4	4	4	4	4	4	4	4	Emeğiniz için teşekür ederim ?	Thank you for your effort.
4	4	4	4	4	4	4	4	4	4	4	4	4	4	4	4	Hiçbir eleştirim yok, çok seviyoruz <3	I have no criticism, we love it very much <3
3	3	3	3	3	3	3	3	3	3	3	3	3	3	3	3	Süper	Super
3	3	3	3	3	3	3	3	3	3	3	3	3	3	3	3	Finalin 60 puan olması , zor olması ve çok az soru olması haksızlıktı .	It was unfair that the final had 60 points, was difficult and had very few questions.
1	1	1	1	1	1	1	1	1	1	1	1	1	1	1	1	Orta	Middle
4	4	4	4	4	4	4	4	4	4	4	4	4	4	4	4	Her şey harikaydı	Everything was great
1	1	1	1	1	1	1	1	1	1	1	1	1	1	1	1	Hiç bir niteliği olmayan ve 4. sınıf öğrencisi için uğraştırıcı ve gereksiz bir dersti.	It was a challenging and unnecessary course for a 4th grade student with no qualifications.
3	2	4	4	4	3	2	4	4	4	4	4	4	4	4	4	Bana hiçbir katkısı olmayan bir dersti. Yalnızca haftada 2 saatimi boşa geçirmiş oldum. Bölümde böyle bir dersin varlığının gereksiz olduğunu düşünüyorum. Gerekliyse de öğretimde yöntemler değişmeli. Öğretim elemanı öğrencilere karşı ilgisiz. Son hafta yaptığımız articulate dönem ödevi videosunda her şeyi anlayarak yaptım video içindeki anlatımı çok yeterliydi ancak ders içinde bu söz konusu deği…	It was a lesson that did nothing for me. I only wasted 2 hours a week. I think the existence of such a course in the department is unnecessary. Even if necessary, teaching methods should change. The instructor is indifferent towards the students. In the articulate term paper video we did last week, I understood everything and the explanation in the video was very sufficient, but this is not the c…
4	4	4	4	4	4	4	4	4	4	4	4	4	4	4	4	Dersin içeriği öğretici ve faydalıydı	The content of the course was instructive and useful
3	3	3	3	3	3	3	3	3	3	3	3	3	3	3	3	Her şey gayet iyi	Everything is fine
4	4	4	4	4	4	4	4	4	4	4	4	4	4	4	4	yok	no
4	4	4	4	4	4	4	4	4	4	4	4	4	4	4	4	MATERYAL GELİŞTİRME DERSİ ÇOK ZEVKLİ KEYİFLİ BİR DERSTİ UYGULAMALI BİR ŞEKİLDE GÜZEL ETKİNLİKLER ÇIKARDIK.CEREN HOCAMIN YARDIMLARI DENEYİMLERİYLE ÇOK FAYDALI BİR DERSTİ.	MATERIAL DEVELOPMENT COURSE WAS A VERY ENJOYABLE AND ENJOYABLE COURSE WE DID NICE ACTIVITIES IN A PRACTICAL MANNER. IT WAS A VERY USEFUL COURSE WITH THE HELP OF MY TEAM CEREN AND HER EXPERIENCES.
4	4	4	4	4	4	4	4	4	4	4	4	4	4	4	4	Emekleriniz için teşekkür ederim hocam. Sınavlarda yüks2k başarı gösteremesem de çoo çalıştığım bir dönemdi.	Thank you for your efforts, sir. Even though I did not have high success in the exams, it was a period when I worked hard.
4	4	3	4	3	4	4	4	4	3	3	3	3	3	3	3	Bu dersten memnun kaldım. Ders içeriğinde sorun yok.	I enjoyed this course. There is no problem with the course content.
4	4	4	4	2	4	4	4	4	4	4	4	4	4	4	4	Ders notlarındaki soru çözümleri yeterince anlaşılır değil.	The solutions to the questions in the lecture notes are not clear enough.
1	1	1	1	1	1	1	1	1	1	1	1	1	1	1	1	Hocamıza slaytları bizim için kelimesi kelimesine OKUDUĞU için çok teşekkür ediyorum	I would like to thank our teacher for READING the slides word for word for us.
3	3	4	4	4	2	2	4	4	4	4	4	4	4	4	4	Kendi kendime öğrenmeye çalıştığım bir ders oldu. Ek olarak da pratik derslerindeki hocalarımdan öğrendiklerimle bu dersi çalışmaya çalıştım.	It was a lesson I tried to learn on my own. Additionally, I tried to study this course with what I learned from my teachers in practical classes.
4	4	4	4	4	4	4	4	4	4	4	4	4	4	4	4	Gerek 4 yıllık eğitim hayatı, gerek mezun olduktan sonra yapabilecek olduğumuz potansiyel iş veya işler hakkında bilgi edindiğimiz güzel bir bailangıç oldu.	It was a good start where we learned about both the 4-year education life and the potential job or jobs we could do after graduation.
3	3	3	3	3	3	3	3	3	3	3	3	3	3	3	3	Sanki yüksek lisans öğrencisine ders anlatır gibi anlatılmasa ve gereksiz detaylarda boğulmasak daha keyifli bir ders olabilirdi.	It would have been a more enjoyable course if it had not been explained as if we were giving a lecture to a graduate student and if we had not drowned in unnecessary details.
4	4	4	4	4	4	4	4	4	4	4	4	4	4	4	4	Hocamıza emeklerinden dolayı teşekkür ediyorum.	I thank our teacher for his efforts.
4	4	4	4	4	4	4	4	4	4	4	4	4	4	4	4	Güzel bir stajdı	It was a good internship
4	4	4	4	4	4	4	4	4	4	4	4	4	4	4	4	süper	Super
4	4	4	4	4	4	4	4	4	4	4	4	4	4	4	4	Çok iyi	Very good
3	2	2	3	2	1	2	2	3	2	2	2	2	2	2	2	Dönem içinde alacağımız en önemli derslerden birinde yine ne yaptığımızı anlamakta çok zorlandık. Yaptığımız bazı şeylerin sebebini hâlâ anlayabilmiş değiliz. Yönergelerin çok karışık olması da bunun sebeplerinden biri. Ayrıca sınavınızın da gerçekten ögrendiklerimizi ölçmeye yaradığını düşünmüyorum.	We had a hard time understanding what we were doing in one of the most important courses we will take during the semester. We still don't understand the reason for some of the things we do. One of the reasons for this is that the instructions are very complicated. Also, I don't think your exam really measures what we've learned.
3	3	3	3	3	3	3	3	3	3	3	3	3	3	3	3	Hocamız saygıya önem veren kuralcıydı ama bu tutumu sınıfın diğer derslerdeki düzenine göre daha çok dinlememize neden oluyordu	Our teacher was a rule-maker who gave importance to respect, but this attitude caused us to listen more than the order of the class in other classes.
3	3	3	3	3	3	3	3	3	3	3	3	3	3	3	3	Sınavları çok detay bilgiye dayanıp kitabı okusanız dahi hoca tüm kitabı ezberlememizi istiyor. Meslek hayatımızda basit bir mevzuat taramasıyla uygulayabileceğimiz bilgileri ezberlememiz ne kadar doğru?	Even if the exams are based on very detailed information and you read the book, the teacher wants us to memorize the entire book. How correct is it for us to memorize information that we can apply in our professional lives with a simple review of legislation?
4	4	4	4	4	4	4	4	4	4	4	4	4	4	4	4	Hoca?nın ders anlatışı ders içi öğretimi çok iyiydi mükemmeldi bana çok şey kattı çok teşekkür ederim	The teacher's lecture and in-class teaching were very good, it was perfect, it added a lot to me, thank you very much.
4	4	4	4	4	4	4	4	4	4	4	4	4	4	4	4	Yok	None
4	4	4	4	4	4	4	4	4	4	4	4	4	4	4	4	Teşekkürler hıcam	Thank you, my dear.
3	3	3	3	3	3	3	3	3	3	3	3	3	3	3	3	Sevdiğim bir dersti	It was a lesson I liked.
4	4	4	4	4	4	4	4	4	4	4	4	4	4	4	4	İyi	Good
3	3	3	3	3	3	3	3	3	3	3	3	3	3	3	3	İYİ	GOOD
4	4	4	4	4	4	4	4	4	4	4	4	4	4	4	4	İyi	Good
4	3	3	4	4	3	2	3	2	2	2	2	2	2	2	2	Memnunum	I'm satisfied
4	4	4	4	4	4	4	4	4	4	4	4	4	4	4	4	İyi tatiller	Have a nice holiday
4	3	4	4	4	4	1	4	4	4	4	4	4	4	4	4	lab raporlarından aldığım notları online olarak öğrenemedim. Bu sebeple yanlış ya da doğru yaptığım şeyleri anlayamadım, bu konuda biraz zorlandım. Teşekkürler.	I could not find out the notes I took from the lab reports online. For this reason, I could not understand what I did wrong or right, and I had a little difficulty in this regard. Thanks.
4	4	4	4	4	4	4	4	4	4	4	4	4	4	4	4	Güzel bir dönemdi.	It was a good time.
4	4	4	4	4	4	4	4	4	4	4	4	4	4	4	4	Dersin içeriği zengindi, hocamız ilgiliydi, birçok konuda bilgi edinmemi sağladı.	The content of the course was rich, our instructor was caring, and helped me gain knowledge on many subjects.
4	4	4	4	4	4	4	4	4	4	4	4	4	4	4	4	olumlu	positive
4	4	4	4	4	4	4	4	4	4	4	4	4	4	4	4	dersi çok sevdim ama zordu. öğretim üyesinin sadece slyt okuması dersin verimini baya düşürdü	I loved the course but it was difficult. The lecturer's reading only slides greatly reduced the efficiency of the course.
4	4	4	4	4	4	4	4	4	4	4	4	4	4	4	4	İyi	Good
4	4	4	4	4	4	4	4	4	4	4	4	4	4	4	4	GÜZEL	BEAUTIFUL
3	3	3	3	3	3	3	3	3	3	3	3	3	3	3	3	Yok	None
1	1	1	1	1	1	1	1	1	1	1	1	1	1	1	1	Dersin gerekli olduğunu düşünmüyorum	I don't think the course is necessary
3	3	3	3	3	2	3	3	3	3	3	3	3	3	3	3	yüzyüze eğitim kesinlikle online eğitime göre çok daha iyi	Face-to-face education is definitely better than online education.
4	4	4	4	4	4	4	4	4	4	4	4	4	4	4	4	Hocamız dersi anlayabilmemiz için en iyi şekilde işliyor	Our teacher works in the best possible way so that we can understand the lesson.
2	2	2	2	2	2	2	2	2	2	2	2	2	2	2	2	güzel	Beautiful
4	3	4	4	4	3	3	4	4	3	3	3	3	3	3	3	Dersin içeriği, öğretmenlerin anlatımı, verilen ödevler konuyu anlamama ve diğer derslere çok yardımcı oldu fakat uzaktan eğitimde internet bağlantısı yüzünden kesintiler oldu. Bu yüzden sıkıntılar çıktı. Dersten zaman kaybı yaşandı. Fakat öğretmenin anlatımı iyiydi.	The content of the course, the teachers' explanations, and the homework given helped me understand the subject and other courses, but there were interruptions in distance education due to the internet connection. That's why problems arose. There was a waste of class time. But the teacher's explanation was good.
2	2	2	2	2	2	2	2	2	2	2	2	2	2	2	2	Vize puanlaması çok düşük tutuldu dersi geçmemiz sadece final sınavına bırakıldı 252 slayttan 4 klasik soru soruldu sınavla ilgili tek bilgilendirilmemiz bu kadardı. Ödev proje puan alabileceğimiz hiçbir uygulama yapılmadı.	The midterm scoring was kept very low and passing the course was left only to the final exam. 4 classic questions out of 252 slides were asked. This was the only information we were informed about the exam. There was no application that could allow us to get points for homework projects.
4	4	4	4	4	4	4	4	4	4	4	4	4	4	4	4	Güzel bir dönem geçirdim emeği geçen herkese teşekkür ederim..	I had a great time. Thank you to everyone who contributed.
4	4	4	4	4	4	4	4	4	4	4	4	4	4	4	4	Çok iyi	Very good
4	4	4	4	4	4	4	4	4	4	4	4	4	4	4	4	Herşey için çok teşekkürler:)	Thank you very much for everything :)
4	4	4	4	4	4	4	4	4	4	4	4	4	4	4	4	Harika	Great
4	4	4	4	4	4	4	4	4	4	4	4	4	4	4	4	Bazı hocaların nasıl zorlayabiliriz diye düşünüp kasten bazı sorularda takla attığını düşünüyorum. Yakın tarihe aşırı ilgili olan birisi olarak ben bazı soruları hiç anlayamadım. Eminim Atatürk dirilse o da anlayamazdı	I think some teachers deliberately skipped some questions, thinking about how they could force it. As someone who is extremely interested in recent history, I could not understand some of the questions. I'm sure if Atatürk was resurrected, he wouldn't understand either.
1	1	1	1	1	1	1	1	1	1	1	1	1	1	1	1	Tez de hiç yardım edilmedi, her şeyi kendim yaptım	There was no help in the thesis, I did everything myself
4	4	4	4	4	4	4	4	4	4	4	4	4	4	4	4	Herşey için çok teşekkürler hocam güzel bir dönemdi:)	Thank you very much for everything, sir, it was a good time :)
4	4	4	4	4	4	4	4	4	4	4	4	4	4	4	4	İlave görüşüm bulunmamaktadır	I have no additional comments
2	2	2	2	2	2	2	2	2	2	2	2	2	2	2	2	DERS İÇERİĞİNİN AĞIR OLUŞU VE DERS SAAT SAYISI İLE ÇELİŞMESİ DURUMUNDAN KAYNAKLI DERS BAŞARISI DÜŞÜYOR. AYRICA UZAKTAN EĞİTİMYÜRÜTÜLÜRKEN YAŞ OLARAK BÜYÜK OLAN HOCALARIMIZ SİSTEMİ KULLANMAKTA GÜÇLÜK ÇEKTİ BU DA OLUMSUZ OLARAK YANSIDI. AYRICA DERS METARYELLERİ OLAN SLAYTLAR MODDLE SİSTEMİNE YÜKLENMEDİĞİ İÇİN BÜYÜK BİR KARGAŞA OLUŞTU.	COURSE SUCCESS IS DECREASING DUE TO THE HEAVY COURSE CONTENT AND ITS CONFLICT WITH THE NUMBER OF CLASS HOURS. IN ADDITION, WHEN DISTANCE EDUCATION WAS CONDUCTED, OUR OLDER TEACHERS HAD DIFFICULTY USING THE SYSTEM, AND THIS REFLECTED NEGATIVELY. IN ADDITION, A HUGE CONFUSION CREATED BECAUSE THE SLIDES, WHICH ARE THE COURSE MATERIALS, WERE NOT UPLOADED TO THE MODDLE SYSTEM.
4	4	4	4	4	4	4	4	4	4	4	4	4	4	4	4	öğretim elemanının ilgisi çok güzel ders konusunda etkili öğrenim sağlayabilen hocalardan biri. ilgisi için teşekkür ederim.	The instructor's attention is very good and he is one of the professors who can provide effective learning about the course. Thank you for your interest.
3	3	3	3	3	3	3	3	3	3	3	3	3	3	3	3	Çok iyi	Very good
4	4	4	4	4	4	4	4	4	4	4	4	4	4	4	4	Dersin içeriği yeterliydi. Derslere ulaşımda zorluk yaşamadım.	The content of the course was sufficient. I had no difficulty in reaching classes.
4	4	4	4	4	4	4	4	4	4	4	4	4	4	4	4	İyi	Good
4	4	4	4	4	4	4	4	4	4	4	4	4	4	4	4	Hocamızın notları, dersleri harika, teşekkür ederim çok güzel bir dönemdi.	Our teacher's notes and lessons are great, thank you, it was a great semester.
4	4	4	4	4	4	4	4	4	4	4	4	4	4	4	4	Gayet iyi bir sistem	A very good system
3	3	3	3	3	3	3	3	3	3	3	3	3	3	3	3	Gayet iyi	pretty good
3	3	3	3	3	3	3	3	3	3	3	3	3	3	3	3	Online olması daha iyi	It's better online
4	4	4	4	4	4	3	3	3	3	3	3	3	3	3	3	Ders faydalı bir dersti	The lesson was a useful lesson
4	4	4	3	3	4	4	3	3	3	3	3	3	3	3	3	Öğrencilerin maillerine cevap vermez, verirse kızar, anlaşması zordur. Doğru tektir kavramını benimser ve sınav ve ödevlerde kendi dediği harici doğru cevapları kabul etmez. Tek tip öğrenci olsak suç, düşünsek suç.	He does not respond to students' e-mails; if he does, he gets angry and is difficult to get along with. He adopts the concept that there is only one right answer and does not accept correct answers other than his own in exams and assignments. It would be a crime if we were a single type of student, it would be a crime if we thought about it.
4	4	4	4	4	4	4	4	4	4	4	4	4	4	4	4	iyi	Good
4	4	4	4	4	4	4	4	4	4	4	4	4	4	4	4	kakallakakalkaklal	kakallakakalkaklal
3	3	3	3	3	4	3	3	3	3	3	3	3	3	3	3	Ders keyifli ve yararlı bir dersti ders hocamıza teşekkürlerimi sunarım	The course was an enjoyable and useful lesson. I would like to thank our instructor.
4	4	4	4	4	4	4	4	4	4	4	4	4	4	4	4	Öğretmenim çok iyidi çok teşekkür ederim	My teacher was very good, thank you very much
4	4	4	4	4	4	4	4	4	4	4	4	4	4	4	4	Hocamız çok bilgiliydi. Dersin içeriği de aynı şekilde bilgilendiriciydi.	Our teacher was very knowledgeable. The content of the course was equally informative.
4	4	4	4	4	4	4	4	4	4	4	4	4	4	4	4	Teşekkür ederim	Thank you
4	4	4	4	4	4	4	4	4	4	4	4	4	4	4	4	Tamam	Ok
1	1	1	1	1	1	1	1	1	1	1	1	1	1	1	1	Öğrenci dostu olmayan ve öğrencilerle iletişim kuramayan kötü bir akademisyen en yakın zamanda ayrılması dileğiyle.	He is a bad academician who is not student-friendly and cannot communicate with students. I hope he leaves as soon as possible.
4	4	4	4	4	4	4	4	4	4	4	4	4	4	4	4	Bu dersi iyi ki almışım hocasıda çok iyi	I'm glad I took this course and the teacher is very good.
4	4	4	4	4	4	4	4	4	4	4	4	4	4	4	4	verimli dersler için teşekkür ederim.	Thank you for the productive lessons.
4	4	4	4	4	4	4	4	4	4	4	4	4	4	4	4	Hayatımda derse girmekten zevk aldığım heyecanlandığım derslerden birisiydi	It was one of the courses in my life that I enjoyed attending and was excited about.
3	3	3	3	2	2	2	3	3	3	3	3	3	3	3	3	Hocamızın öys?ye yüklediği sunumlar özetin de özeti olduğu için bazı konuları tümüyle ele alıp anlamakta güçlük çektik, sınavımıza çalışırken bu durum bizi çok zorladı	Since the presentations that our teacher uploaded to the ÖMS were summaries of the presentations, we had difficulty in understanding some of the topics completely, and this made it very difficult for us while studying for our exam.
4	4	4	4	4	4	4	4	4	4	4	4	4	4	4	4	EMEKLERİNİZDEN DOLAYI ÇOK TEŞEKKÜR EDERİM HOCAM.	THANK YOU VERY MUCH FOR YOUR EFFORTS, SIR.
4	4	4	4	4	4	4	4	4	4	4	4	4	4	4	4	Ders içeriğine uygun olarak olması gerektiği gibi işlendi.	The course was taught as it should be, in accordance with the content.
4	4	4	4	4	4	4	4	4	4	4	4	4	4	4	4	Hocamızın bizlerle iletişimi ve ders işleme şekli gayet güzeldi. Çok memnun kaldım.	Our teacher's communication with us and the way he taught the lesson was very good. I was very pleased.
4	4	4	4	4	4	4	4	4	4	4	4	4	4	4	4	Çok memnunum	I am very satisfied
3	3	3	3	3	3	3	3	3	3	3	3	3	3	3	3	Final sınavında 20 soru 30 dakikalık bir süreç vardı ve sorular kesinlikle üzerinde düşünülmesi, vakit harcanması gereken sorulardı. Fakat bana böyle bir imkan verilmediği için bu dersten kalma ihtimalim var, gerçekten üzgünüm.	The final exam had 20 questions and a 30-minute period, and the questions were definitely questions that needed to be thought about and spent time on. But since I was not given such an opportunity, there is a possibility that I may fail this course, I am really sorry.
4	4	4	3	4	4	4	4	4	4	4	4	4	4	4	4	güzel ve etkili bir dersti	It was a nice and effective lesson
4	4	4	4	4	4	4	4	4	4	4	4	4	4	4	4	Bu dersten kötü not alacsk olmak beni üzdü doğrusu	It really saddens me that I will get bad grades in this course.
2	4	4	4	4	4	4	4	4	4	4	4	4	4	4	4	Dersler çok verimli geçti. Hocama sonsuz teşekkürler, sayğılar.	The lessons were very productive. Endless thanks to my teacher, best regards.
4	3	3	2	2	3	2	4	4	3	3	3	3	3	3	3	dersde ödev olunmaması çok büyük bir eksikti, vize/final oranlaması da kötüydü. ayrıca online sistem yapılmasının acısının bizlerden çıkarılması çok üzücü.sistemin getirilmesini istemedik ama geldi,bizler içinde mental olarak zor bi dönemdi. online olduğu için sınavların çok daha zor yapılması. öğrencilere zaten yapamayacaksınız gibi bir tavır takınılması kabul edilemez. sınıfta gelen öğrencilere…	Not having homework in class was a huge deficiency, and the midterm/final ratio was also bad. Also, it is very sad that the pain of creating an online system was taken away from us. We did not want the system to be introduced, but it came, it was a mentally difficult period for us. Exams are much more difficult because they are online. It is unacceptable to treat students like they can't do it an…
4	4	4	4	4	4	4	4	4	4	4	4	4	4	4	4	Hocamıza teşekkür ederim katkılarından dolayı	I thank our teacher for his contributions.
3	3	3	3	3	3	3	3	3	3	3	3	3	3	3	3	Hayata yönelik bilgi vericiAktif bir dersti	It was an informative and active lesson about life.
4	4	4	4	4	4	4	4	4	4	4	4	4	4	4	4	Yazacak çok şey var ama değiştirecek birileri yok. Sevgiler.	There is a lot to write, but there is no one to change it. Best regards.
4	4	4	4	4	4	4	4	4	4	4	4	4	4	4	4	Sınıf içinde toplum çalışmalarıyla ilgili daha fazla vaka çalışmalarına yer verilmelidir.	More case studies related to community studies should be included in the classroom.
4	4	4	4	4	4	4	4	4	4	4	4	4	4	4	4	Her şey için teşekkürler hocam	Thank you for everything, sir.
4	4	4	4	4	4	4	4	4	4	4	4	4	4	4	4	Dönem çok verimli ve sorunsuz geçti. Sayın hocam iletişime çok açıktı ve bize her daim yardım etti. Kendisine teşekkür ediyorum.	The period was very productive and trouble-free. My dear teacher was very open to communication and always helped us. I thank him.
4	4	4	4	4	4	4	4	4	4	4	4	4	4	4	4	İyi bi dersti	It was a good lesson
4	4	4	4	4	4	4	4	4	4	4	4	4	4	4	4	Emeğinize sağlık teşekkür ederiz	Thank you for your hard work
4	4	4	4	4	4	4	4	4	4	4	4	4	4	4	4	Taşıtlarla ilgili daha çok tasarım örnekleri verilebilirdi. Dışarıdan bi konuk gelebilir farklı görüş açılarıyla daha çok bilgi paylasmi yapilabilirdi	More design examples for vehicles could have been given. A guest from outside could come and share more information from different perspectives.
4	4	4	4	4	4	4	4	4	4	4	4	4	4	4	4	Teşekkürler	Thanks
4	4	4	4	4	4	4	4	4	4	4	4	4	4	4	4	Dersin işleniş şekli gayet anlaşılırdı. Hocamız da çok donanımlı ve anlayışlıydı.	The way the lesson was taught was very understandable. Our teacher was also very knowledgeable and understanding.
4	4	4	4	4	4	4	4	4	4	4	4	4	4	4	4	Ders boyunca öğrendiğim bilgiler öğretmenimizin tutumu ve ilgisi gerçekten çok tatmin ediciydi. İşlediğimiz her konunun gündelik hayattaki örnekleri üzerinde durularak konular pekiştirilmiş oldu. Çok güzel bir dönem geçirdik uzaktan eğitim sürecinde öğretmenimiz derslere katlımamız konusunda çok teşvik ediciydi. Her şey için teşekkür ederim.	The information I learned during the course and our teacher's attitude and interest were truly satisfying. The topics were reinforced by focusing on daily life examples of each topic we covered. We had a very good semester, our teacher was very encouraging us to attend the lessons during the distance education process. Thank you for everything.
4	4	4	4	4	4	4	4	4	4	4	4	4	4	4	4	Hocamız çok tatlı bir insandı biraz zorlandığım bir dersti ama kendisine teşekkür ederim	Our teacher was a very sweet person, it was a lesson that I had a little difficulty with, but I thank him.
4	4	4	4	4	4	4	4	4	4	4	4	4	4	4	4	Teşekkürler çok başarılı bir ders oldu.	Thank you, it was a very successful lesson.
4	3	4	4	4	4	4	4	4	4	4	4	4	4	4	4	Emekleriniz için çok teşekkür ederim. Saygılarımla	Thank you very much for your efforts. Kind regards
4	4	4	4	4	4	4	4	4	4	4	4	4	4	4	4	ders genel olarak zor bir ders ama hocanın konuları anlatışı çok iyi ve anlaşılır	The course is generally a difficult course, but the teacher's explanation of the subjects is very good and understandable.
3	3	3	3	2	3	2	3	3	2	2	2	2	2	2	2	bu ders çok zor.	This course is very difficult.
3	3	3	3	3	3	3	3	3	3	3	3	3	3	3	3	Verimliydi	It was productive
4	4	4	4	4	4	4	4	4	4	4	4	4	4	4	4	Hocamın anlatımı gayet anlaşılırdı.Ders zor bir ders ama hocamız olabildiğince kolaylık sağladı.	My teacher's explanation was very understandable. The course was a difficult one, but our teacher made it as easy as possible.
4	4	4	4	4	4	4	4	4	4	4	4	4	4	4	4	öğretmenin dersi işleyişi iyidi	The teacher taught the lesson well
4	4	4	4	4	4	4	4	4	4	4	4	4	4	4	4	Bölümümde yaptığım en verimli şey	The most productive thing I did in my department
4	3	4	4	4	3	3	3	3	2	2	2	2	2	2	2	Z	Z.
3	3	3	3	2	3	2	3	3	2	2	2	2	2	2	2	hoca bizi bıraktı gitti	The teacher left us and went away
4	4	4	4	4	4	4	4	4	4	4	4	4	4	4	4	lşojkhok	lshojkhok
4	4	4	4	4	3	4	3	4	4	4	4	4	4	4	4	Çok fazla sorumluluk vardı gerçekten. Raporu sunsak yeterdi bence. Turnitine gerek yoktu diye düşünüyorum. Ya da vize olmasaydı	There was really a lot of responsibility. I think it would be enough if we presented the report. I think Turnitin was not needed. Or if there was no visa
4	4	4	4	4	4	4	4	4	4	4	4	4	4	4	4	Saygıdeğer Hocam, katkılarınızdan, emeklerinizden dolayı sizlere çok teşekkür eder, 2024 yılının sağlık, mutluluk ve yeni görev yeriniz de başarılarla dolu bir akademik yıl geçirmenizi temenni ederim. Saygılarımla...	Dear Professor, I would like to thank you very much for your contributions and efforts, and I hope that 2024 will be an academic year full of health, happiness and success in your new position. Kind regards...
4	4	4	3	4	4	3	4	4	4	4	4	4	4	4	4	Öğretim elemanı konusuna çok hakimdi. Teşekkür ederim.	The instructor was very knowledgeable about his subject. Thank you.
4	4	4	4	4	4	4	4	4	4	4	4	4	4	4	4	Yüzyüze	face to face
3	4	4	4	4	4	3	4	4	4	4	4	4	4	4	4	Vize sınavının 4 soru klasik olması konusunda çok zorlandık. klasik olsa bile soru sayısı arttırılabilirdi. sınava çok çalışmama rağmen bilgilerimi soruya dökemedim.	We had a hard time making the midterm exam 4 questions classic. Even if it was a classic, the number of questions could have been increased. Even though I studied hard for the exam, I could not put my knowledge into the question.
4	4	4	4	4	4	4	4	4	4	4	4	4	4	4	4	yok	no
4	3	3	3	3	2	3	4	4	4	4	4	4	4	4	4	Dersi anlatıp gidiyor yoksa hocamız çok bilgili donanımlı farkındayız ama bizi teşvik eden bir hoca değil	We know that our teacher is very knowledgeable and equipped, but he is not a teacher who encourages us.
4	4	4	4	4	4	4	4	4	4	4	4	4	4	4	4	Gayet iyi	pretty good
4	4	4	4	4	4	4	4	4	4	4	4	4	4	4	4	YOK	NO
3	3	3	3	3	3	4	4	4	4	4	4	4	4	4	4	Çok özel sağlam bilgili faydalı dönem oldu.	It was a very special, solid, knowledgeable and useful period.
4	4	4	4	4	4	4	4	4	4	4	4	4	4	4	4	İyiydi	it was good
4	4	4	4	4	4	4	4	4	4	4	4	4	4	4	4	sınavlar zor oluyor	exams are difficult
4	4	4	4	4	4	4	4	4	4	4	4	4	4	4	4	Biraz fazla detaycı bir anlatım olmasa daha rahat bir anlatım olur	It would be a more comfortable explanation if it wasn't a bit too detailed.
3	3	3	3	3	3	3	3	3	3	3	3	3	3	3	3	KOLAY BİR DERS	AN EASY LESSON
4	4	4	4	4	3	3	4	4	4	4	4	4	4	4	4	Bu dersi seviyorum ama matemetiğim iyi olmadığı için denklem kurma konusunda iyi değilim ama konusunun mantığını anlayabiliyorum . Öğrenciler yeteneğine göre değerlendirilmesi daha iyi olur diye düşünüyorum .	I like this course, but since I am not good at mathematics, I am not good at creating equations, but I can understand the logic of the subject. I think it would be better to evaluate students according to their abilities.
2	3	3	3	1	1	1	3	3	1	1	1	1	1	1	1	Ders saati çok geçti , dönem boyunca magdur olduk .	It was too late for class, we were victims throughout the semester.
4	4	4	4	4	4	4	4	4	4	4	4	4	4	4	4	Hocamiz cok guzel bir insan, dersi cok iyi anlatiyor bilgi aktarimi basarili ve bilgili birisi	Our teacher is a very nice person, he explains the lesson very well, he is successful in conveying information and he is knowledgeable.
4	4	4	4	4	4	4	4	4	4	4	4	4	4	4	4	Çok verimli bir dersti.	It was a very productive lesson.
4	4	4	4	4	4	4	4	4	4	4	4	4	4	4	4	Teşekkürler	Thanks
3	3	3	3	3	3	3	3	3	3	3	3	3	3	3	3	İyi	Good
4	4	4	4	4	4	4	4	4	4	4	4	4	4	4	4	Sunum tekniklerini öğretim elemanı sayesinde çok fazla pekiştirdik ve makale nasıl okunur özeti nasıl çıkarılır hocamızın geri dönütleri sayesinde hakim olduğumuzu düşünüyorum.	We have reinforced the presentation techniques a lot thanks to the instructor, and I think we have mastered how to read an article and how to make a summary, thanks to our instructor's feedback.
4	4	4	4	4	4	4	4	4	4	4	4	4	4	4	4	İYİYDİ	IT WAS GOOD
4	4	3	4	4	4	3	3	4	4	4	4	4	4	4	4	Herşey çok iyidi hocamıza teşekkürler.	Everything was very good, thank you teacher.
3	3	3	3	3	3	3	3	3	3	3	3	3	3	3	3	Güzeldi biraz daha geliştirilebilir.okulda internet cekse	It was good, it could be improved a little more. I wish there was internet at the school.
2	2	2	2	2	2	2	2	2	2	2	2	2	2	2	2	The	the
4	4	4	4	4	4	4	4	4	4	4	4	4	4	4	4	Öğrenim açısından ve beceri açısından olumlu geçen bir dersti.	It was a positive course in terms of learning and skills.
3	3	3	3	2	4	4	4	4	4	4	4	4	4	4	4	Ders sadece ezber üzerine. Powerpoint slaytları okuyup geçiyoruz. Sadece bu ders için değil, çoğu ders için bu şekilde ders işliyoruz. tüm öğrenciler çok bunalıyor ve dersle ilgilenmiyor. Biraz daha yoruma dayalı olup biraz daha az ezber olsa çok daha iyi olur.	The lesson is just about memorization. We read powerpoint slides and move on. We teach this way not only for this course, but for most courses. All students are very bored and not interested in the lesson. It would be much better if it was a little more interpretation-based and a little less memorized.
4	4	4	4	4	4	4	4	4	4	4	4	4	4	4	4	hocam cok iyiydi	My teacher was very good
3	3	3	3	3	3	3	3	3	3	3	3	3	3	3	3	Zaten örgütsel davranış dersi alan öğrenciler için saçma ve gereksiz oluyot bu dersi almak. Hocamız dersi hiç ayağa kalkmadan anlattığı için biraz odak kaybı yaşıyor sınıf. Sınavları translateden çeviri yaparak hazırlıyo hocamız ve bu yüzden yüklem cümlenin başında falan oluyor anlaması güç oluyor	It would be absurd and unnecessary for students who already take organizational behavior courses to take this course. The class loses a bit of focus because our teacher teaches the lesson without standing up. Our teacher prepares the exams by translating from a translator, and that's why the predicate is at the beginning of the sentence, making it difficult to understand.
4	4	4	4	4	4	4	4	4	4	4	4	4	4	4	4	dünyanın en tatlı ve iyi niyetli hocası	The sweetest and most well-intentioned teacher in the world
3	2	4	4	4	4	4	4	4	4	4	4	4	4	4	4	Ders kapsamında dersin adından dolayı bu dersi almıştım. Bölüme yakın olduğu için. Hocam slaytlarınız çok uzun ve hiçbir şekilde kolaylık sağlamadınız. Kopyalar oldu. Fakat sizleri çok sevdim. Her şey için teşekkür ederimm.	I took this course because of the name of the course. Because it is close to the department. Sir, your slides are very long and you did not provide any convenience. There were copies. But I loved you very much. Thank you for everything.
4	4	4	4	4	4	4	4	4	4	4	4	4	4	4	4	Dersten inanılmaz keyif aldım tüm öğretmenlerime teşekkür ediyorum	I enjoyed the course immensely, I thank all my teachers.
4	4	4	4	4	2	4	4	4	2	2	2	2	2	2	2	Bence dersin içeriği zordu. Ve sohbetle karışık anlatıldığı için ben anlamakta güçlendim. Hocamız çok bilgili ve iyi öğretiyor ama ders yüzünden arkada bir slayt olsa ve onunla birlikte gidilse daha anlaşılır olabilirdi bence.	I think the content of the course was difficult. And since it was explained in a mixed conversation, I became stronger in understanding it. Our teacher is very knowledgeable and teaches well, but I think it would be more understandable if there was a slide at the back of the lecture and we went with it.
4	4	4	4	4	4	4	4	4	4	4	4	4	4	4	4	Başkent Üniversitesi ve Sermaye Piyasaları Bölümü ile öğrendiğim derslerden memnun kaldım, hocama teşekür ederim.	I was pleased with the lessons I learned at Başkent University and the Capital Markets Department, I thank my teacher.
4	4	4	4	4	4	4	4	4	4	4	4	4	4	4	4	ISO 9001 standardını neredeyse ezbere bilen konusuna hakim bir öğretim görevlisi ile ders işledik.	We taught with a lecturer who is knowledgeable about his subject and knows the ISO 9001 standard almost by heart.
3	3	3	3	3	4	4	4	4	4	4	4	4	4	4	4	tıp etiği yerine moleküler biyoloji ve genetik bölümüne daha uygun etik konular seçilebilir	Ethical topics that are more suitable for the molecular biology and genetics department can be chosen instead of medical ethics.
3	3	3	3	3	3	3	3	3	3	3	3	3	3	3	3	Öğretmen çok iyiydi, kullanılan kitap biraz yetersiz bence	The teacher was very good, I think the book used was a bit inadequate
4	4	4	4	4	4	4	4	4	4	4	4	4	4	4	4	Hocamdan memnunum	I am happy with my teacher
4	4	4	4	4	4	4	4	4	4	4	4	4	4	4	4	Başkent Üniversitesi ve Sermaye Piyasaları Bölümü ile öğrendiğim derslerden memnun kaldım, hocama teşekür ederim.	I was pleased with the lessons I learned at Başkent University and the Capital Markets Department, I thank my teacher.
4	4	4	4	4	4	4	4	4	4	4	4	4	4	4	4	Gayet iyi bir başlangıçtı	It was a pretty good start.
4	4	4	4	4	4	4	4	4	4	4	4	4	4	4	4	Ders olması gereken şekilde işlendi.	The lesson was taught as it should have been.
3	3	3	3	2	3	3	3	3	2	2	2	2	2	2	2	bu ders için moodle a yüklenen slaytların tam anlamıyla yeterli olmayışı bence bir problemdi. Öğretim elemanı ben slaytlarımı özet şeklinde yüklüyorum derse gelmeyen öğrenemez gibi bir ifade kullandı. demek istediğim derse gitmeyip slaytlara çalışalım değil daha ziyade önceki haftalara yönelik bir bilgiye ihtiyacımız olduğu zaman slaytların çokta bir yardımı dokunmadı çünkü hepsi genel başlıklard…	I think it was a problem that the slides uploaded to moodle for this course were not fully sufficient. The instructor said, "I upload my slides in summary form, but those who don't come to class can't learn." What I mean is not that we should not go to class and study the slides, but rather that when we needed information about the previous weeks, the slides did not help much because they were al…
3	1	1	1	1	1	1	3	4	4	4	4	4	4	4	4	Derse karşı ilgimin olması sebebiyle her derse duzenli olarak aktif olarak katıldım. AHocamız normalde derse aktif olarak katılanlara 5 puan veriyor. ben son 5 haftada elimden geldiğince aktifvolarak katilmama rağmen hiç bir derste 5 puan alamadım. Bu konuda adaletsizlik olduğunu dusunuyorum. Ayrıca hocamız derslerde tip fakültesinin slaytindsn ders anlattı. Bu dersi dersi anlamamzi zorlaştırdı. …	Because I was interested in the course, I actively attended every lecture regularly. AOur teacher normally gives 5 points to those who actively participate in the lesson. Even though I participated as actively as I could in the last 5 weeks, I could not get 5 points in any course. I think there is injustice in this regard. In addition, our teacher lectured from the slides of the faculty of medici…
3	3	3	3	3	3	3	3	3	3	3	3	3	3	3	3	Tamam	Ok
3	3	3	3	3	3	3	3	3	3	3	3	3	3	3	3	Güzel	Beautiful
4	4	4	4	4	4	4	4	4	4	4	4	4	4	4	4	Teşekkürler	Thanks
3	3	3	3	3	3	3	3	3	3	3	3	3	3	3	3	keyifli be faydalı bir dersti	It was an enjoyable and useful lesson.
4	4	4	4	4	4	4	4	4	4	4	4	4	4	4	4	Bu dersle alakalı hiçbir sıkıntı yaşamadım	I had no problems with this course.
4	4	4	4	4	4	4	4	4	4	4	4	4	4	4	4	NE KADAR TEŞEKKÜR ETSEM AZDIR :) ÇOK TEŞEKKÜR EDERİM.	I CANNOT THANK YOU ENOUGH :) THANK YOU VERY MUCH.
3	3	3	3	3	3	3	3	3	3	3	3	3	3	3	3	Çok iyi	Very good
1	1	1	1	1	1	1	1	1	1	1	1	1	1	1	1	Keşke yaşlı olduğunuz kadar anlayışlı ve anlaşılır olup derse teşvik etseydiniz yaşıtlarınızın aksine , maalesef internette ki eğitim videoları daha eğitici kalıyor sizin yanınızda . Hayatınızda başarılar.	I wish you were as understanding and understandable as you are and encouraged the lesson, unlike your peers, unfortunately the educational videos on the internet remain more educational for you. Good luck in your life.
4	3	4	3	4	3	4	4	4	4	4	4	4	4	4	4	Guzel	Beautiful
1	1	1	1	1	1	1	1	1	1	1	1	1	1	1	1	Para tuzağı	money trap
4	4	4	4	4	4	4	4	4	4	4	4	4	4	4	4	iyi	Good
4	4	4	4	4	4	4	4	4	4	4	4	4	4	4	4	A	A.
3	3	3	3	3	3	1	3	3	3	3	3	3	3	3	3	Dersin sorumlu öğretim üyesine verilen ilk ödevlerden birinin konu anlatımı ve soru çözümü yapılmadan verildiğini, değerlendirmeye alınırken nasıl yapılacağını bilmeden yaptığımız bir ödev olduğunu ilettiğimizde; (bu problemi ileten öğrenciye) öğrencinin derse eksik gelmiş olabileceğini yani öğrencinin kendisinde bir bilgi eksikliği olabileceğini, laboratuvardan sorumlu hocalarınız anlatmışlardır…	When we told the faculty member in charge of the course that one of the first assignments given was given without explaining the subject and solving the questions, and that it was an assignment we did without knowing how to do it while being evaluated; We could not understand why he showed a very unconstructive attitude (to the student who reported this problem), saying that the student may have …
3	3	3	3	3	3	3	3	3	3	3	3	3	3	3	3	Dersler verimli geçti	The lessons were productive
3	3	3	3	3	3	3	3	3	3	3	3	3	3	3	3	Bizi geçirin	take us through
3	3	3	3	2	2	1	4	4	3	3	3	3	3	3	3	Eğitim iyiydi sınavda zorluk çektik ödev yükü çok fazlaydı değerlendirme düzgün yapılmadı.	The education was good, we had difficulties in the exam, the homework load was too much, the evaluation was not done properly.
4	4	4	4	4	4	4	4	4	4	4	4	4	4	4	4	U	u
4	4	4	4	4	4	4	4	4	4	4	4	4	4	4	4	Jj	jj
4	4	4	4	4	4	4	4	4	3	3	3	3	3	3	3	Dersin tüm hocaları ayrı ayrı çok başarılılar ve farmasötik kimyayı bana çok sevdirdiler. Bir lab ancak bu kadar güzel olabilirdi.	All the instructors of the course are very successful individually and they made me love pharmaceutical chemistry very much. A lab could only be this beautiful.
4	4	4	4	4	4	4	4	4	4	4	4	4	4	4	4	Her şey için teşekkür ederim çok güzel bi dönemdi	Thank you for everything, it was a great time.
4	4	4	4	4	4	4	4	4	4	4	4	4	4	4	4	Dersin sorumlusuna idari ve yönetimsel konularda gerekli bilgilerin verilmediğini düşünüyorum.Bu nedenle yönetimle aramızda kopukluk oluşmaktadır.	I think that the course instructor is not given the necessary information on administrative and managerial issues. For this reason, there is a disconnect between us and the administration.
4	3	3	2	2	3	3	3	2	2	2	2	2	2	2	2	Zor bir dersti	It was a hard lesson
4	4	4	4	4	4	4	4	4	4	4	4	4	4	4	4	Çok güzel	Very good
3	4	3	4	3	4	3	4	3	4	4	4	4	4	4	4	İyi	Good
2	3	3	3	2	3	3	3	3	3	3	3	3	3	3	3	tamam	Ok
4	4	4	4	4	4	4	4	4	4	4	4	4	4	4	4	X	X
4	4	4	4	4	4	4	4	4	4	4	4	4	4	4	4	Bu dersin öğrencilere bir şey kattığını düşünmüyorum. Öğrencilere İngilizce öğretmekten ziyade ezber yaptıran bir dersti. Benim fikrime göre dersin içeriği değiştirilebilir. Hocamız gayet iyiydi bize bir sunumun püf noktalarını iyi bir şekilde öğretti fakat dersin içeriği beni tatmin etmedi.	I don't think this course adds anything to students. It was a course that made students memorize rather than teach English. In my opinion, the content of the course can be changed. Our teacher was very good, he taught us the tricks of a presentation well, but the content of the course did not satisfy me.
4	4	4	4	4	4	4	4	4	4	4	4	4	4	4	4	Teşekkürler	Thanks
4	4	4	4	4	4	4	4	4	4	4	4	4	4	4	4	Ders genel olarak bana zor geldi ama hocamız bize baya kolaymış gibi anlattı. Zaten kendisi çok tatlı bir kadın	The course was generally difficult for me, but our teacher explained it to us as if it was very easy. She's already a very sweet woman.
3	3	3	3	3	3	3	3	3	3	3	3	3	3	3	3	Gayet iyi anlatım vardı notlar yeterli idi	The explanation was very good and the notes were sufficient.
4	4	4	4	4	4	4	4	4	4	4	4	4	4	4	4	İyi	Good
3	3	3	3	3	3	3	3	3	3	3	3	3	3	3	3	Teşekkürler	Thanks
4	4	4	4	4	4	4	4	4	4	4	4	4	4	4	4	Çok kaliteli bir hoca kendisine teşekkür ediyorum	He is a very good teacher, I thank him.
4	4	4	4	4	4	4	4	4	4	4	4	4	4	4	4	Hocamiz cok iyi	Our teacher is very good
1	1	1	1	1	1	1	1	1	2	2	2	2	2	2	2	Hocanın derse devamı yok denecek kadar azdı derste hiçbir şey öğrenemedik lablarda hep asistsn yardımcı oldu	The teacher's attendance was almost non-existent, we did not learn anything in class, he always assisted us in the labs.
4	3	3	3	3	3	3	4	4	4	4	4	4	4	4	4	olumlu	positive
4	4	4	4	4	4	4	4	4	4	4	4	4	4	4	4	Bölümümüzün temelini oluşturan bir dersti. Çok katkısı oldu. Ayrıca cihaz tanıtımlarının yapılması ilgi alanlarımızda ve derste farkındalık yarattı.	It was a course that formed the basis of our department. He contributed a lot. Additionally, device demonstrations created awareness in our areas of interest and in the course.
3	3	3	3	3	3	3	3	3	3	3	3	3	3	3	3	Dersi hiç almamışım gibi hissediyorum. Hocanın derslere katılımının azlığı ve konuları sıkıştırarak anlatması sürekli sürekli ödev yapmamız iyi bir dönem değildi	I feel like I never learned the lesson. It wasn't a good semester because the teacher's lack of participation in the classes, his explanation of the topics in a tight way, and our constant homework.
4	4	4	4	4	4	4	4	4	4	4	4	4	4	4	4	Ders içeriği son derece faydalı , eğitici ve yararlı idi.Hocamın konulara yaklaşımı , genel nitelikleri ile bize teorileri anlatımı ve örneklerle pekiştirmesi ve interaktif bir ders ortamı son derece faydalı ve verimli idi.Dersin adı teori olmasına karşın gerçek uygulama örnekleri ile çok verimli bir dersti.	The course content was extremely useful, educational and useful. My teacher's approach to the subjects, his general qualifications, explaining the theories to us and reinforcing them with examples, and an interactive course environment were extremely useful and productive. Although the name of the course was theory, it was a very productive course with real application examples.
4	4	4	4	4	4	4	4	4	4	4	4	4	4	4	4	Dersin içeriği anlaşılmaz ve karmaşık bir yapıda olmasına rağmen hocamızın sabırlı ve tekrar eden anlatımı için teşekkür ederim.	Although the content of the course was incomprehensible and complex, I would like to thank our teacher for his patient and repetitive explanation.
4	4	4	4	4	4	4	4	4	4	4	4	4	4	4	4	Hocamıza teşekkür ederim.	Thank you to our teacher.
4	4	4	4	4	4	4	4	4	4	4	4	4	4	4	4	Teşekkürler	Thanks
4	4	4	4	4	4	4	4	4	4	4	4	4	4	4	4	Kitap	Book
4	4	4	4	4	4	4	4	4	4	4	4	4	4	4	4	Sayın Hocamız İle ilk derslerimize girmesi ile dersde ki enerjisi çok güzel ve çok keyifliydi Teşekkür ederiz	We had our first lessons with our esteemed teacher, his energy in the lesson was very nice and very enjoyable. Thank you.
4	4	4	4	4	4	4	4	4	4	4	4	4	4	4	4	Kullanılan eğitim materyelleri öğrenmemize yardımcı olmuştur	The training materials used helped us learn
4	4	4	4	4	4	4	4	4	4	4	4	4	4	4	4	Hocamız çok iyi ve çok kaliteli, dersi çok iyi öğrendim.	Our teacher is very good and very qualified, I learned the lesson very well.
4	4	4	4	4	4	4	4	4	4	4	4	4	4	4	4	Dünyanın en enerjik ve sıkmadan ders anlatan hocası... Harika bir dönemdi teşekkür ederiz.	The most energetic and lecturing teacher in the world... It was a wonderful semester, thank you.
4	3	4	4	4	4	3	3	3	3	3	3	3	3	3	3	Fazlasıyla gereksiz bir ders olduğunu düşünüyorum. Slaytlar açılıyor ve tek tek slaytta yazan okunup geçiyor, bunu her öğrenci evde kendi de yapar. Yüzyüze olmak yerine, çevrimiçi olması daha isabet olurdu. Benzin parasının ve bunun sonucu olarakta ulaşımın pahalı olduğu bu dönemlerde, derse katılımı zorunlu kılmanın doğru olmadığını düşünüyorum. Çevrimiçi verilmesi daha isabetli olurdu kanaatimce	I think it is a very unnecessary lesson. The slides are opened and what is written on the slide is read one by one, which each student does at home. It would be more accurate to have it online instead of face to face. I think it is not right to make class attendance compulsory in these periods when gas money and, as a result, transportation is expensive. I think it would be more accurate to give …
4	4	4	4	4	4	4	4	4	4	4	4	4	4	4	4	Çok iyi	Very good
4	4	4	4	4	4	4	4	4	4	4	4	4	4	4	4	Emeğiniz için teşekkür ederim ??	Thank you for your effort ??
2	2	2	2	2	2	2	2	2	2	2	2	2	2	2	2	final sınavında işlemediğimiz (derste yetişmeyen ama sisteme yüklenen slayt) konudan soru soruldu telafi dersleri yapılmadı	In the final exam, questions were asked about the subject we did not cover (slide that was not covered in class but was uploaded to the system) and make-up lessons were not held.
4	4	4	4	4	4	4	4	4	4	4	4	4	4	4	4	iyi	Good
4	4	4	4	3	4	2	4	4	4	4	4	4	4	4	4	Genel fizik makine mühendisliği için kritik bir dersti. Dersin işlenişine ilişkin önerim bahsedilen konunun anlaşılmaması durumunda öğrencilere Türkçe izah yapılması yönünde olacaktır.	General physics was a critical course for mechanical engineering. My suggestion regarding the teaching of the course would be to explain the subject to the students in Turkish if they do not understand it.
4	4	4	4	3	3	4	3	3	3	3	3	3	3	3	3	gayet iyiydi	it was fine
2	2	2	2	2	2	2	2	2	2	2	2	2	2	2	2	Ders kitaplarını biz kendimiz de okuyabiliyoruz, keşke daha etkin bir şekilde ders anlatılsa.	We can read the textbooks ourselves, I wish the lessons were taught more effectively.
2	2	4	4	3	3	2	4	4	3	3	3	3	3	3	3	Not alma konusunda sıkıntı yaşadım, ders çok hızlı ilerliyordu. Onun dışında sıkıntım olmadı.	I had trouble taking notes, the class was moving too fast. Other than that, I had no problems.
4	4	4	4	4	4	4	4	4	4	4	4	4	4	4	4	Katkılarınızdan dolayı çok teşekkür ederim, emeklerinize sağlık Hocam.	Thank you very much for your contributions, thank you for your efforts, Sir.
2	2	2	2	2	1	2	3	2	3	3	3	3	3	3	3	Hayatımda en verim alamadığım derslerden biriydi. Niteliksizdi başka bir hoca verse belki daha verimli olurdu hiç bir şey anlamadım	It was one of the least productive lessons in my life. He was unqualified. Maybe it would have been more productive if he had been given another teacher. I didn't understand anything.
3	3	3	3	3	3	3	3	3	3	3	3	3	3	3	3	dışardan gelen bir hoca. kendisi çok iyi bir insan fakat öğretim açısından kendini daha fazla geliştirebilir.	A teacher coming from outside. He is a very good person, but he can improve himself more in terms of teaching.
4	4	4	4	4	4	4	4	4	4	4	4	4	4	4	4	Dönem boyunca derste çok eğlenceli ve eğitici vakit geçirdikm hocamız aynı zamanda sektörden olduğu için bize yer yer tüyolar verdi. çok güzel bir ders ve hocayla dönemi kapattık	We had a very fun and educational time in class throughout the semester. Our teacher gave us tips here and there since he was also from the industry. We finished the semester with a very nice lesson and teacher.
2	2	2	2	2	2	2	2	2	2	2	2	2	2	2	2	sınavlarda yanlışların doğruyu götürmesi ölçücü değildir. hiçbir şekilde bilgi düzeyim ölçülmemiştir.	It is not a criterion that mistakes cancel out the right ones in exams. My level of knowledge was not measured in any way.
3	3	3	3	3	3	3	3	3	3	3	3	3	3	3	3	Güzel	Beautiful
4	4	4	4	4	4	4	4	4	4	4	4	4	4	4	4	Çok verimli bir ders dönemiydi.	It was a very productive class period.
3	3	3	3	3	3	3	3	3	3	3	3	3	3	3	3	Reklam tasarlamak güzeldi	It was nice to design advertisements
3	3	3	3	3	3	3	3	3	3	3	3	3	3	3	3	Mitolojiyi severim	I like mythology
4	4	4	4	4	4	4	4	4	4	4	4	4	4	4	4	okey	Okey
4	4	4	4	4	4	4	4	4	4	4	4	4	4	4	4	ders iyiydi hocalar iyiydi aşırı fazla detaycilik vardi bazı slaytları anlatırken hocada ama ders genel olarak güzeldi	The course was good, the teachers were good, there was too much detail in the teacher while explaining some of the slides, but the course was generally good.
2	2	2	4	4	2	2	2	4	2	2	2	2	2	2	2	Öğretmenimiz bizi dönem ortasında emekli olmasıyla mağdur etmiştir, en azından dönem sonuna kadar bu şekilde gitmemesi yada en azından video olarak donem derslerini tamamlaması gerektiğini düşünüyorum. Sonradan sınavlara yönelik yüklenen ders videolarını yetersiz ve geç paylaşılmış olarak görüyorum.	Our teacher has victimized us by retiring in the middle of the semester, I think he should not continue like this until the end of the semester or at least complete the semester lessons as a video. I see the lesson videos uploaded later for the exams as insufficient and shared late.
3	3	3	3	3	3	3	3	3	3	3	3	3	3	3	3	olumlu	positive
4	4	4	4	4	4	4	4	4	4	4	4	4	4	4	4	Dersler verimli geçti.	The lessons were productive.
4	4	4	4	4	4	4	4	4	4	4	4	4	4	4	4	Güzel.	Beautiful.
4	4	4	4	4	4	4	4	4	4	4	4	4	4	4	4	Dersler keyifli ve anlaşılır geçti.	The lessons were enjoyable and understandable.
4	4	4	4	4	4	4	4	4	4	4	4	4	4	4	4	Hocamız çok iyi bir öğretmen	Our teacher is a very good teacher.
[truncated: 11,843 more rows]
